# Supplementary material for: Relandscaping the Gut Microbiota with a Whole Food: Dose–Response Effects to Common Bean
Source: MDPI journal article supplement (doi:10.3390/foods11081153), 2022-04-15
Supplement: s1 [file s1]

## Supplementary Materials

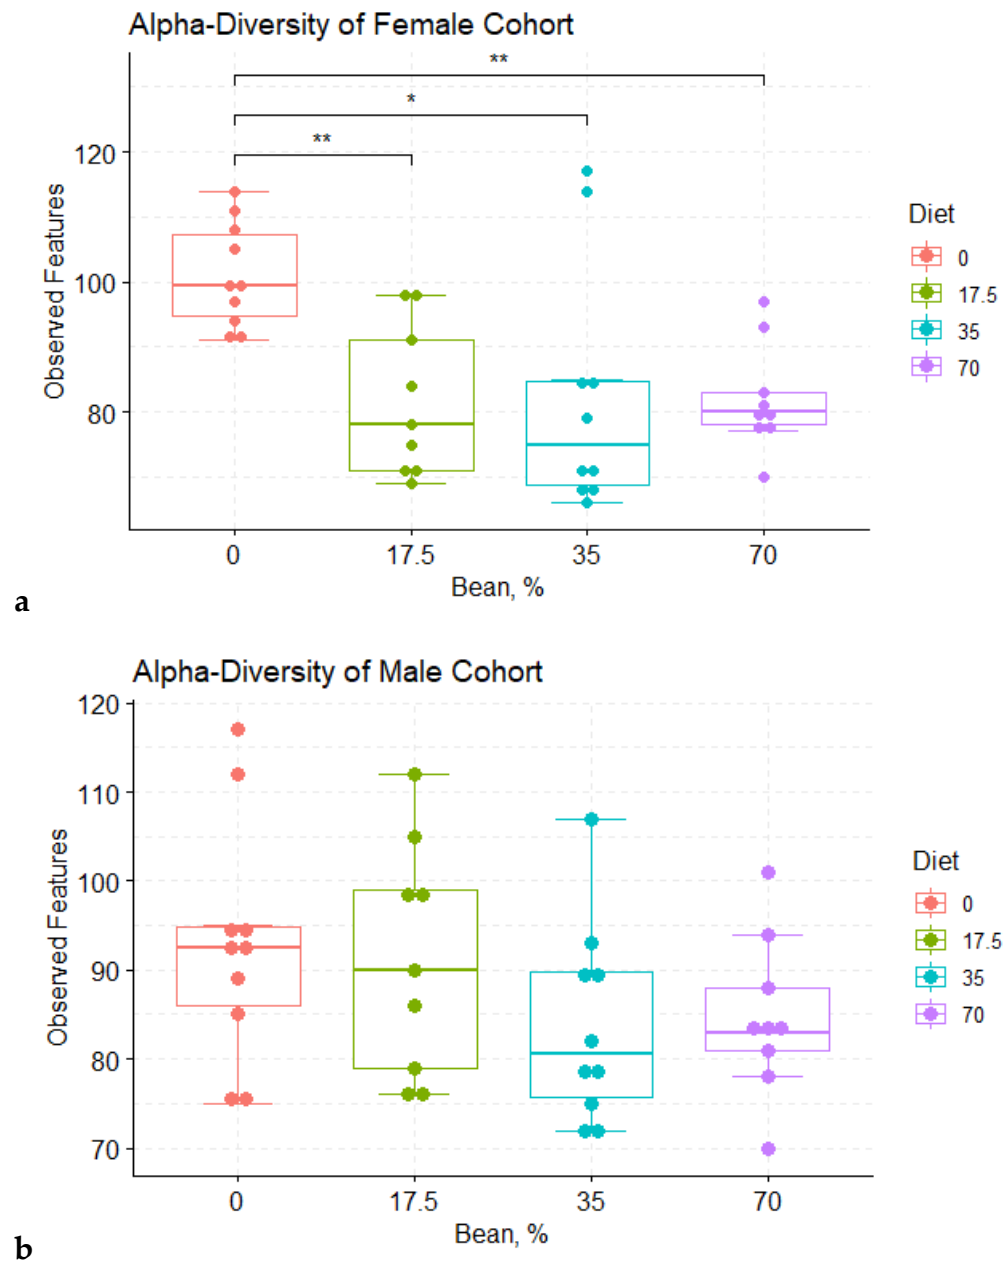

**Figure S1. (a)** Observed features of  $\alpha$ -diversity of the female cohort. Statistically significant differences were determined by the Kruskal-Wallis test ( $p$ -value = 0.006) with \*  $q$ -value < 0.05; \*\*  $q$ -value < 0.01; **(b)** Observed features of  $\alpha$ -diversity of the male cohort. Statistically significant differences were tested with the Kruskal-Wallis method ( $p$ -value = 0.265).

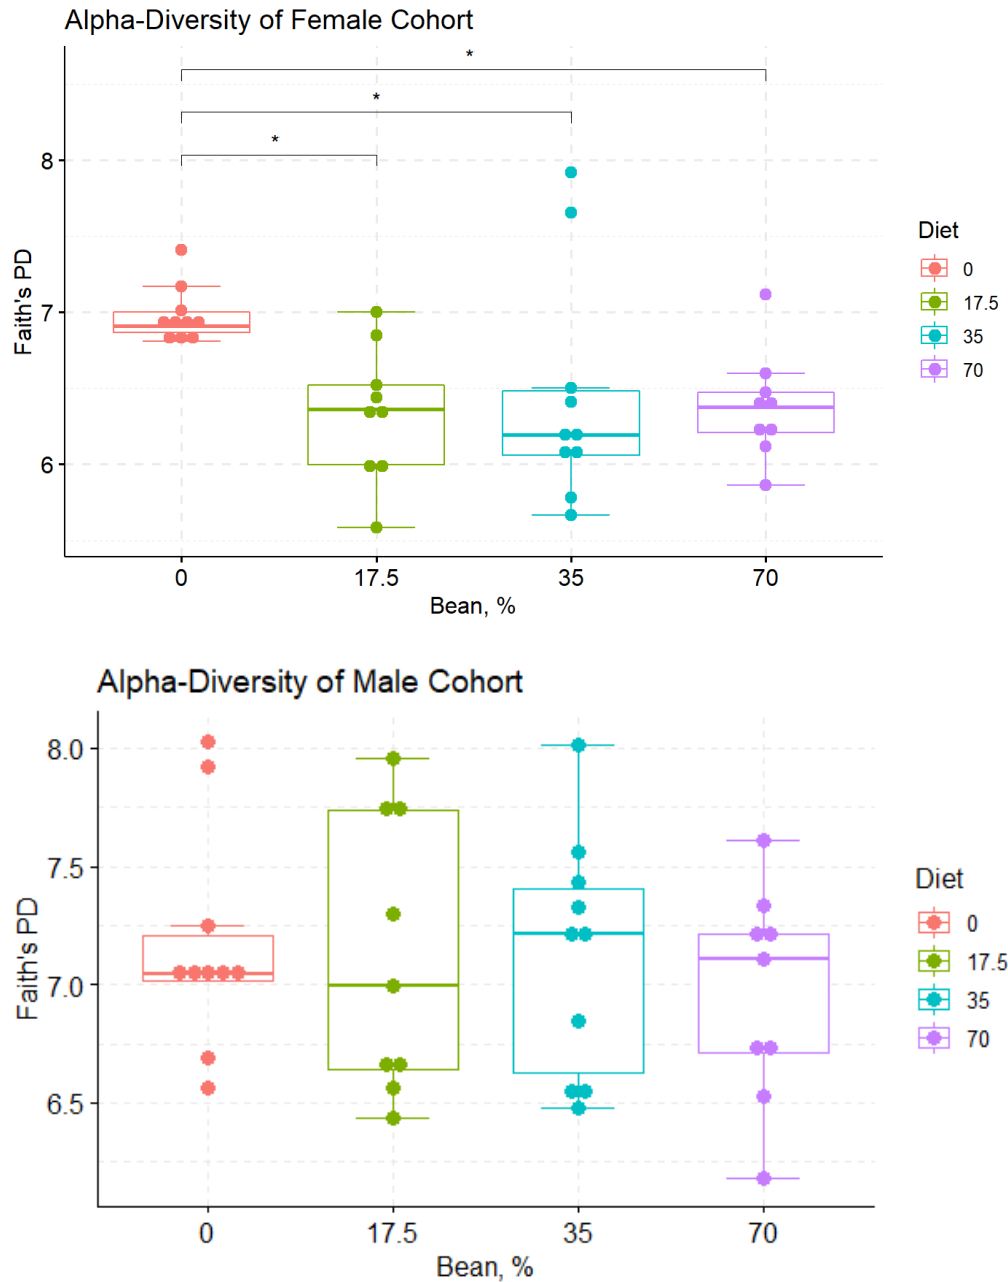

**Figure S2. (a)** Faith's phylogenetic  $\alpha$ -diversity of the female cohort. Statistically significant differences were determined by the Kruskal-Wallis test ( $p$ -value = 0.008) with \*  $q$ -value < 0.05; \*\*  $q$ -value < 0.01; **(b)** Faith's phylogenetic  $\alpha$ -diversity of the male cohort. Statistically significant differences were tested with the Kruskal-Wallis method ( $p$ -value = 0.941).

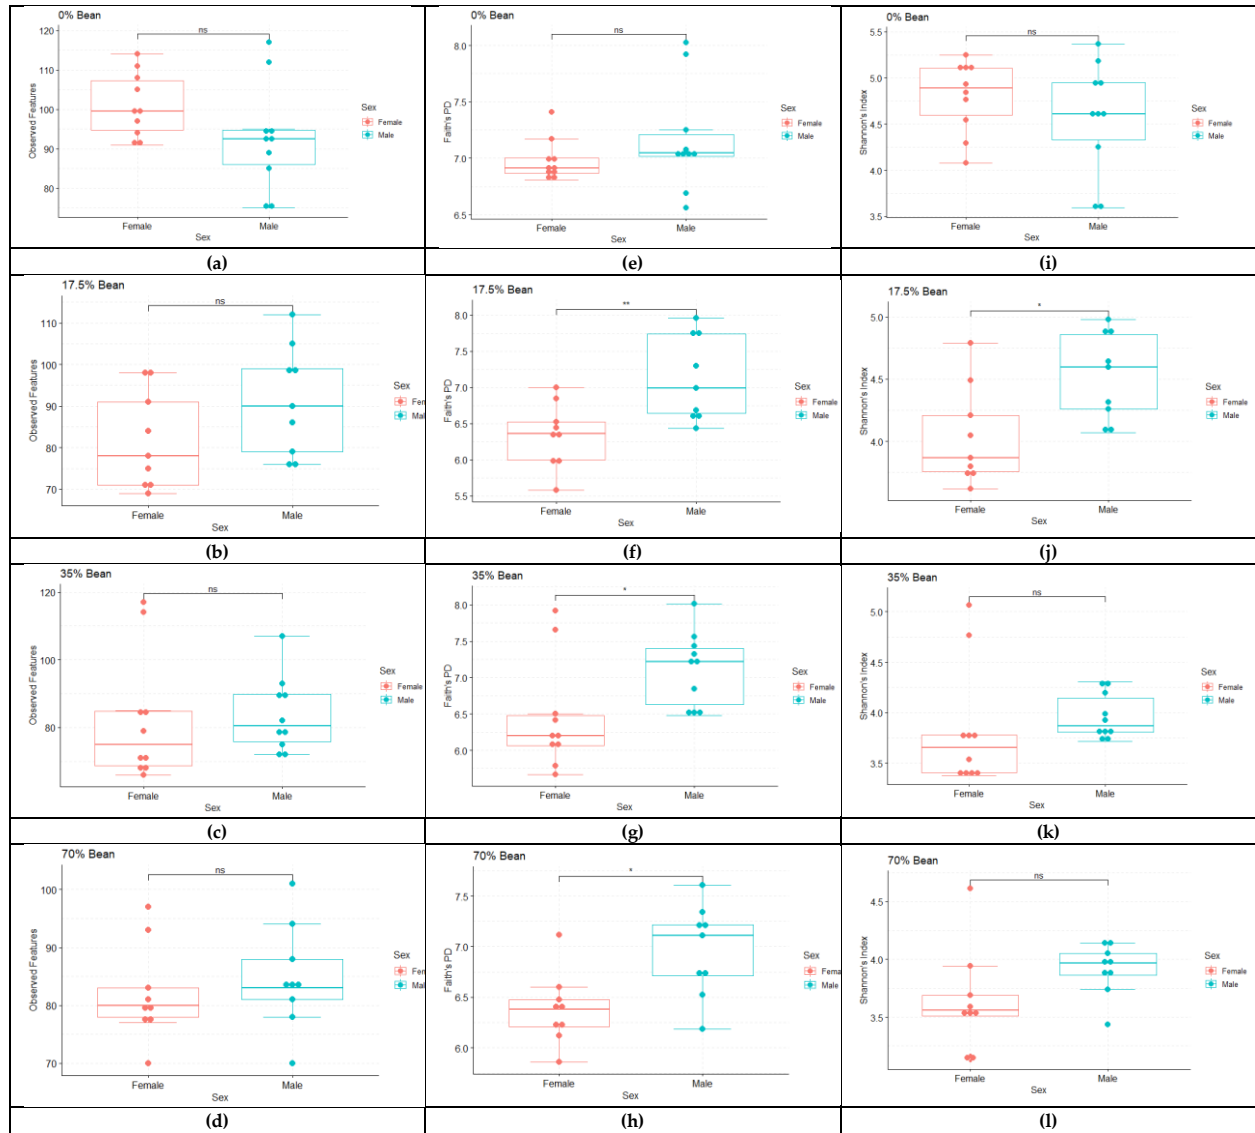

**Figure S3.** Sex-pairwise comparison of  $\alpha$ -diversity. Statistically significant differences were determined by the Wilcoxon signed-rank tests with \*  $p$ -value  $< 0.05$ ; \*\*  $p$ -value  $< 0.01$ ; (a–d) Observed  $\alpha$ -diversity features; (e–h) Faith's phylogenetic  $\alpha$ -diversity; (i–l) Shannon's indices of  $\alpha$  diversity.

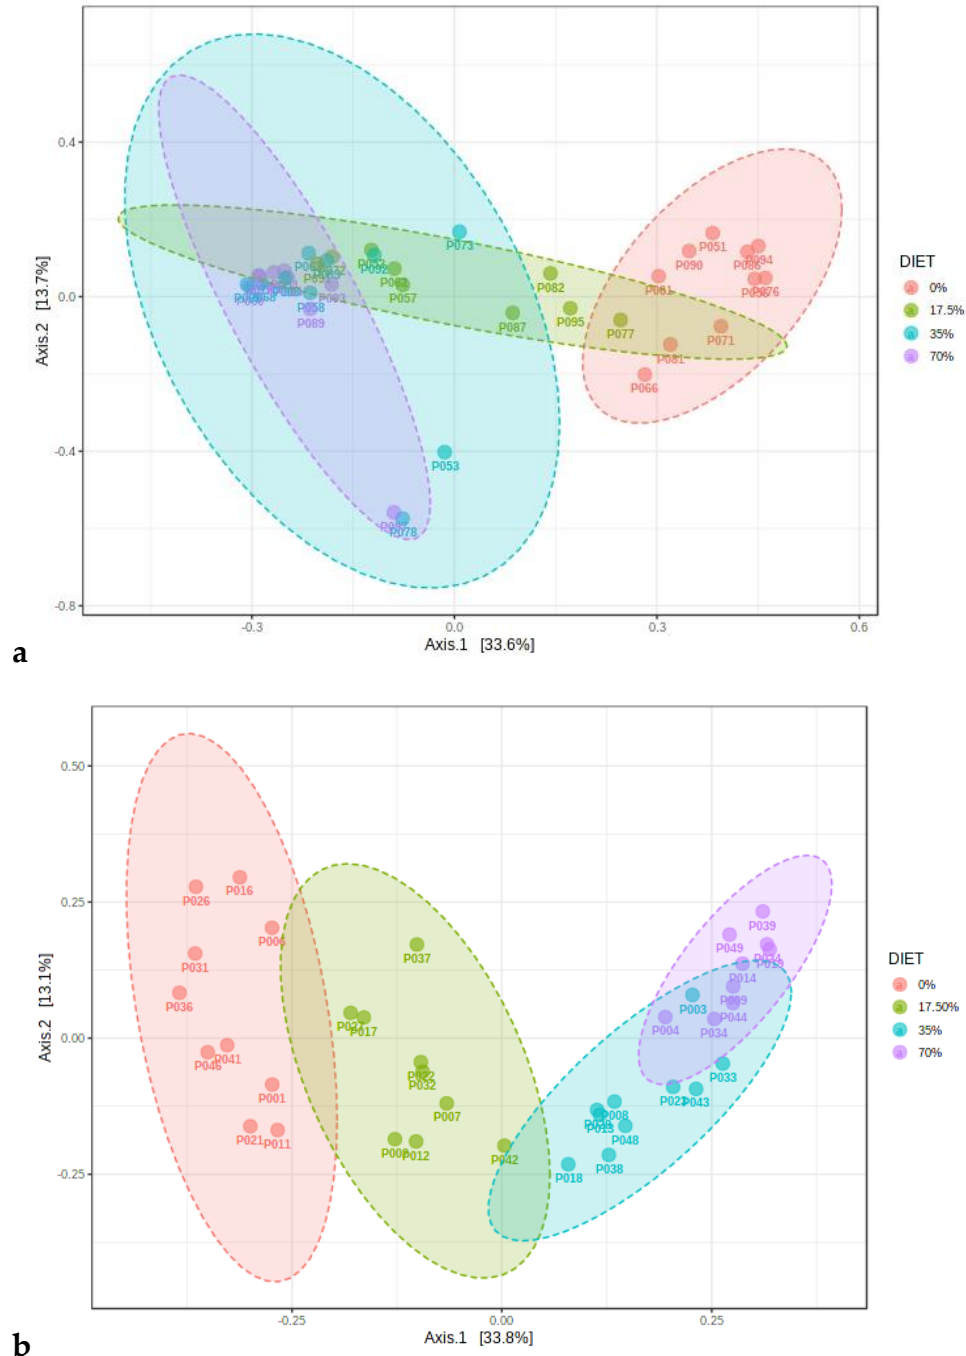

**Figure S4.** Jaccard indices were used to explain  $\beta$ -diversity across the diet groups. Differences between the samples were tested by the permutational multivariate analysis of variance (PERMANOVA); samples are colored and grouped by their corresponding diet group into ellipses representing 95% confidence intervals. **(a)** in the female cohort, pseudo- $F$ -value = 7.251;  $p$ -value < 0.001. All diet groups statistically differed from one another; **(b)** in the male cohort, pseudo- $F$ -value = 8.85;  $p$ -value < 0.001. All diet groups statistically differed from one another.

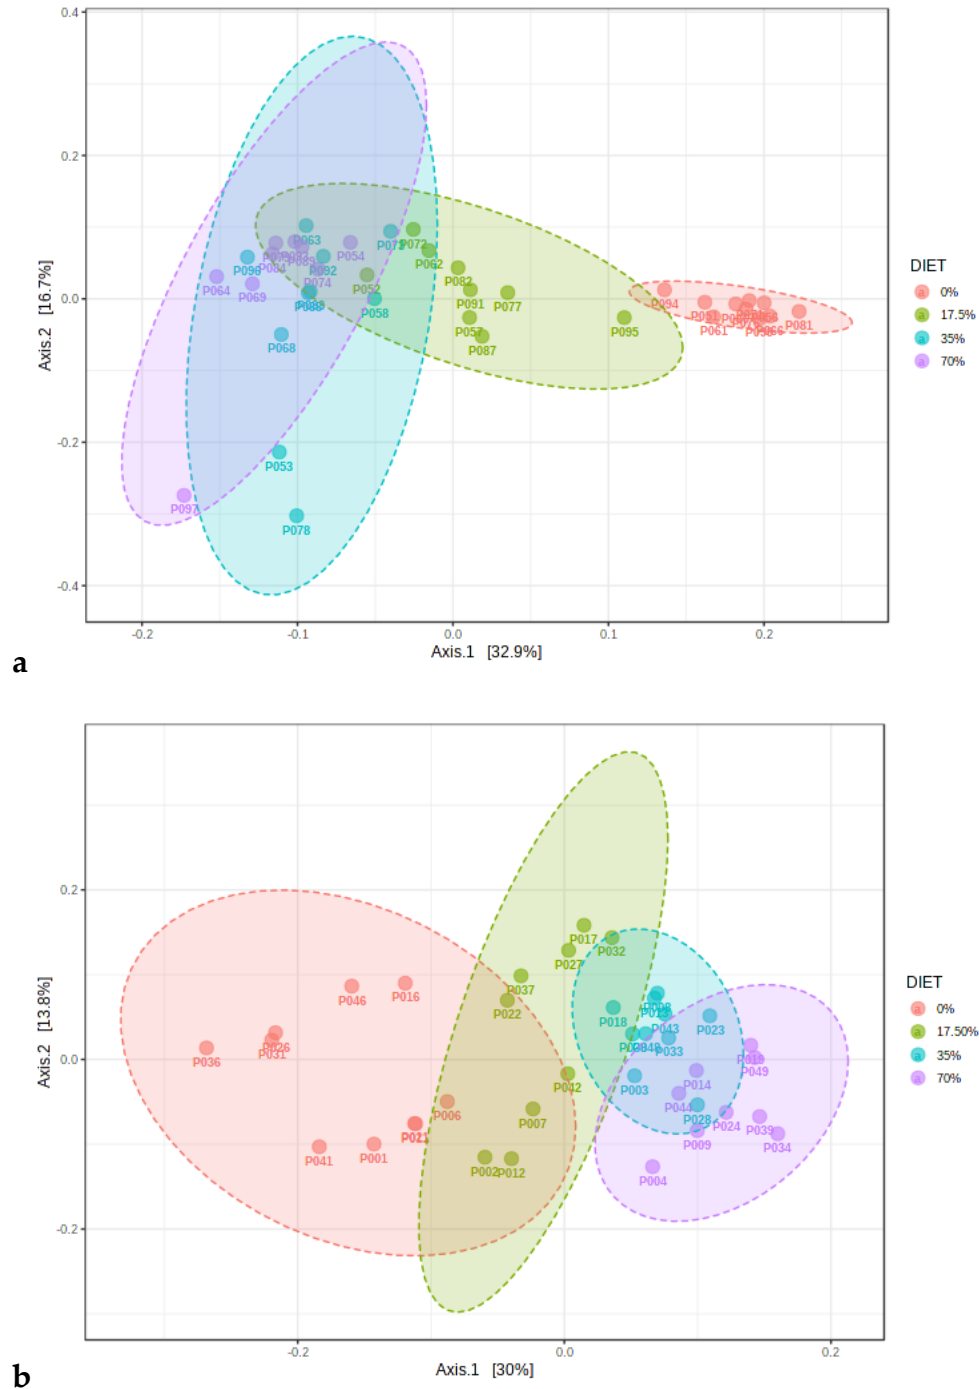

**Figure S5.** Phylogenetic Unweighted UniFrac distances were used to explain  $\beta$ -diversity across diet groups. Differences between the samples were tested by the permutational multivariate analysis of variance (PERMANOVA): samples are colored and grouped by their corresponding diet group into ellipses representing 95% confidence intervals. **(a)** in the female cohort, pseudo- $F$ -value = 7.236;  $p$ -value < 0.001. All diet groups differed from one another, except for 35% vs 70% groups; **(b)** in the male cohort, pseudo- $F$ -value = 7.192;  $p$ -value < 0.001. All diet groups differed from one another.

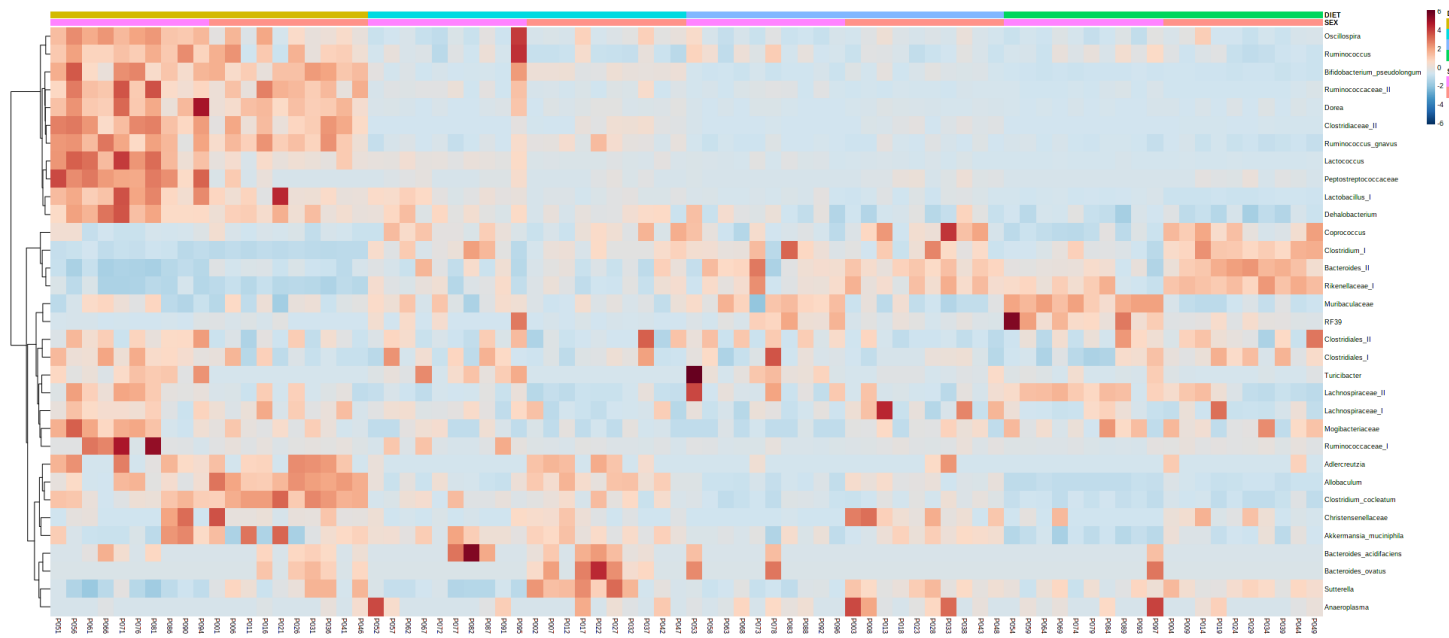

**Figure S6.** Heatmap representing hierarchical clustering analysis results at the feature level. Clusters were organized by the diet group factor using Ward’s algorithm and Minkowski’s distance measure.

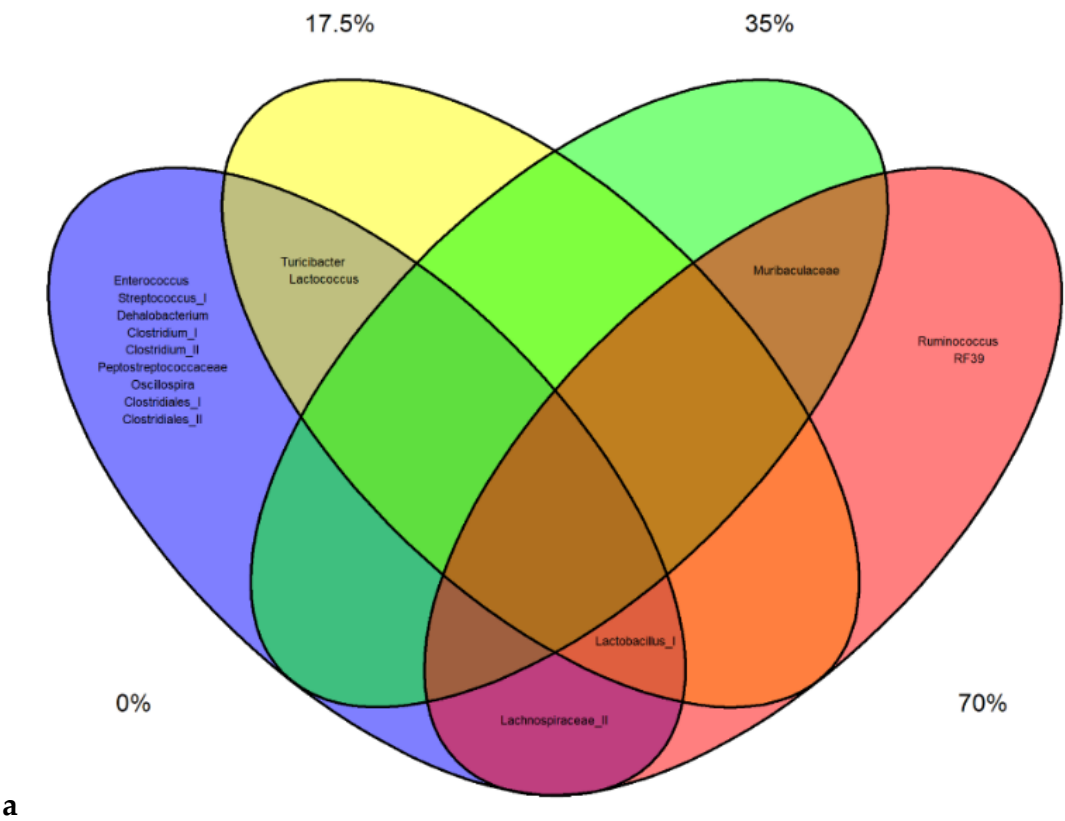

**a**

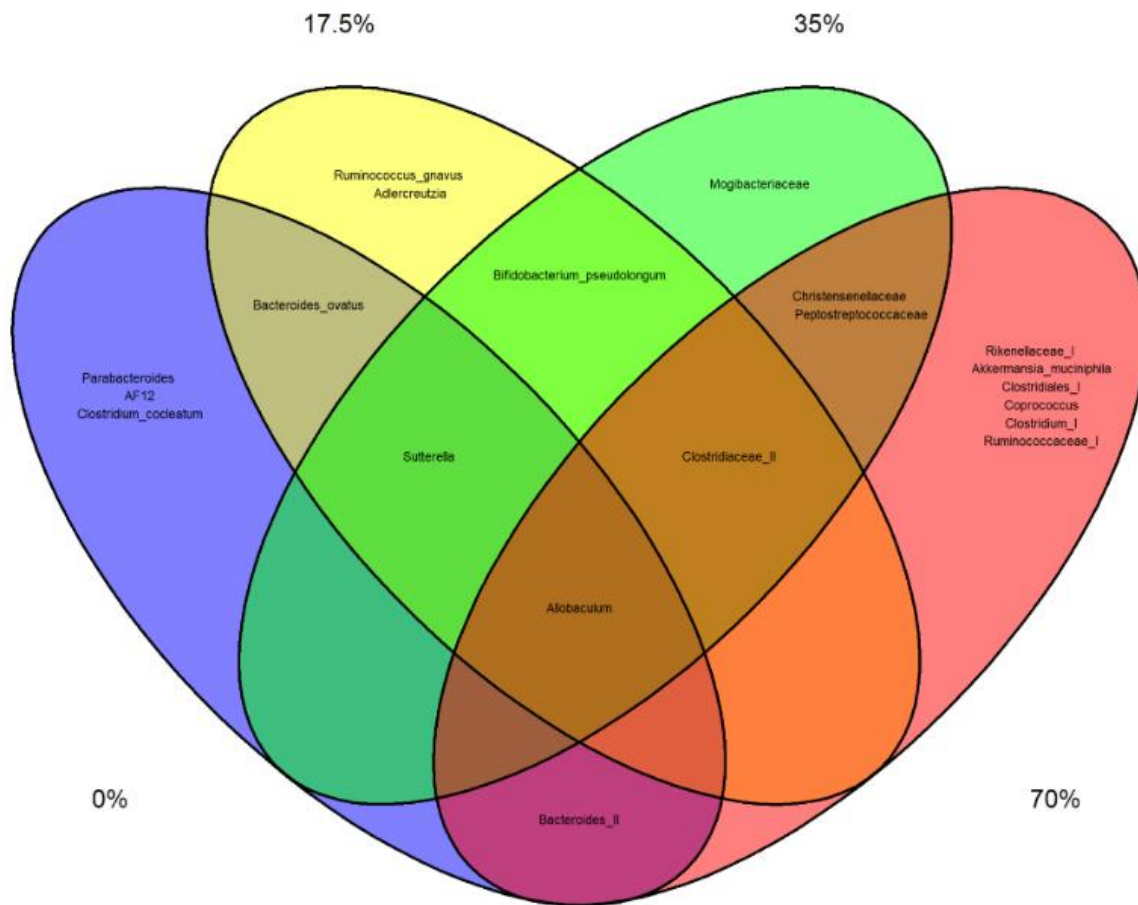

**b**

**Figure S7.** Bacterial sex-dependent biomarkers of the **(a)** female and **(b)** male cohorts in each diet group according to the pairwise linear discriminant analysis (LDA) of effect size (LEfSe) at the feature level. All represented bacteria were statistically significant (LDA score > |2.0|, FDR-adjusted  $p$ -value < 0.05).

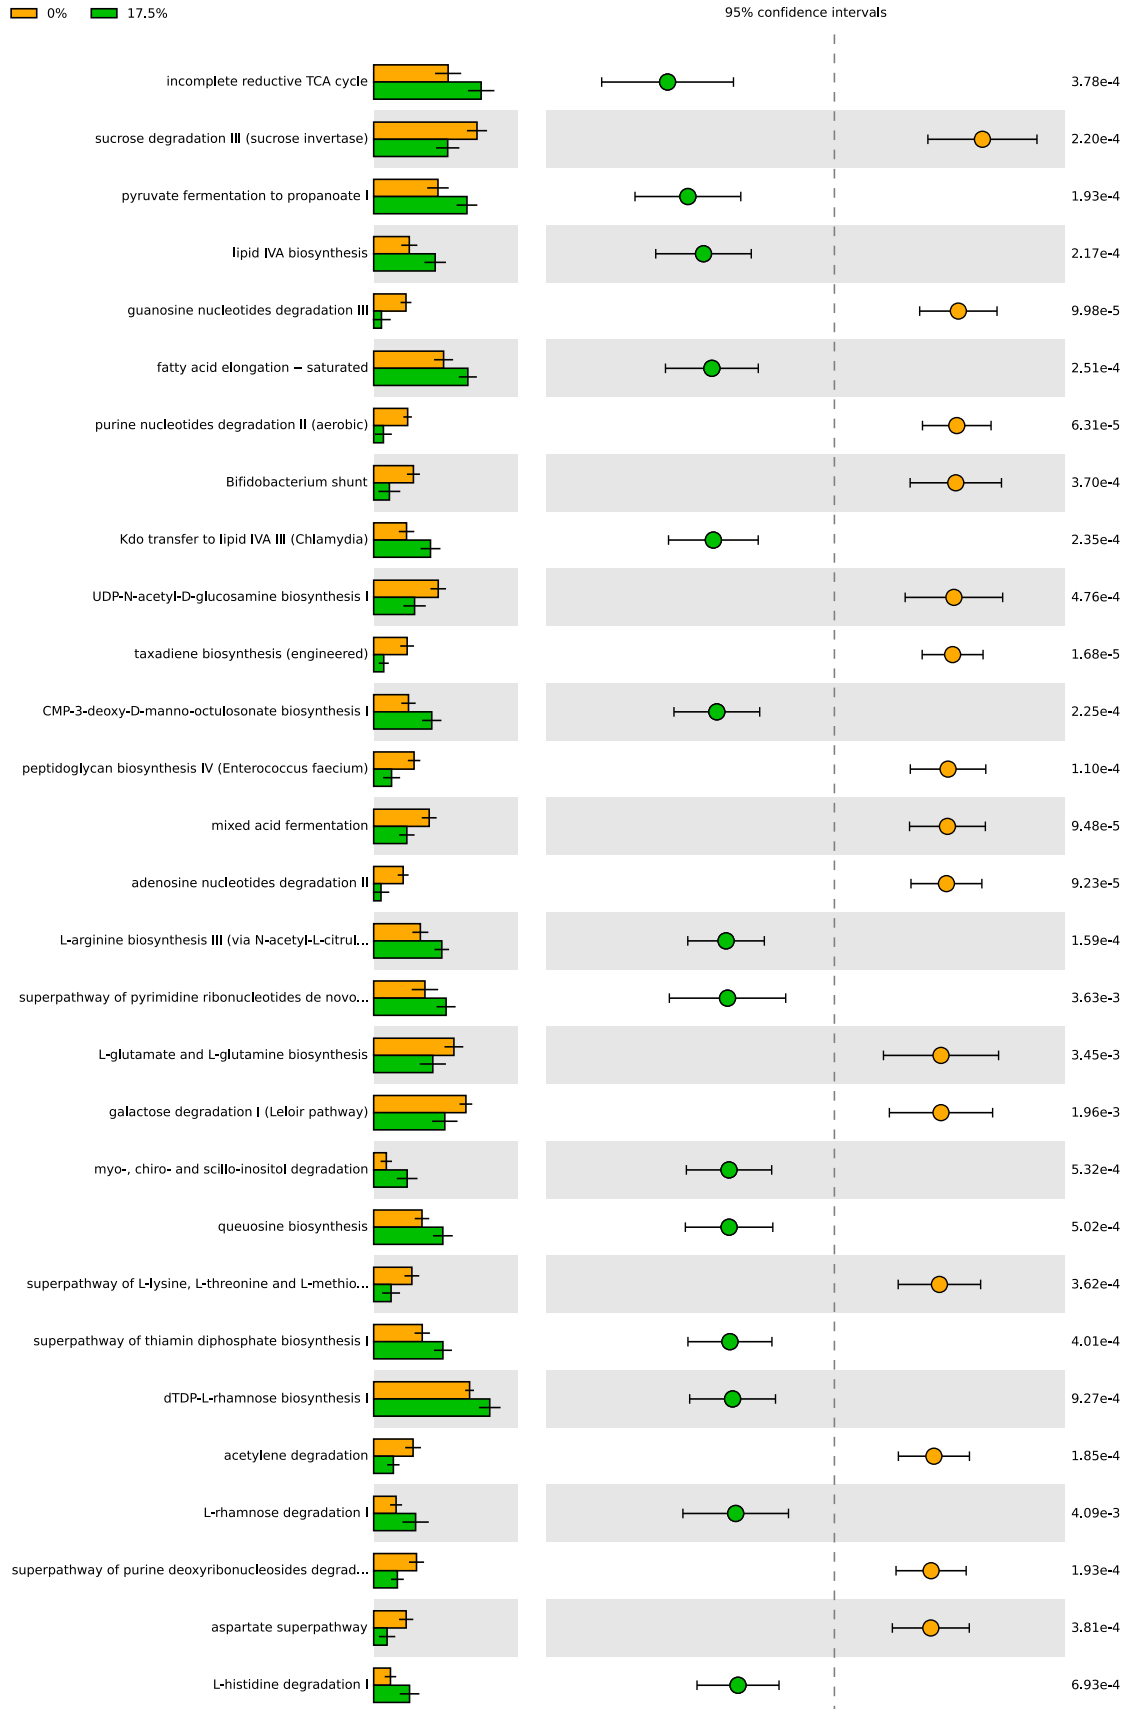

a.



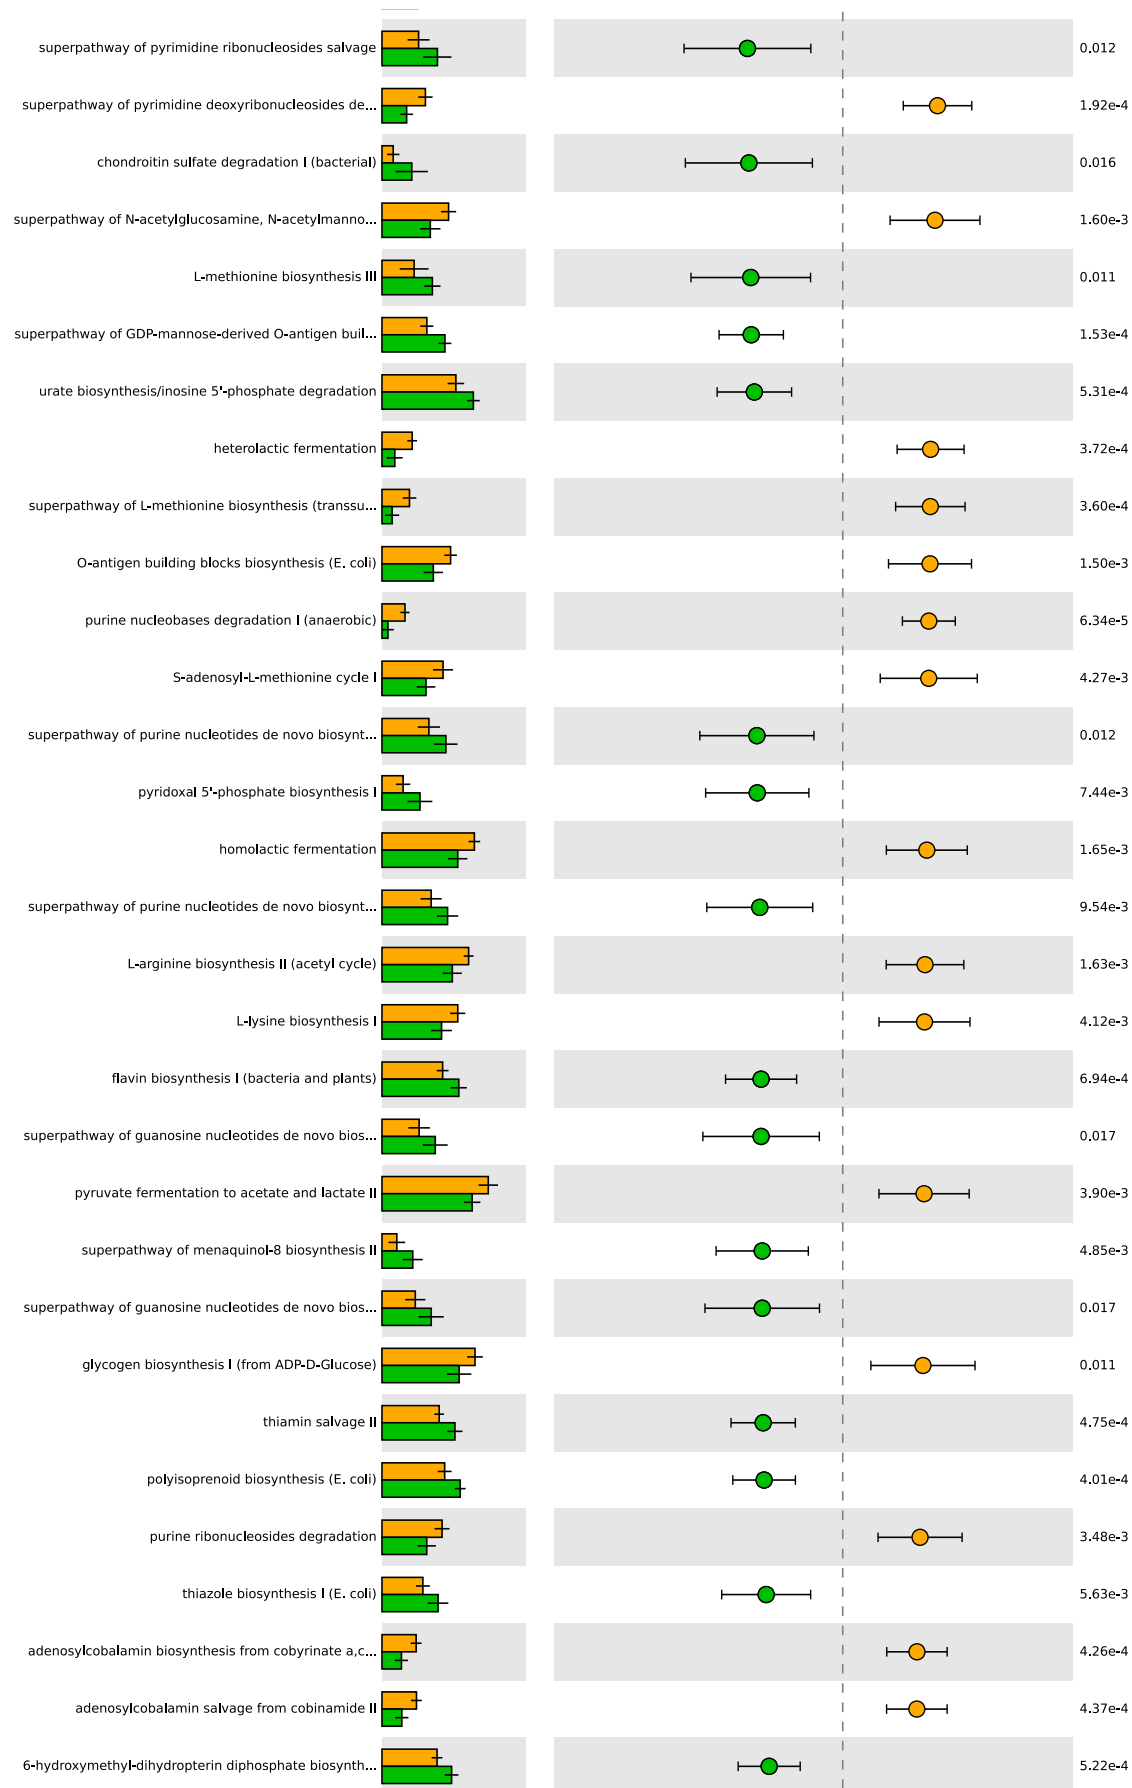

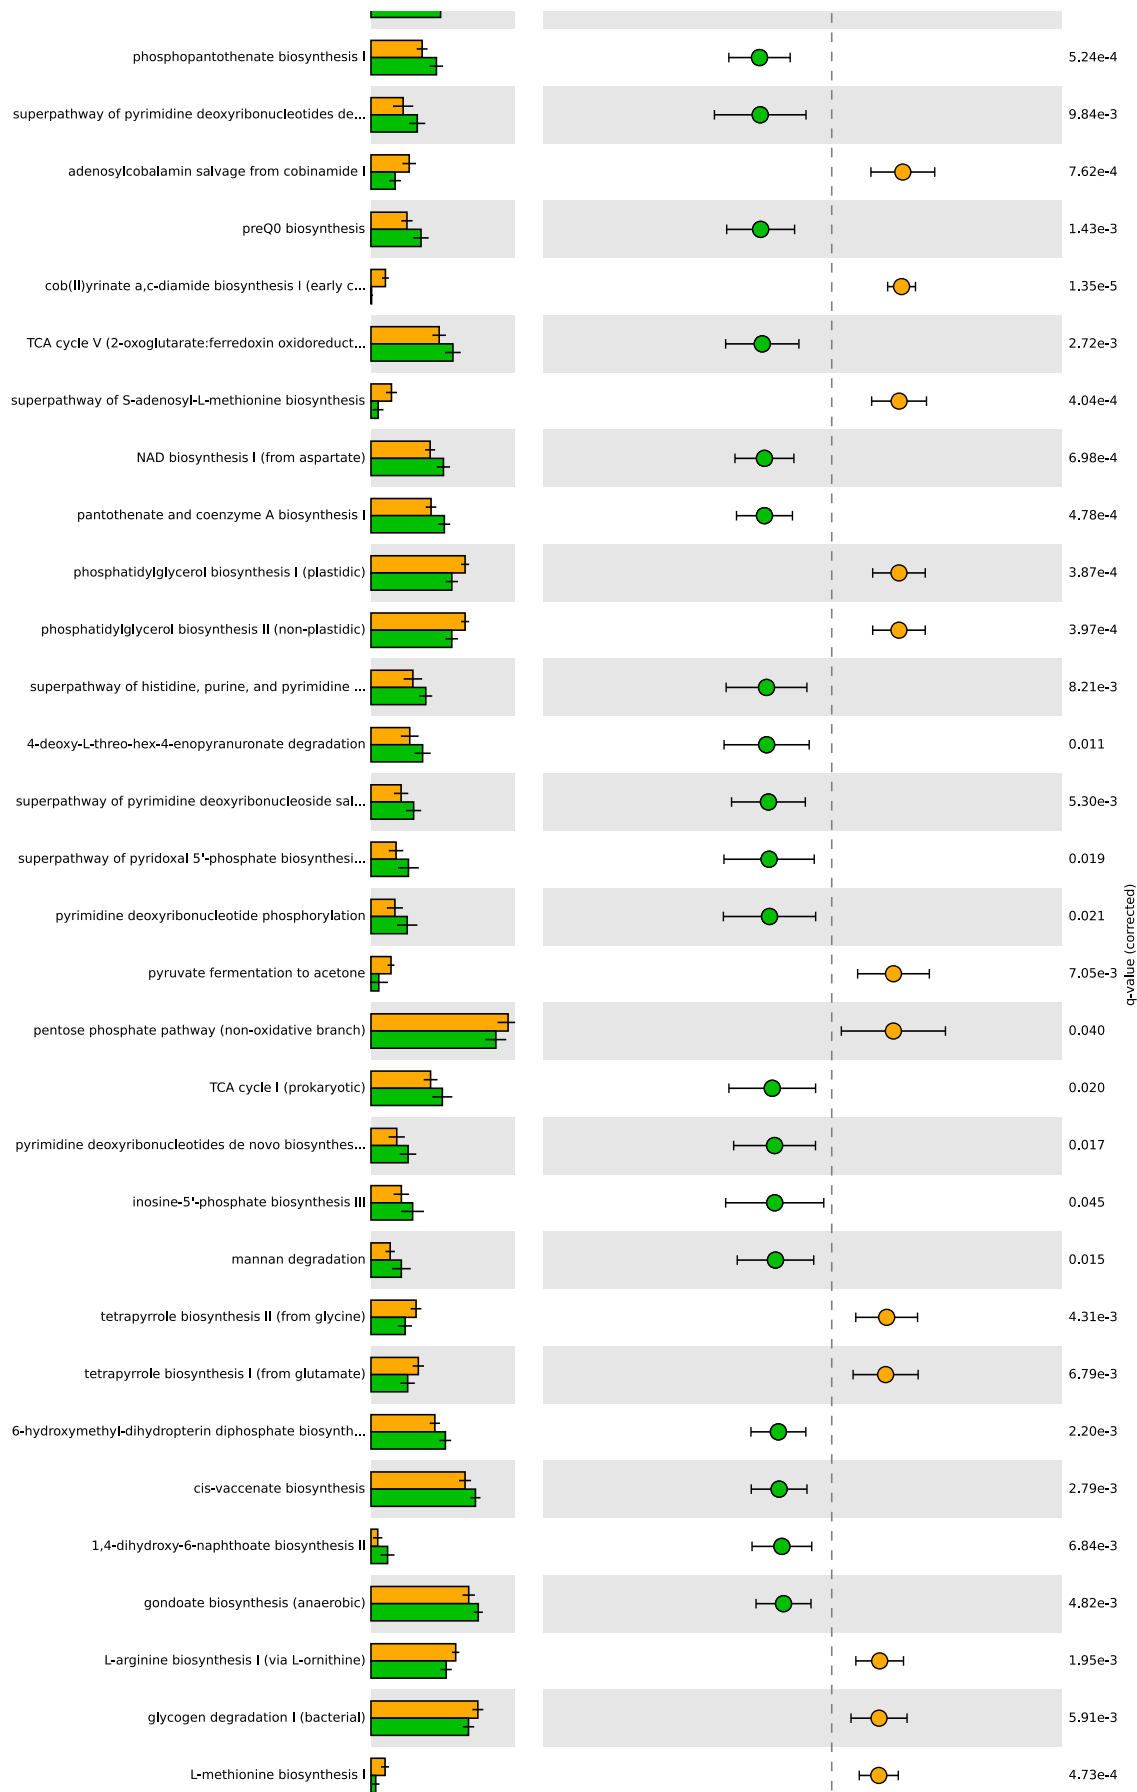

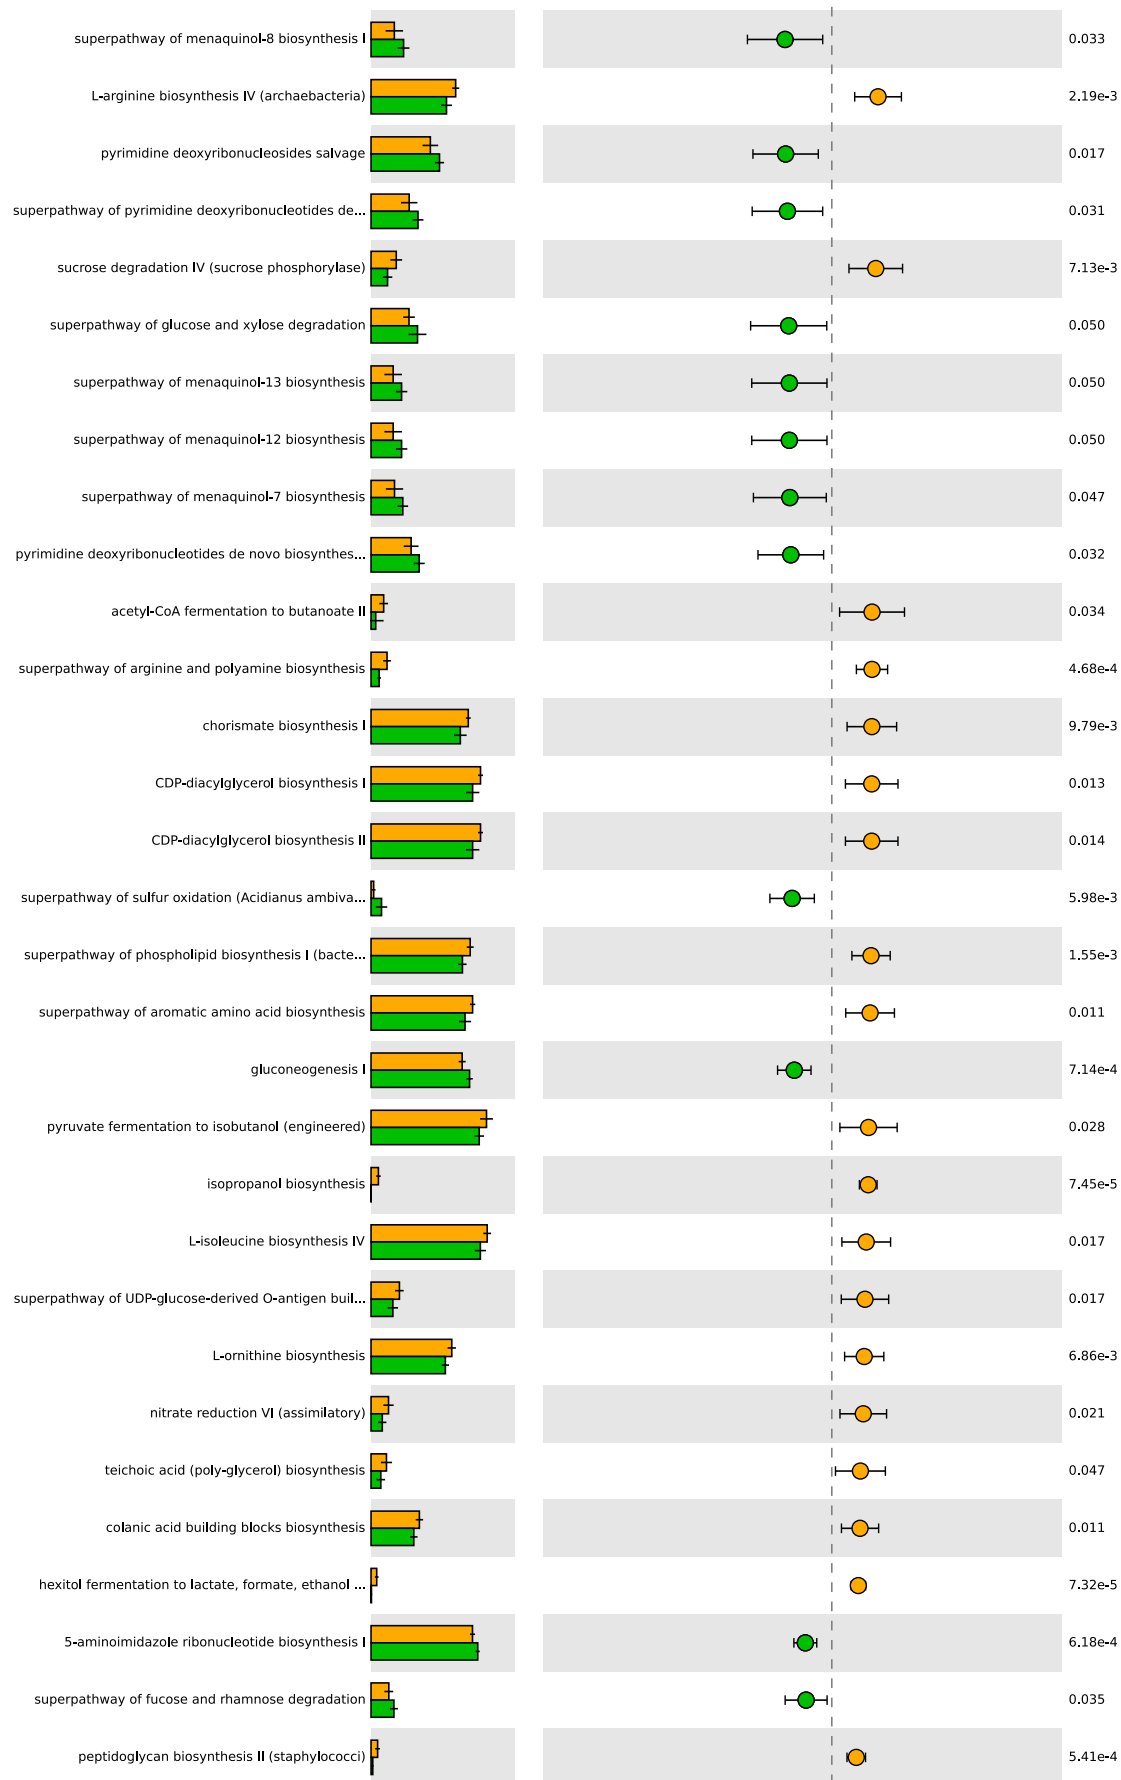

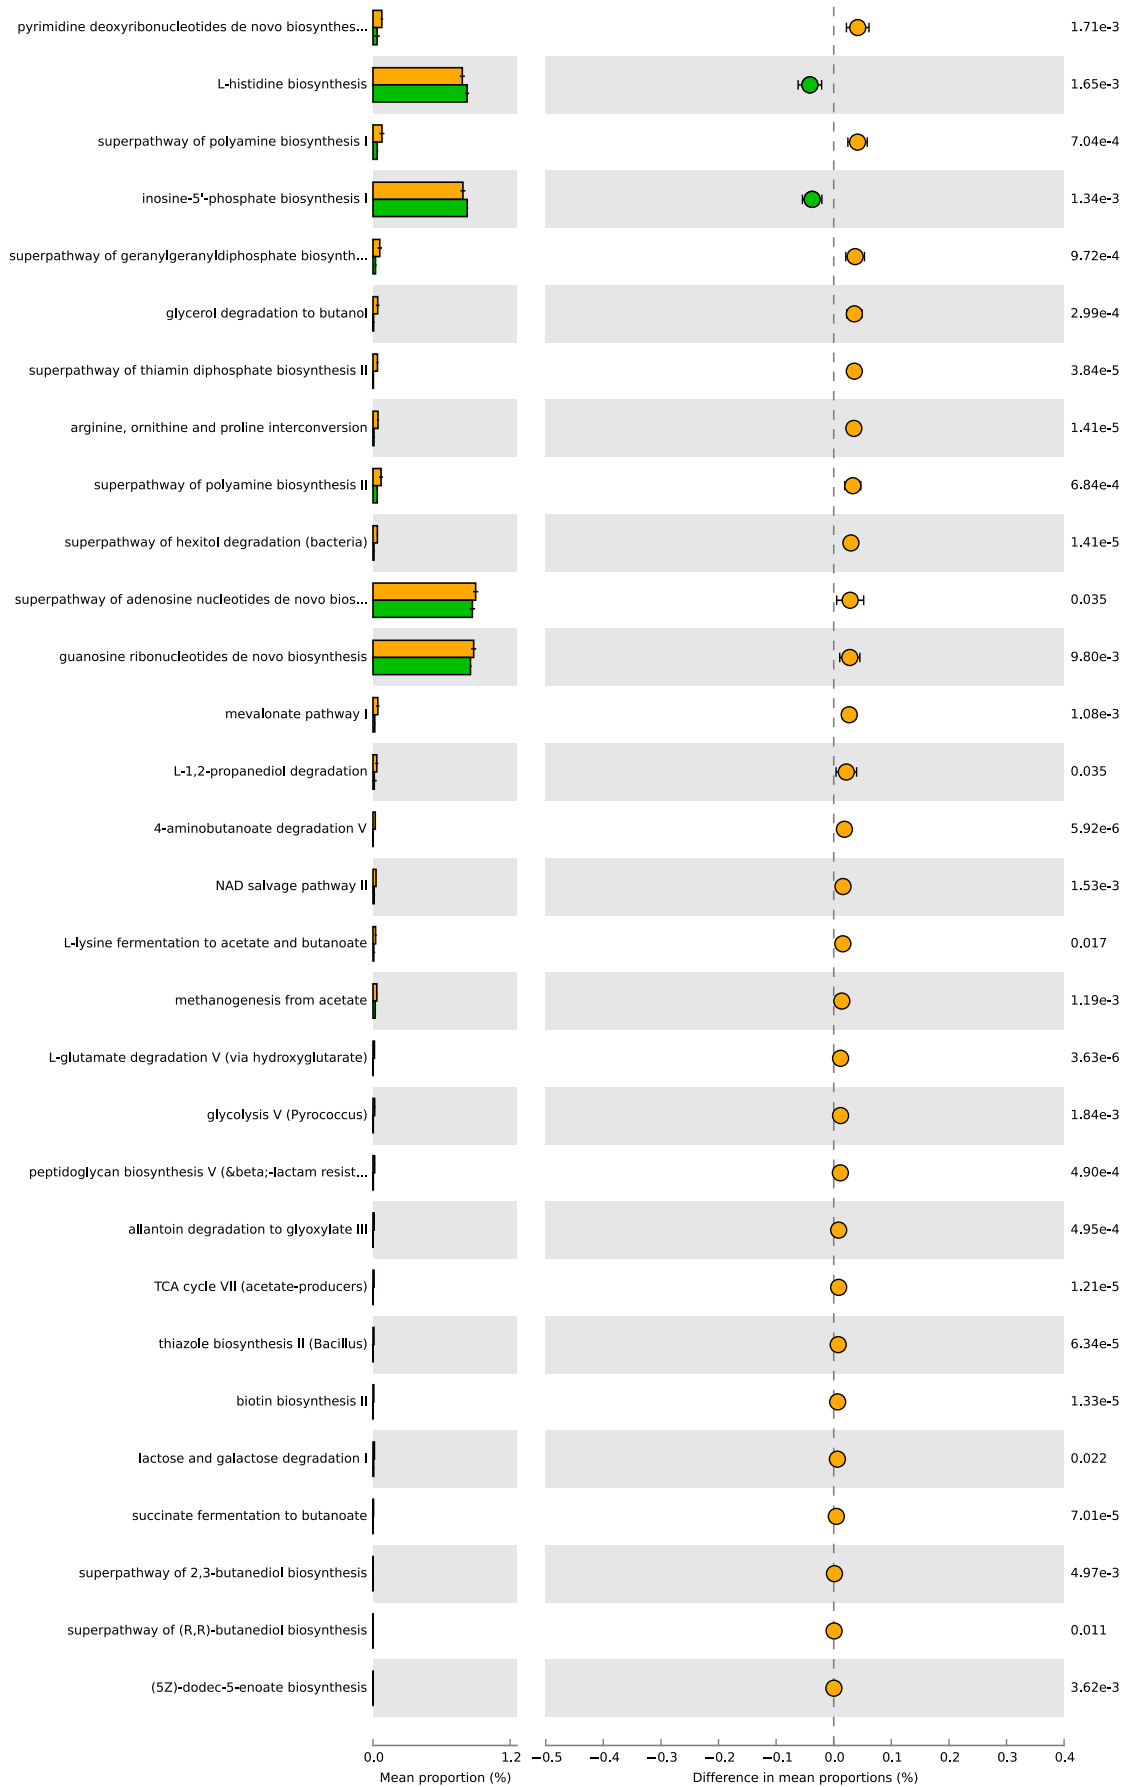

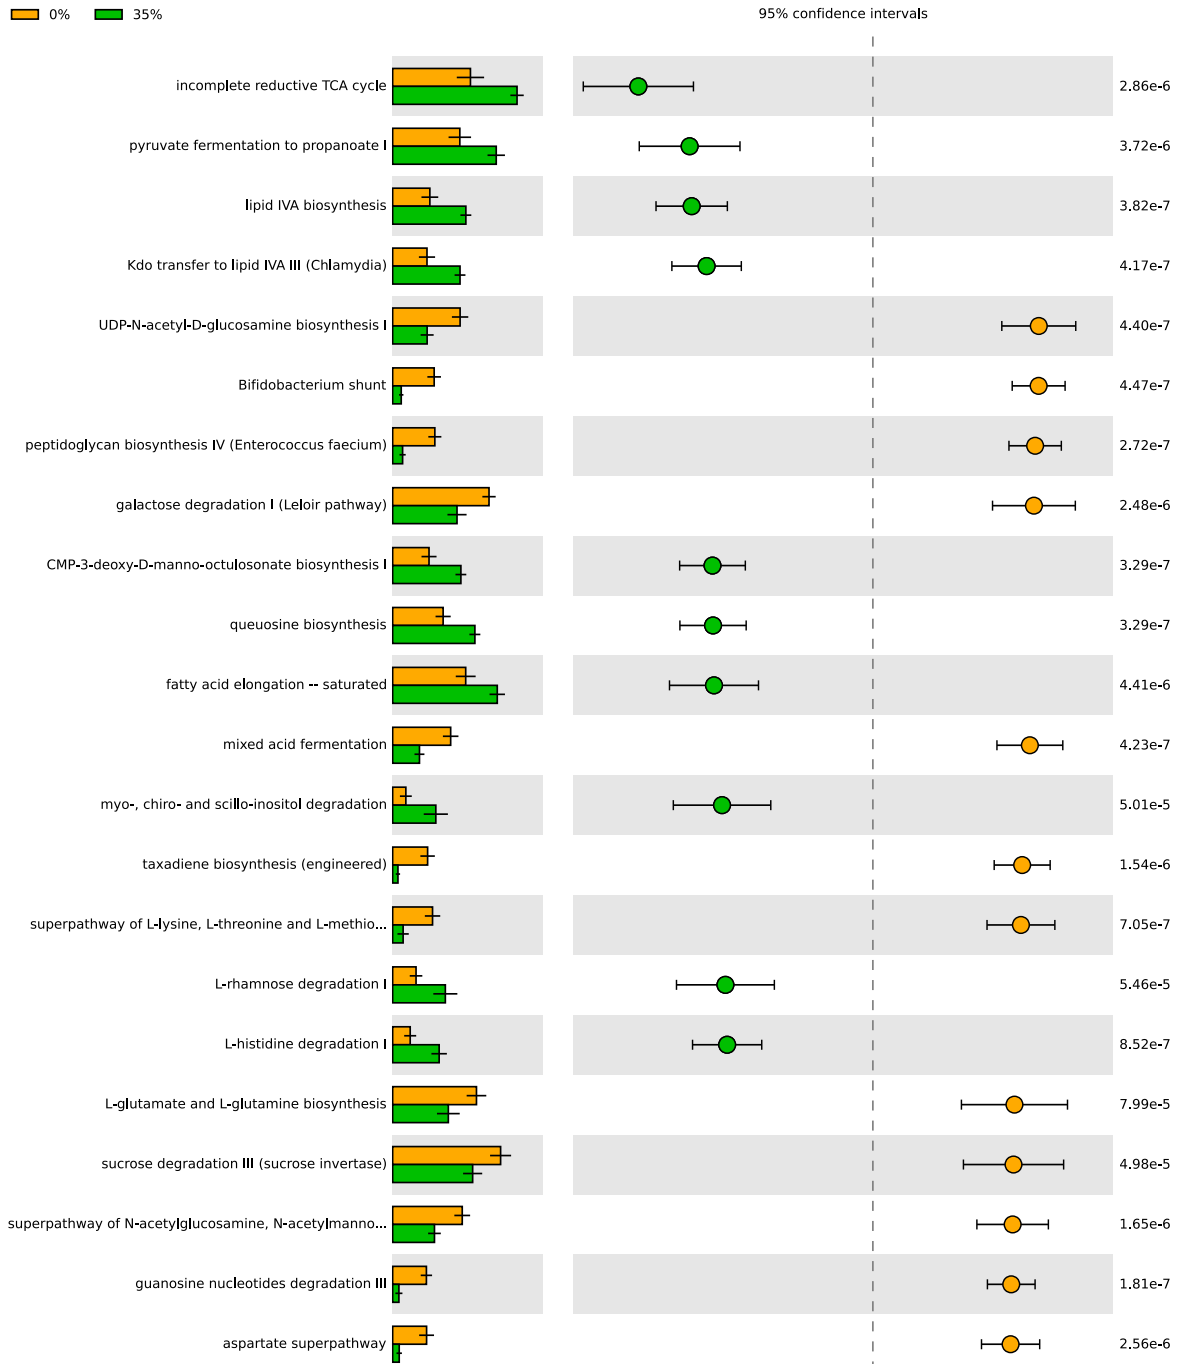

b.

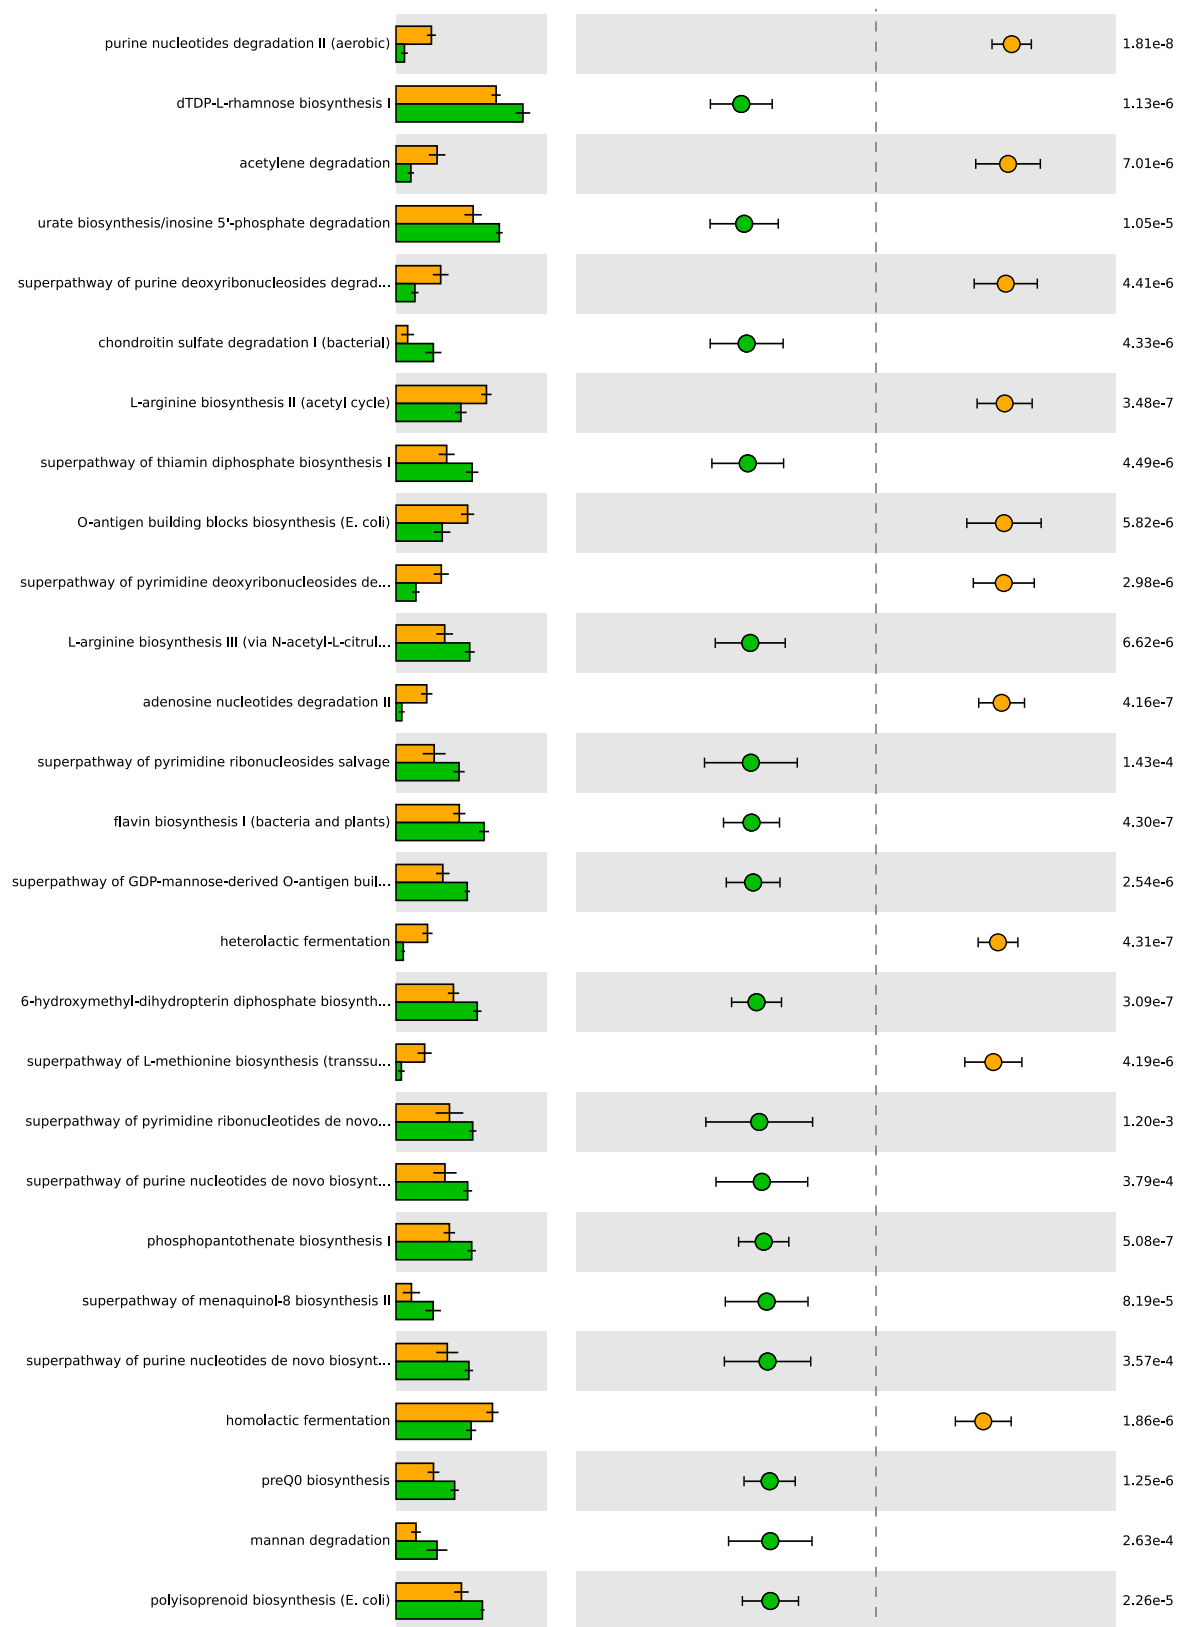

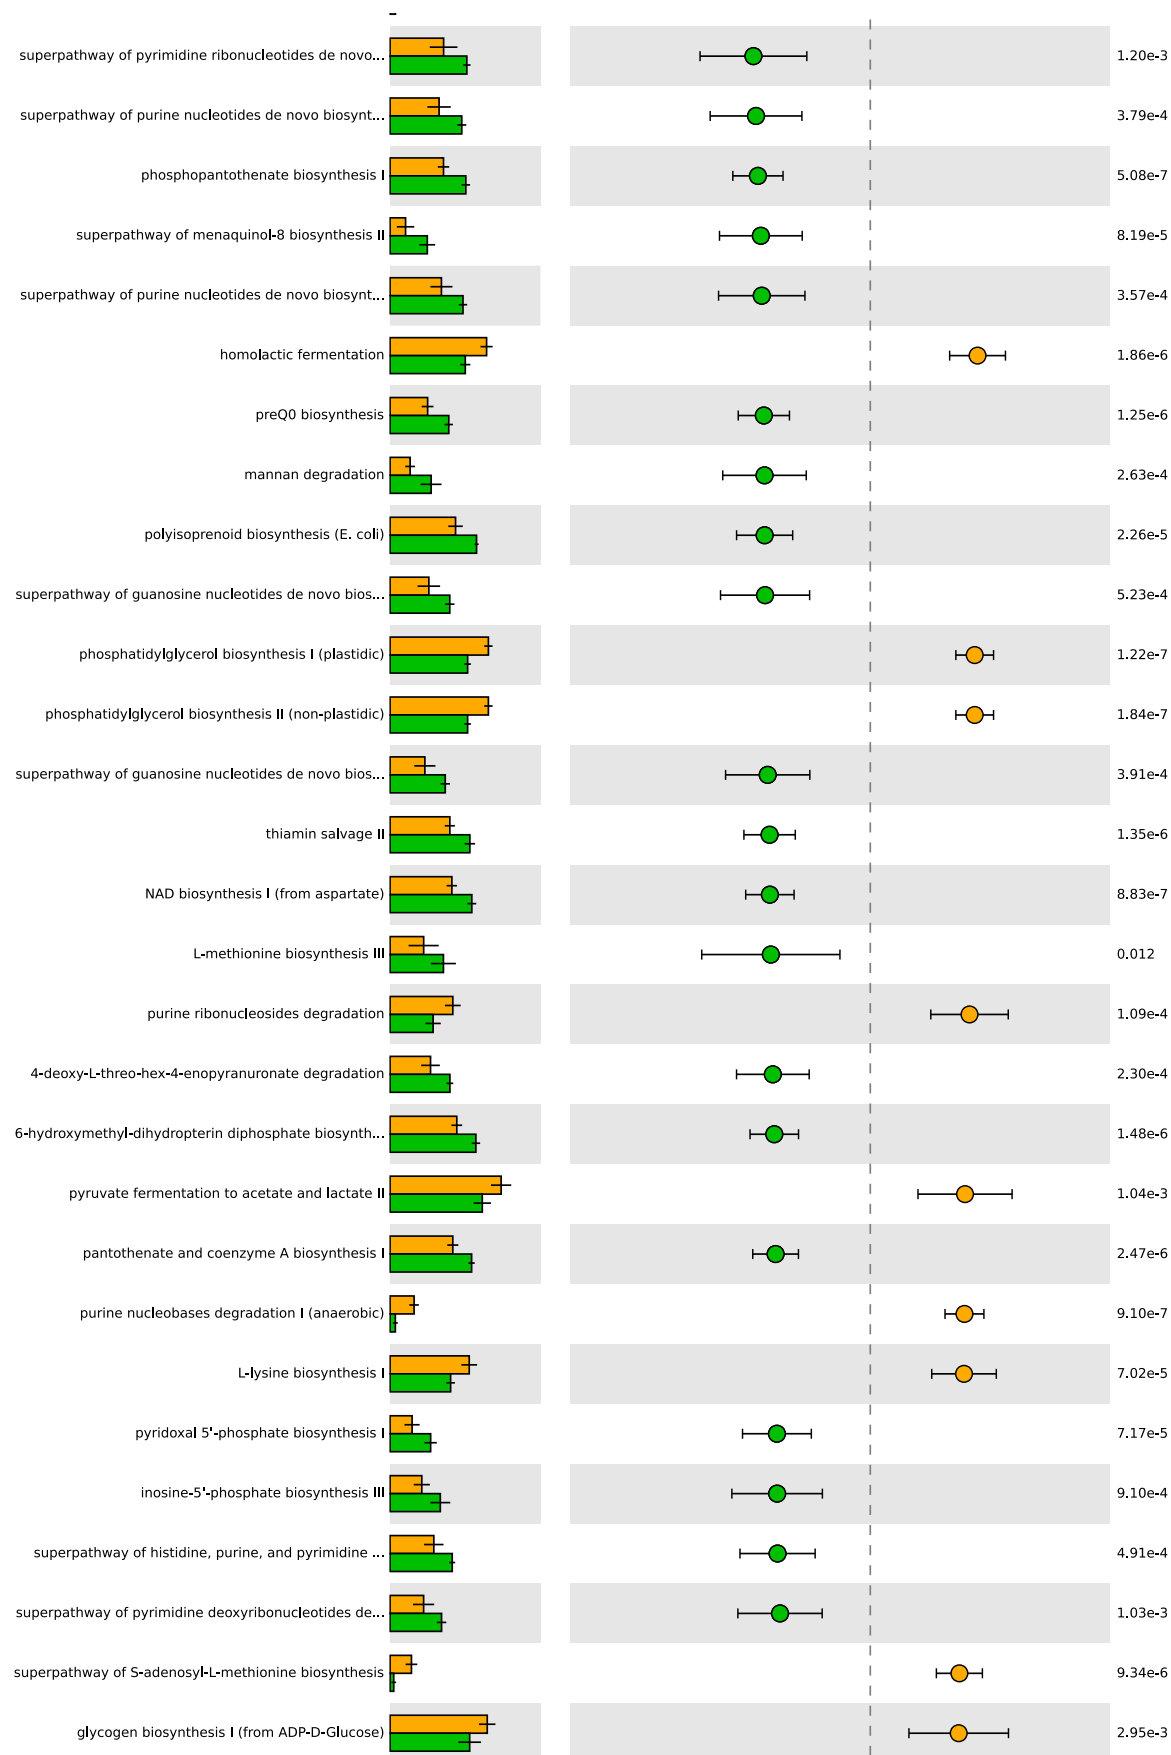

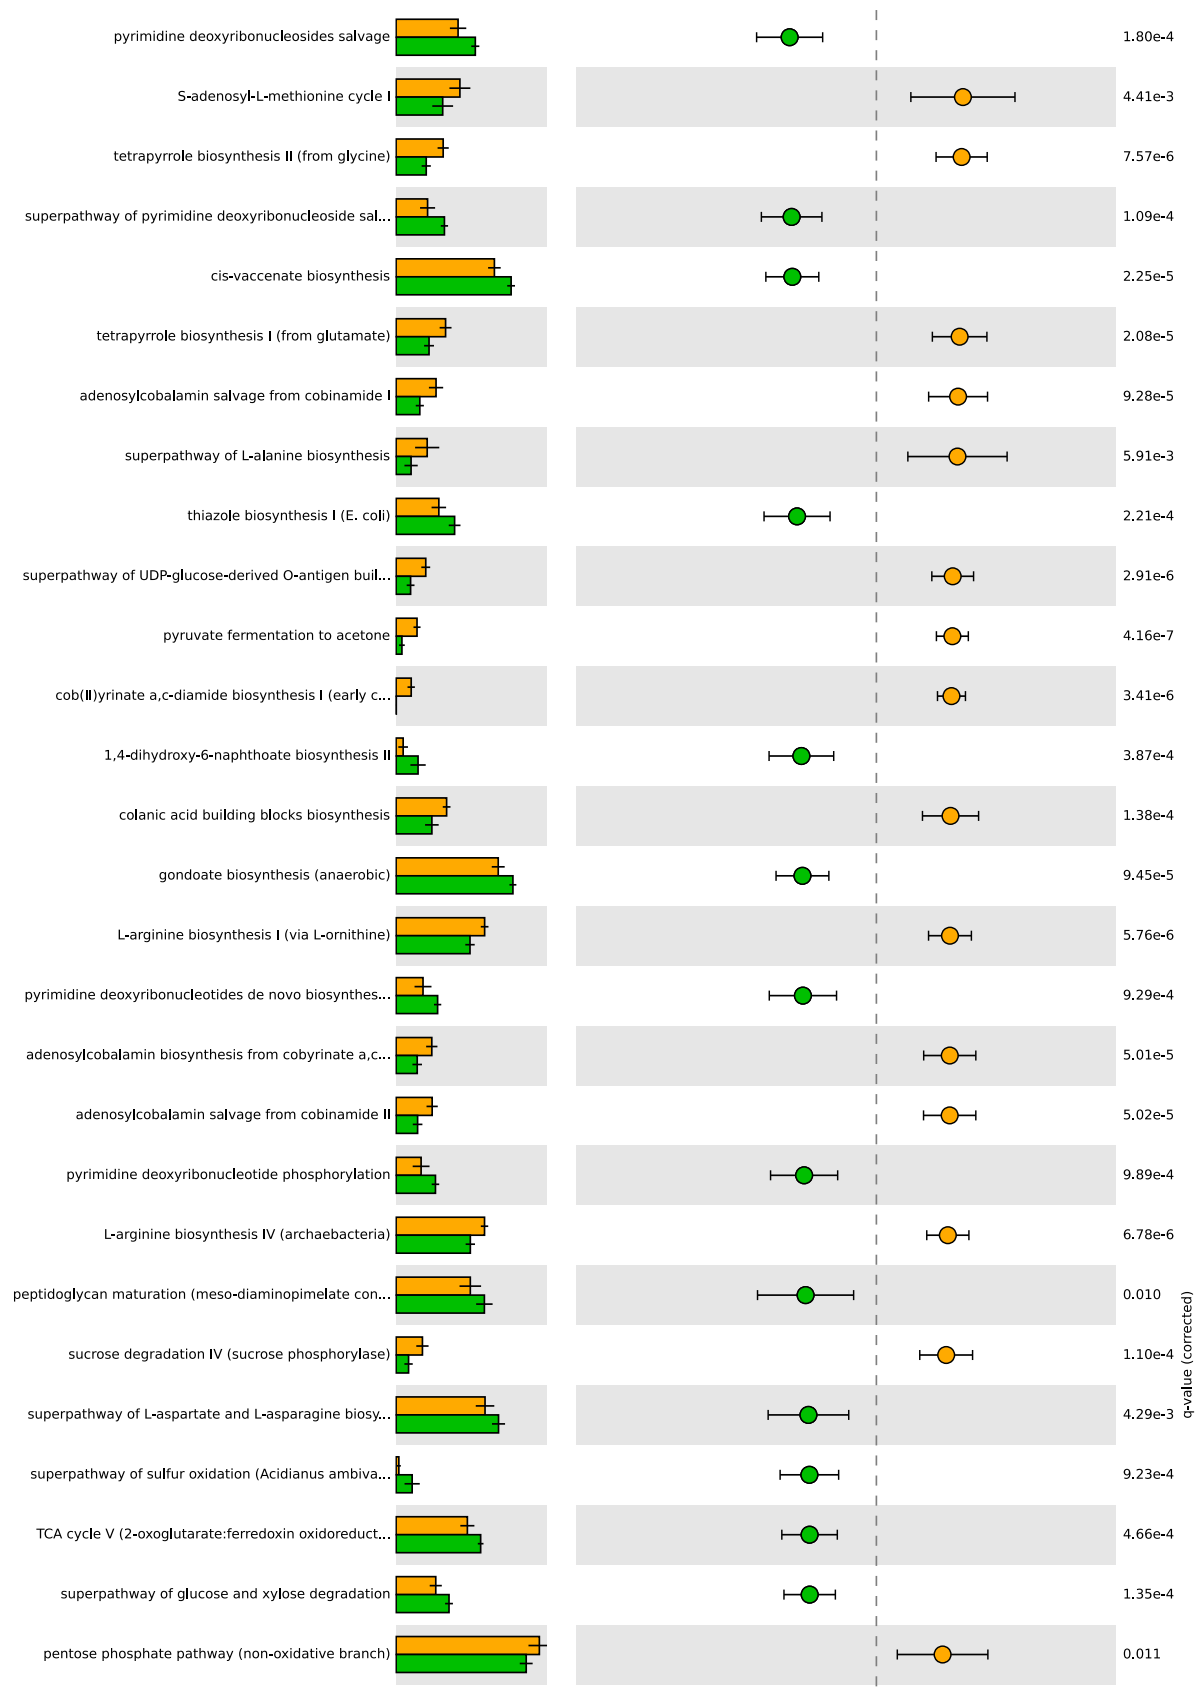



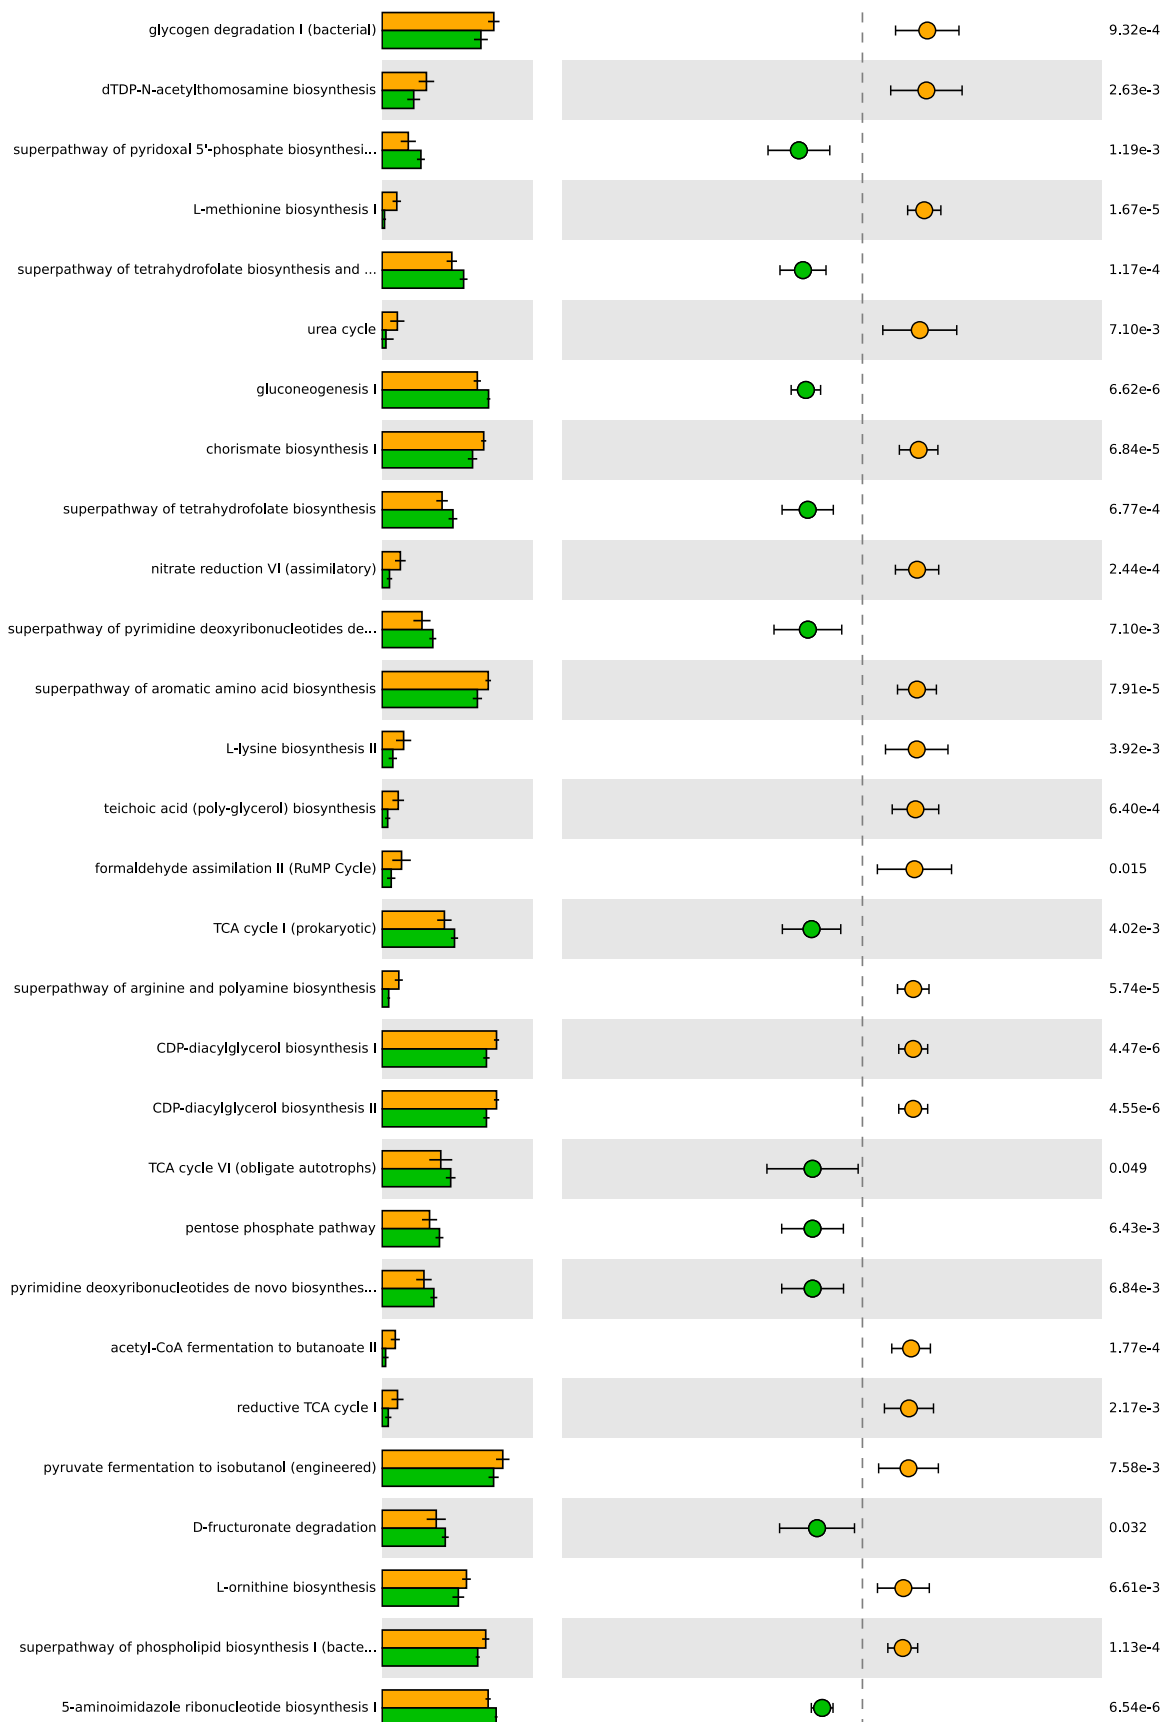

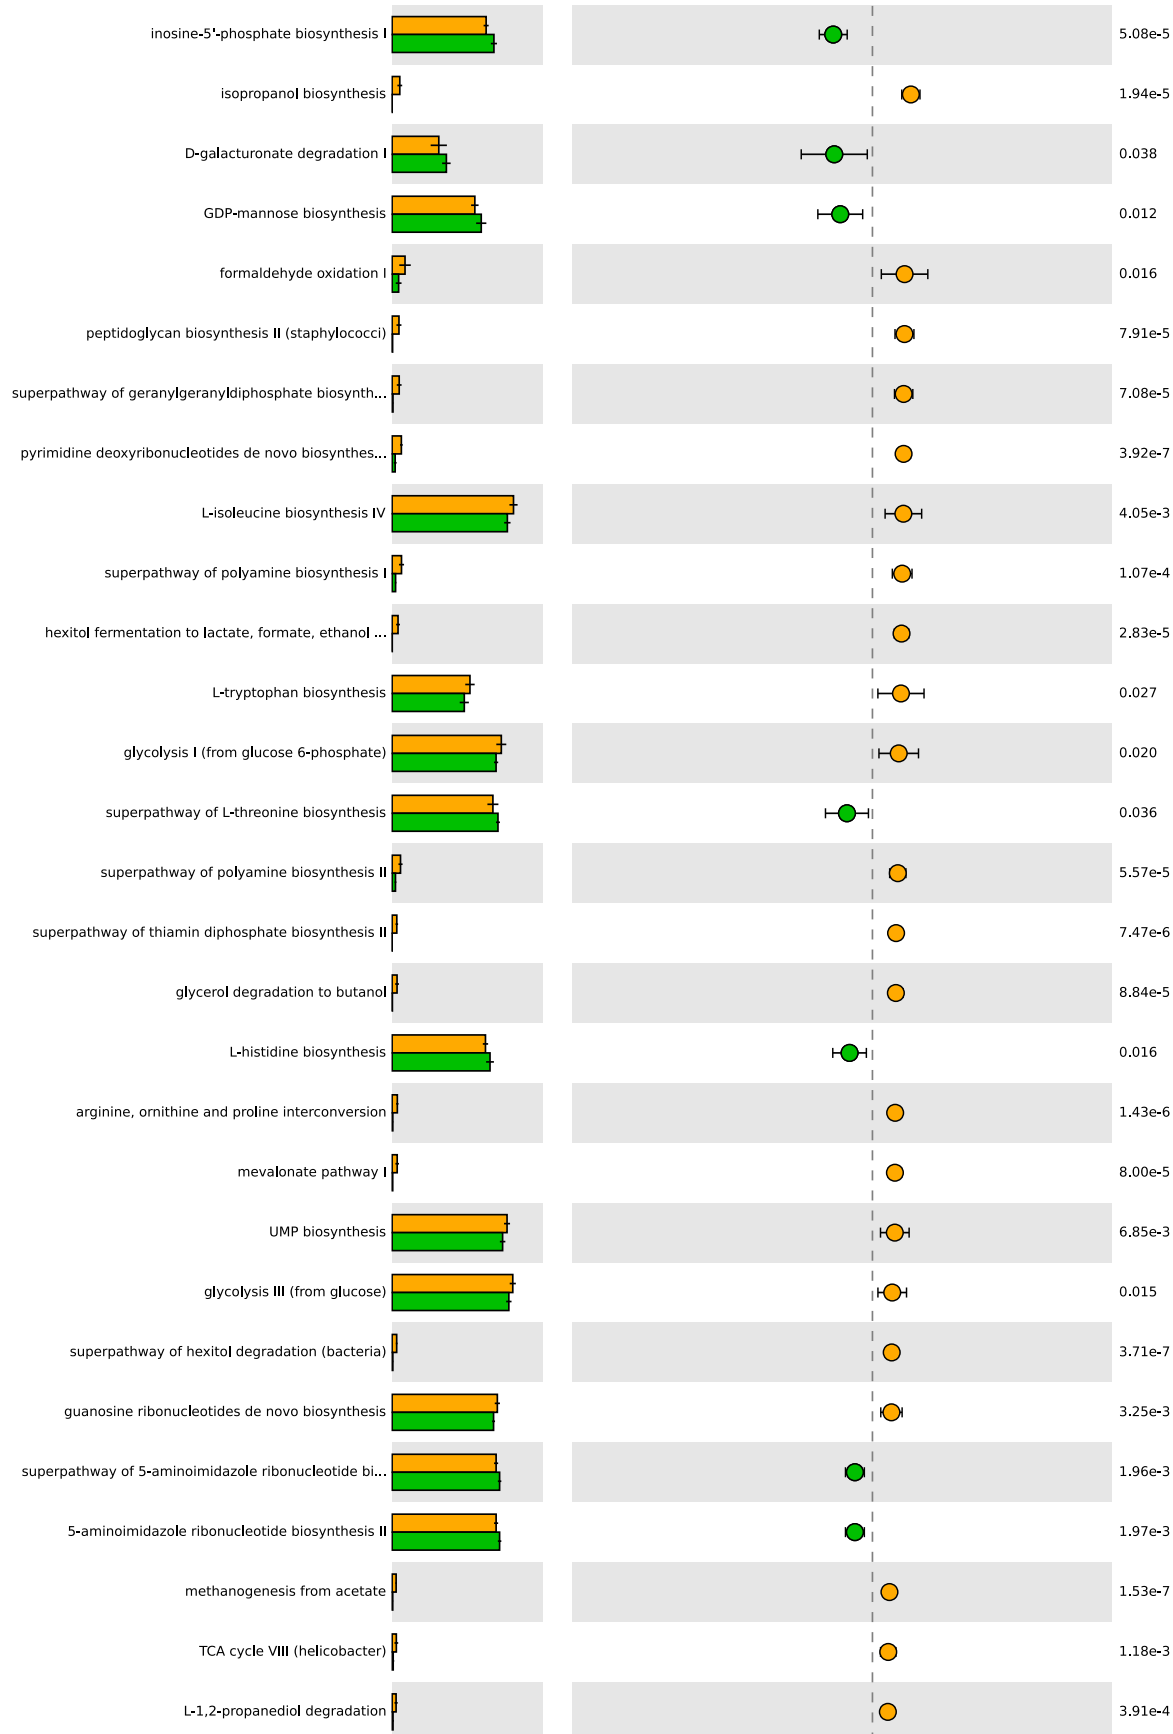

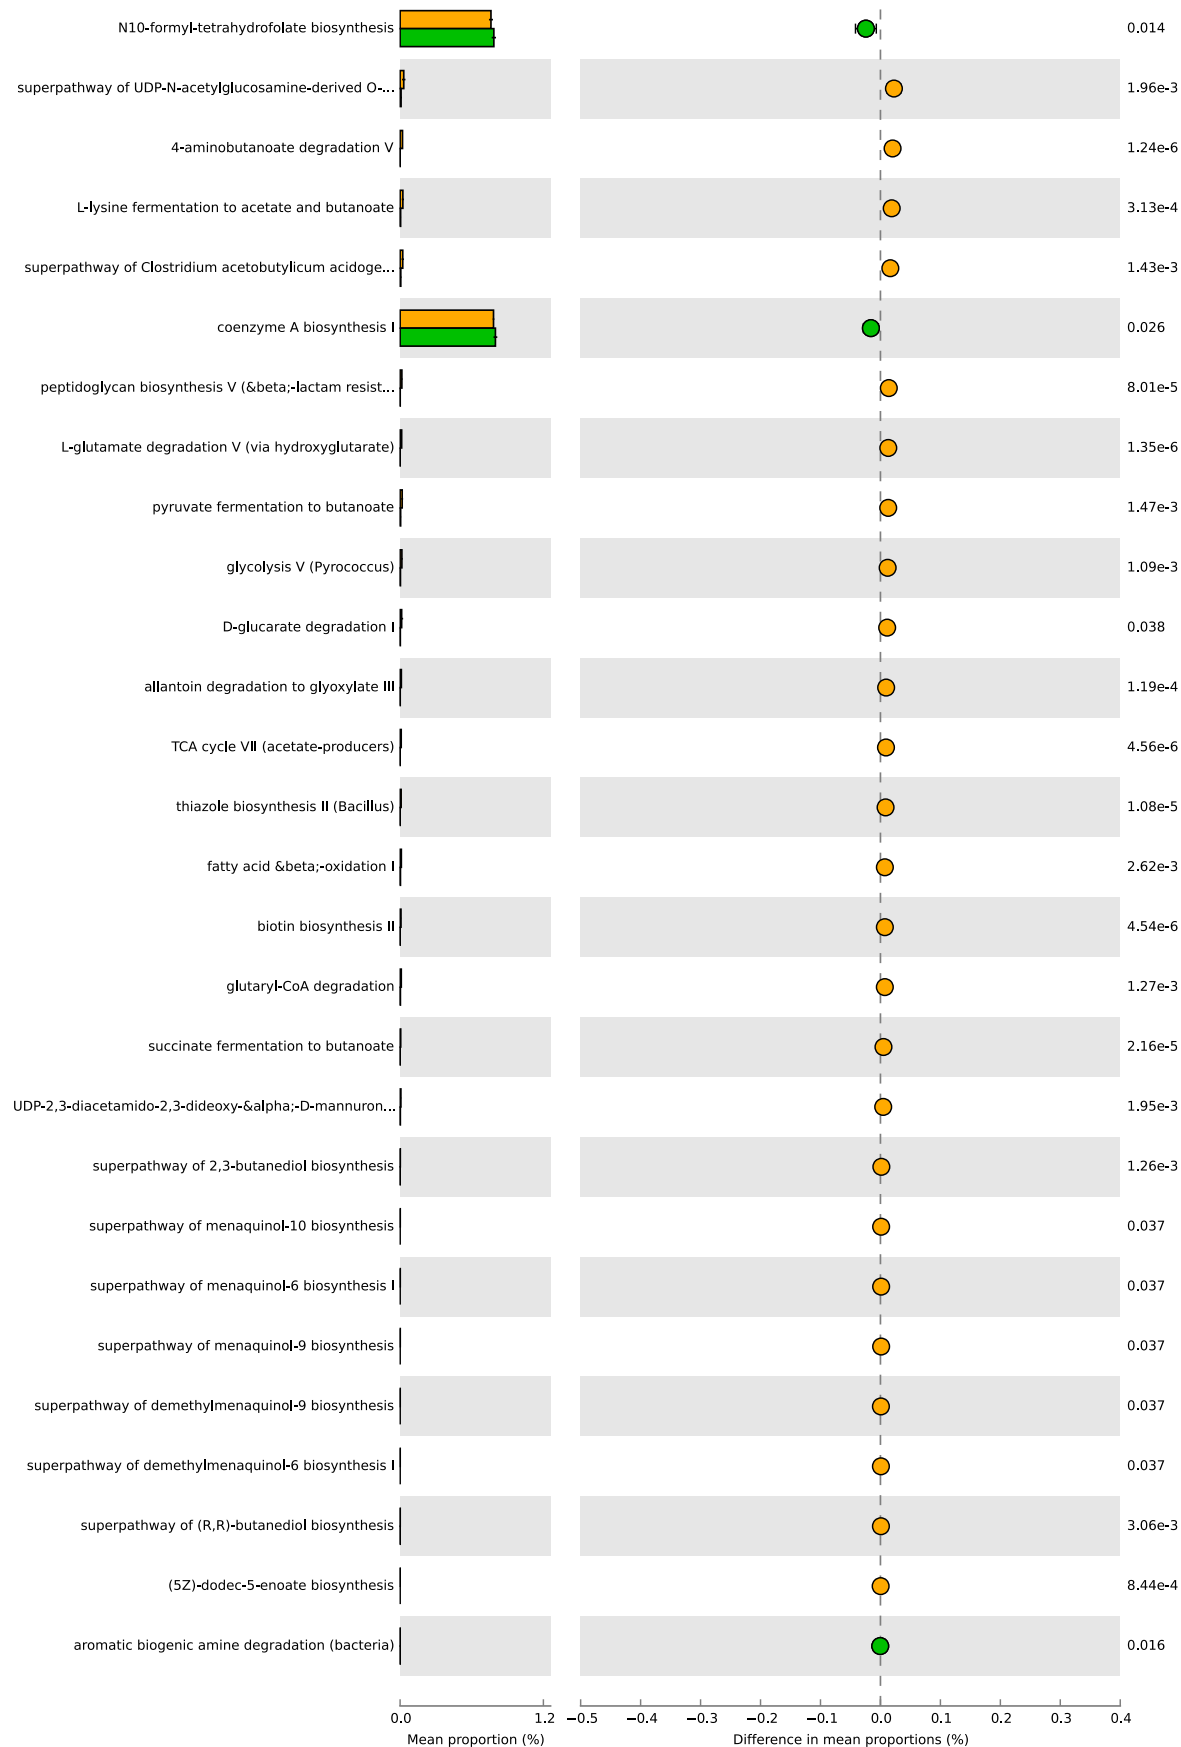

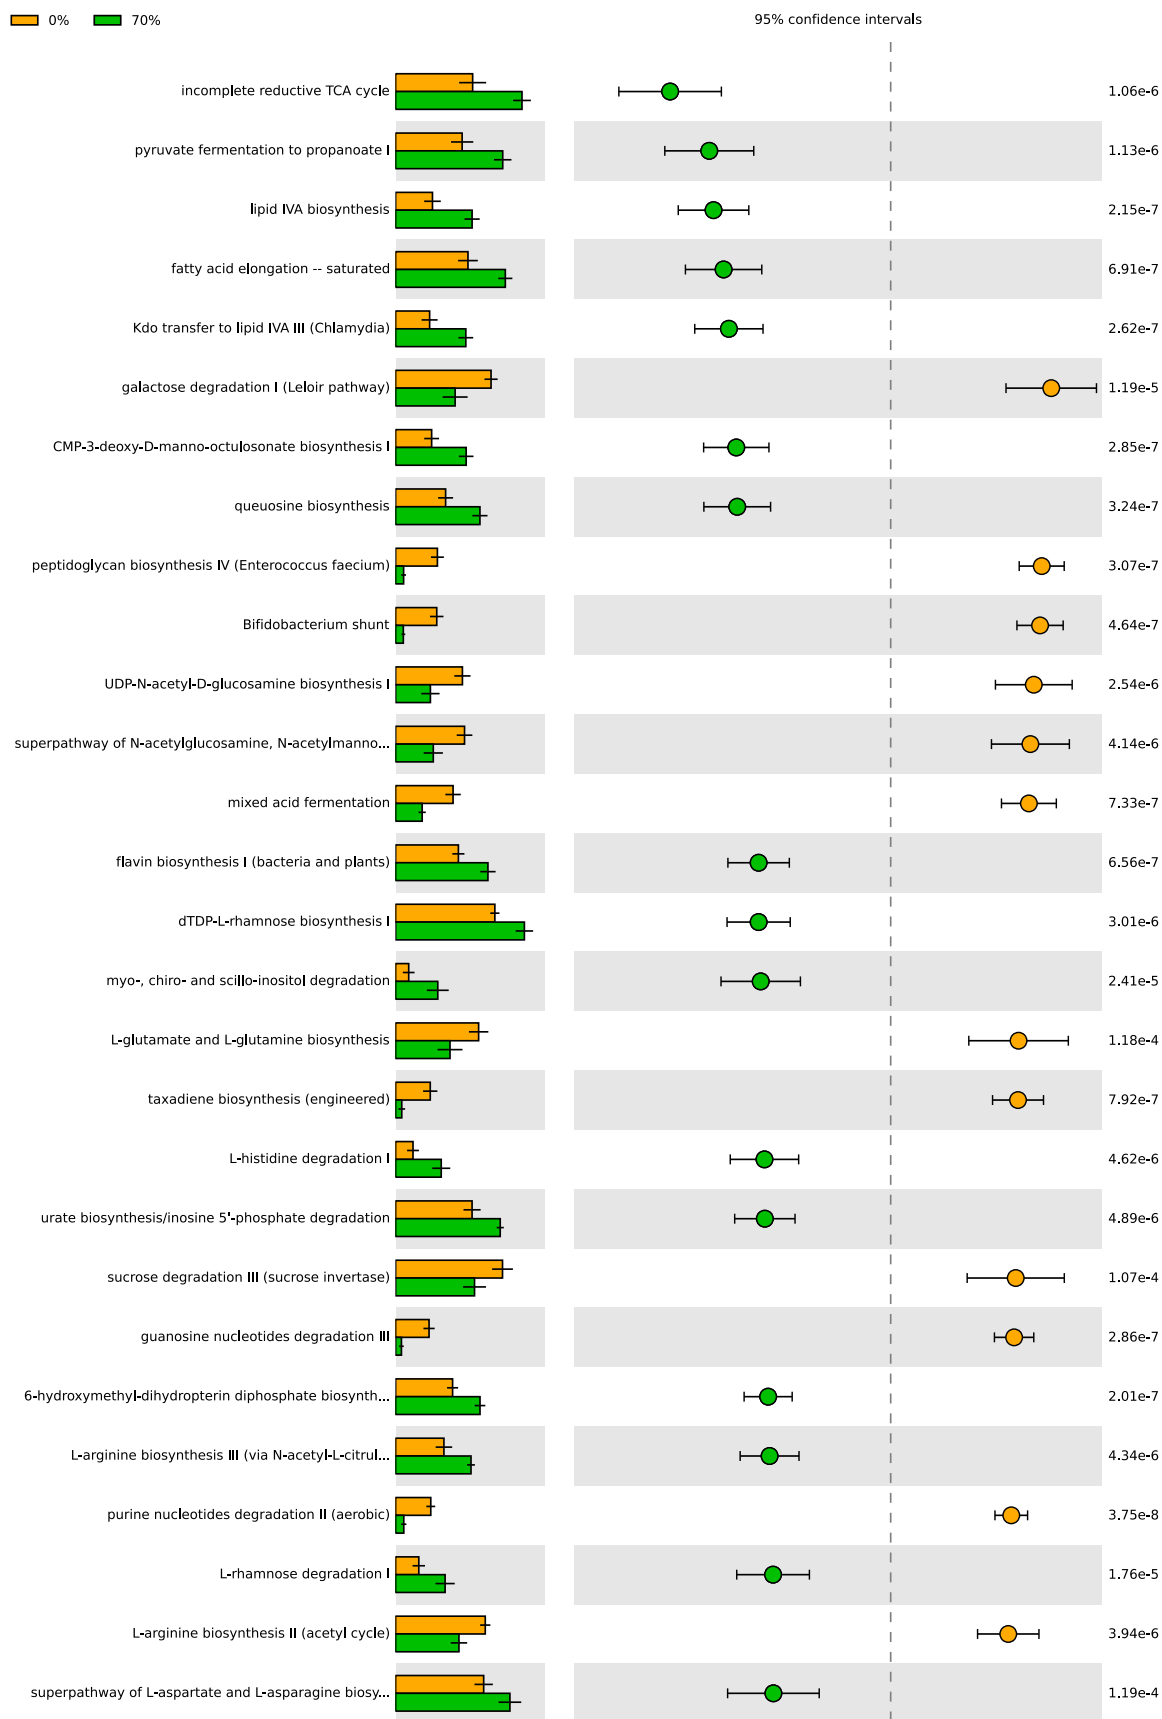

C.

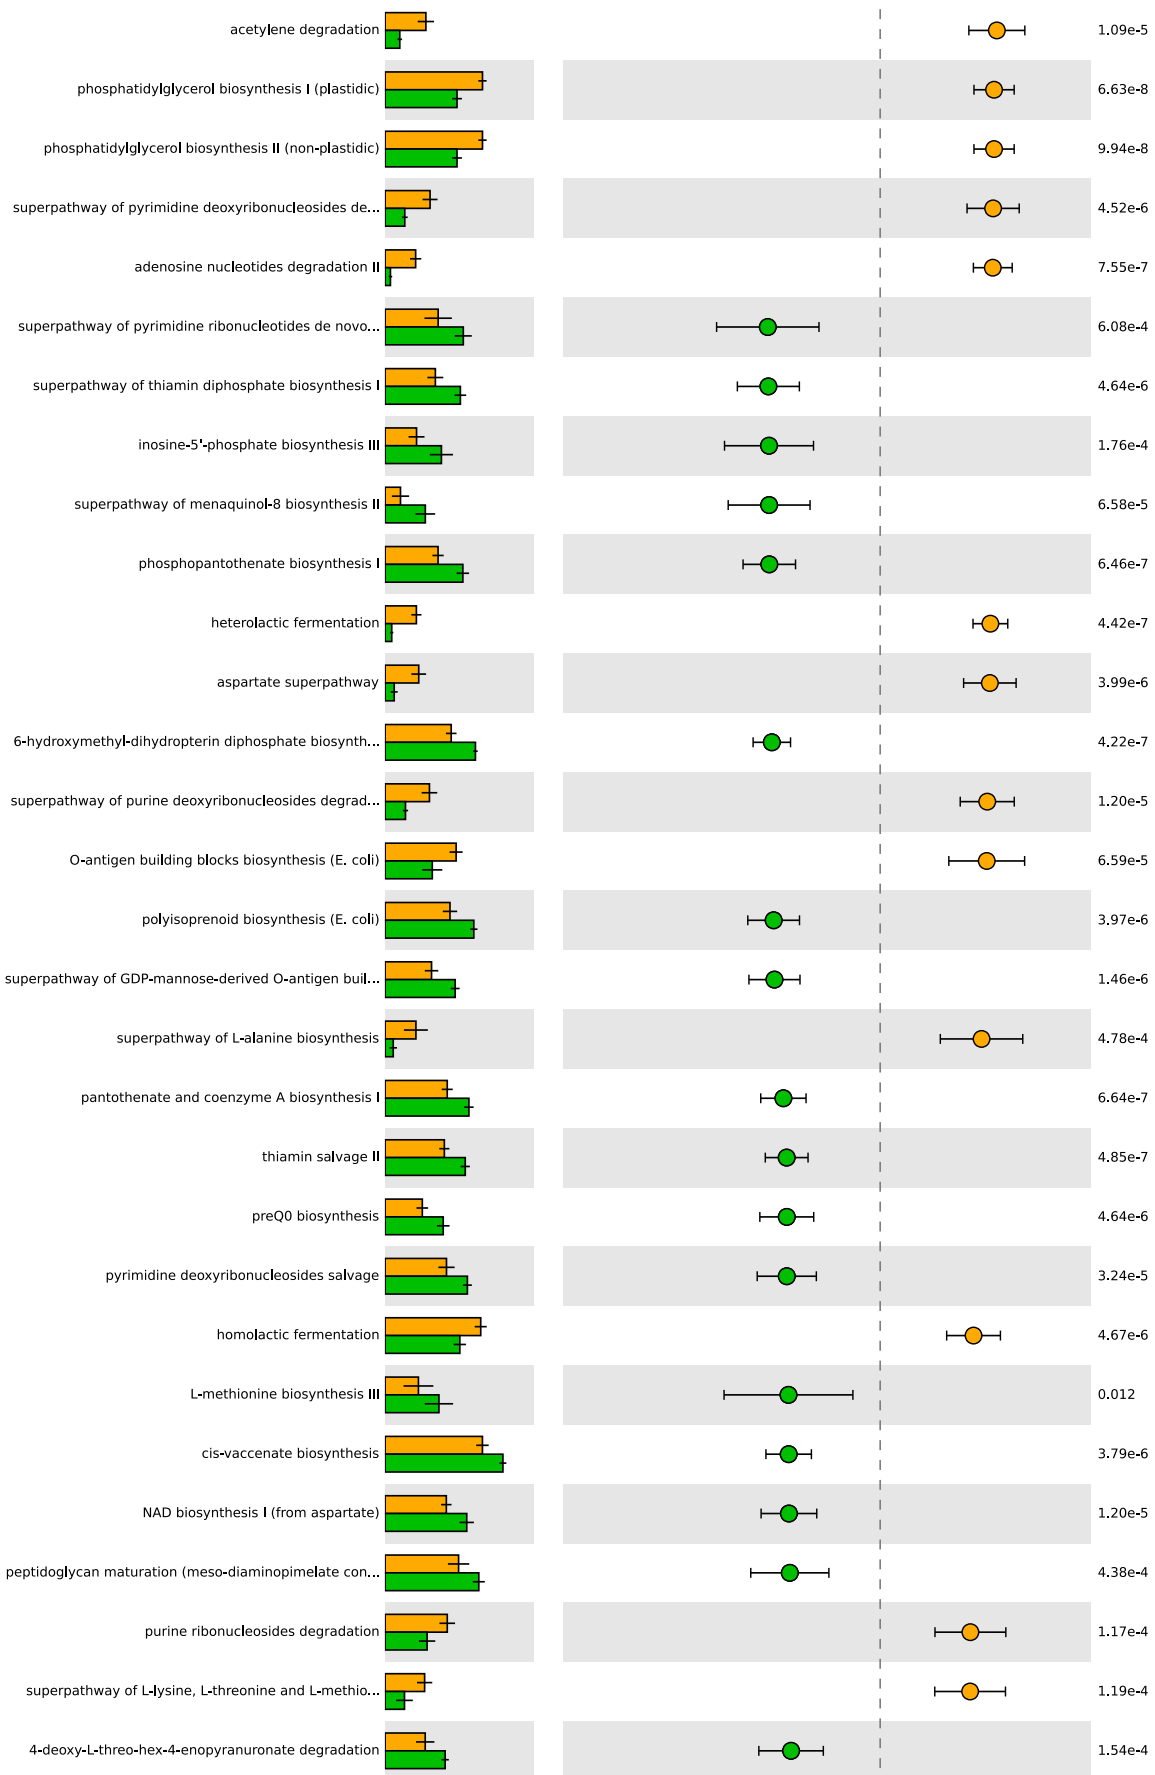

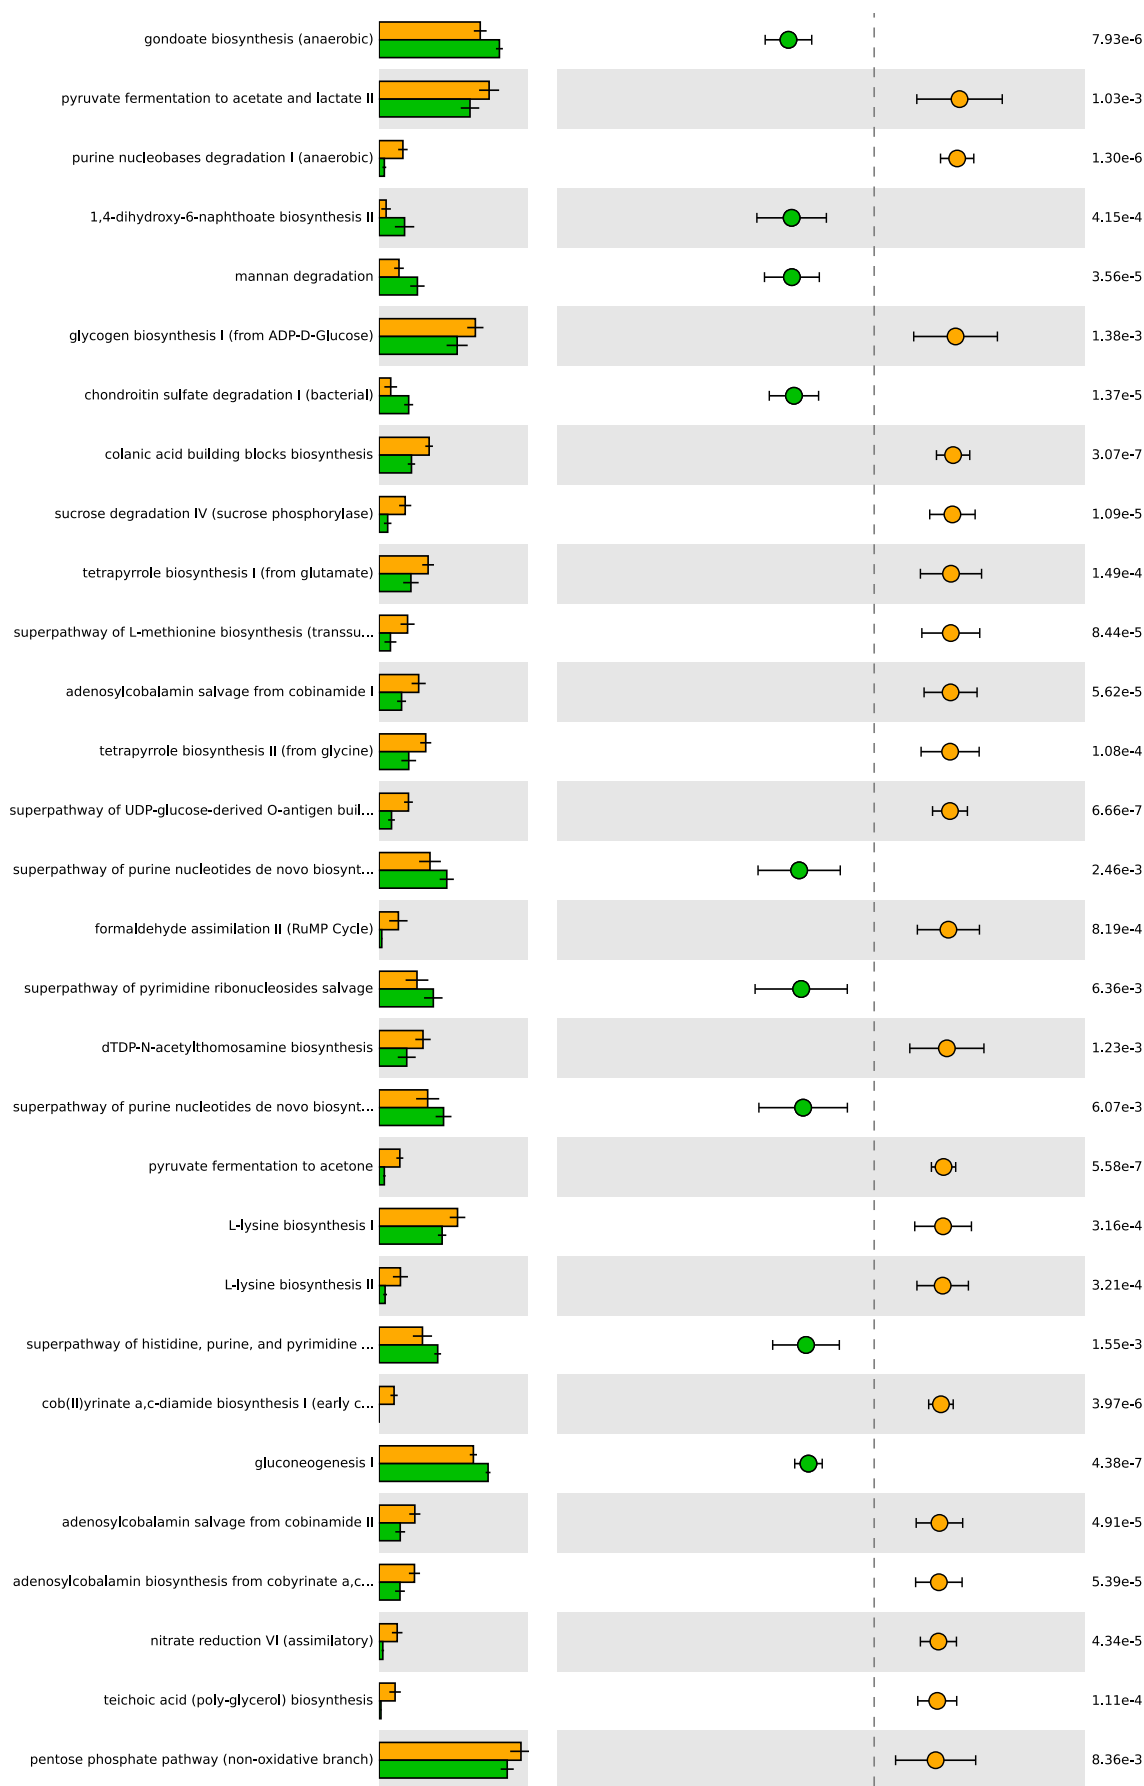

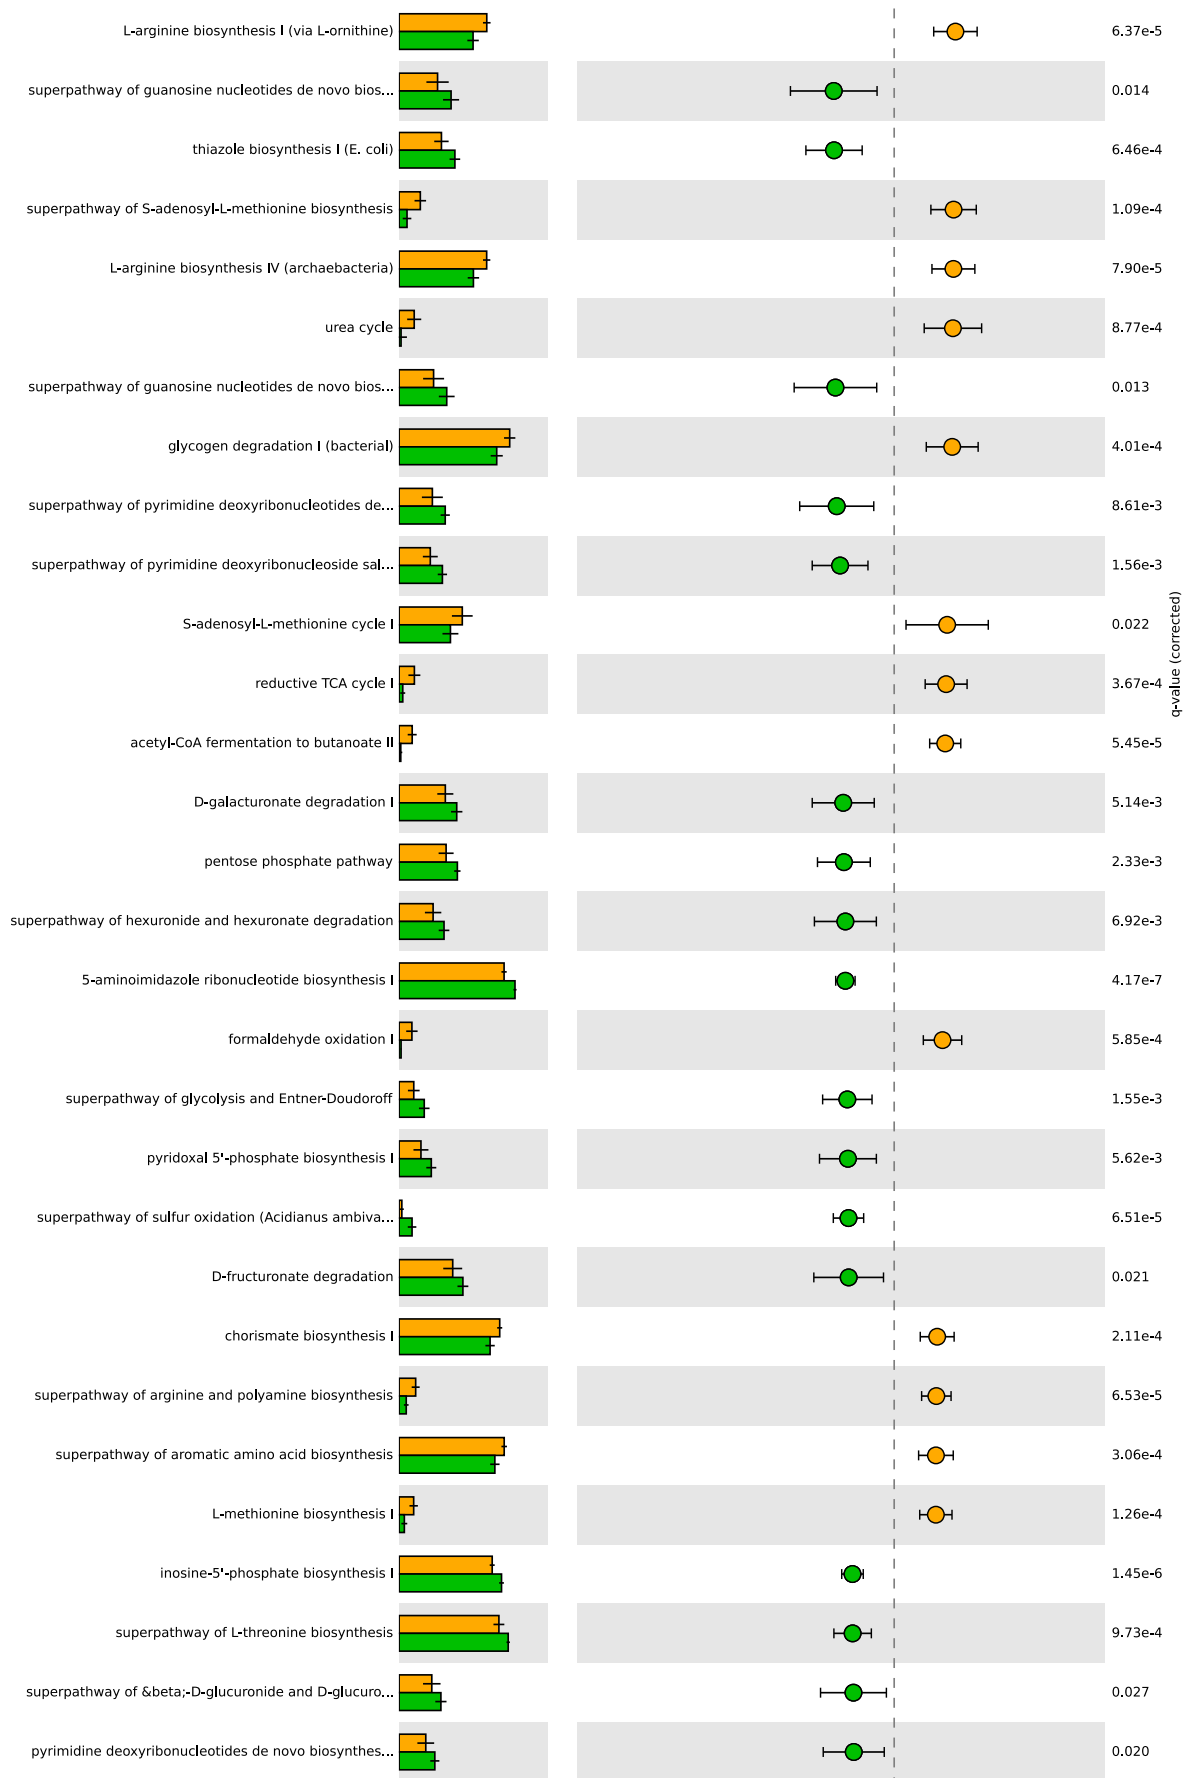

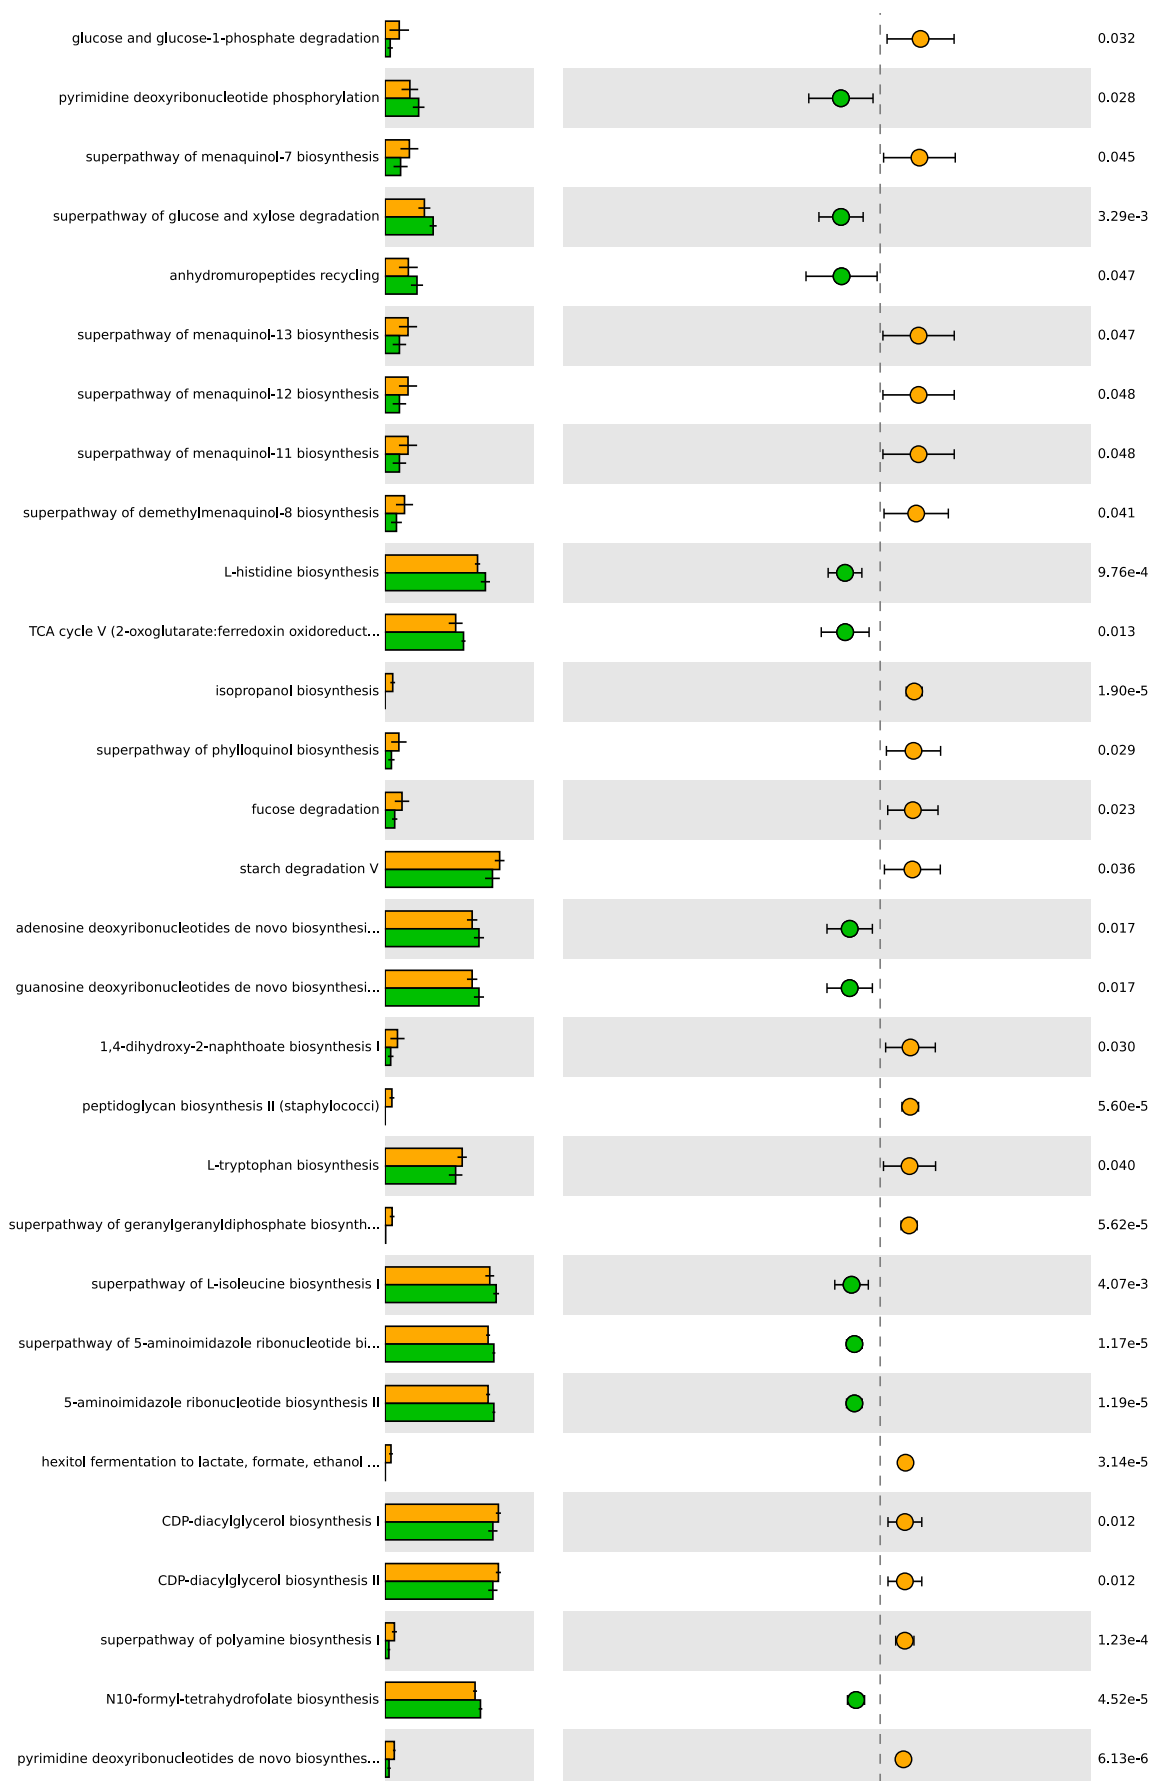



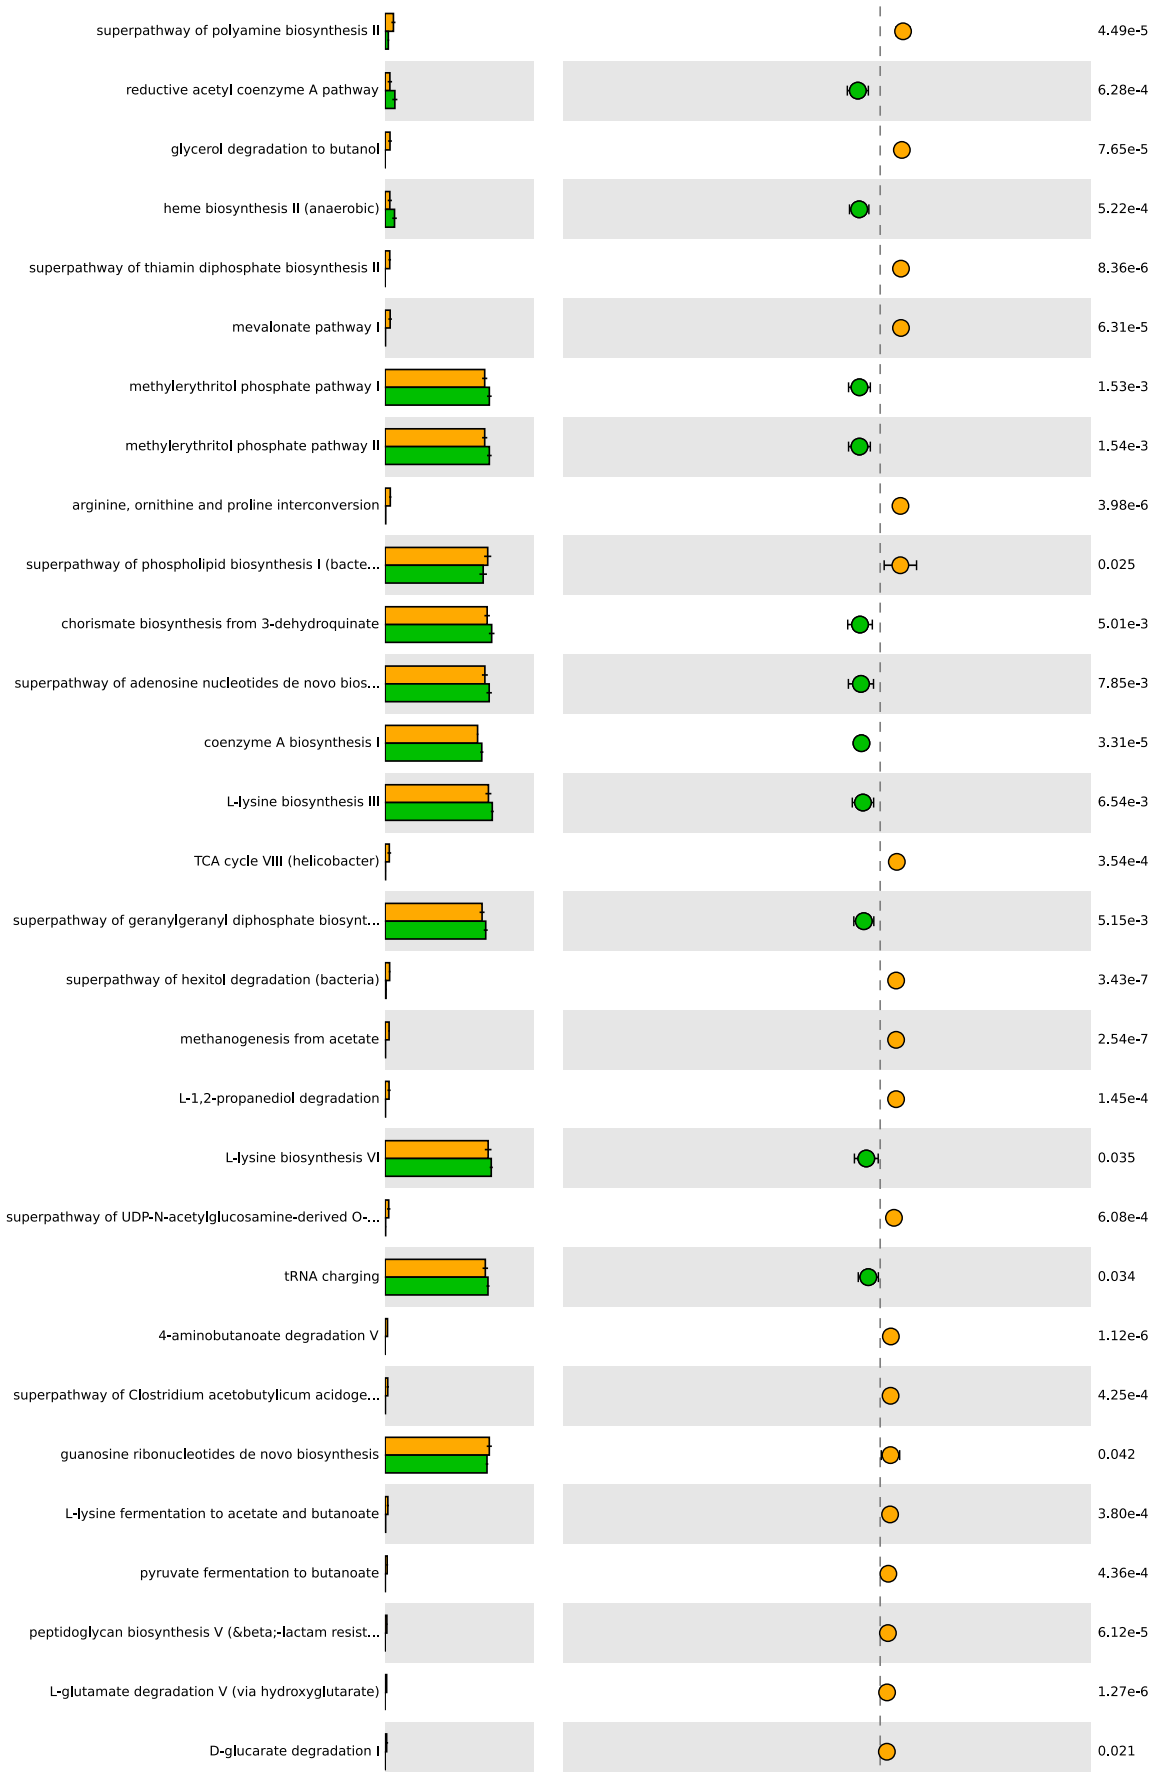

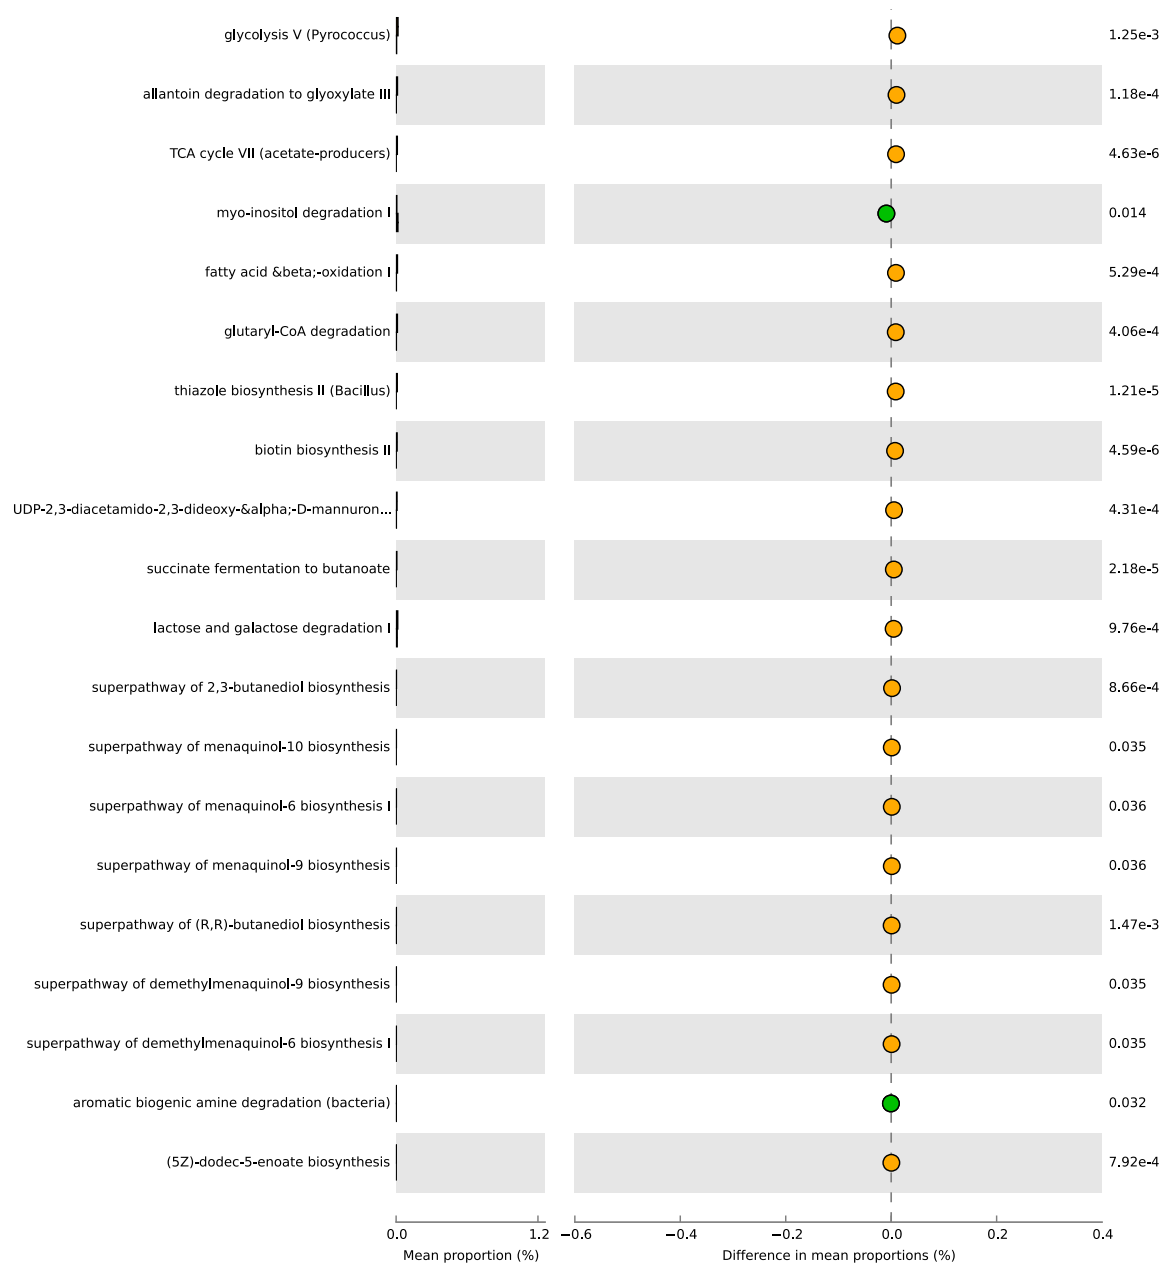

**Figure S8.** PICRUSt2 results indicating differential predicted functional pathways between the bean-free and the bean-containing diet groups in the female cohort: **(a)** 152 pathways in 0% vs 17.5% bean; **(b)** 183 pathways in 0% vs 35% bean; **(c)** 198 pathways in the 0% vs 70% bean. The bean-free diet (0%) is indicated in beige, while the bean-based diet samples (17.5%; 35%, and 70%)—in green. Extended error bar plot indicating the mean proportion of pathways assigned to each group, difference between them, and corrected *p*-value (*q*-value) of each.

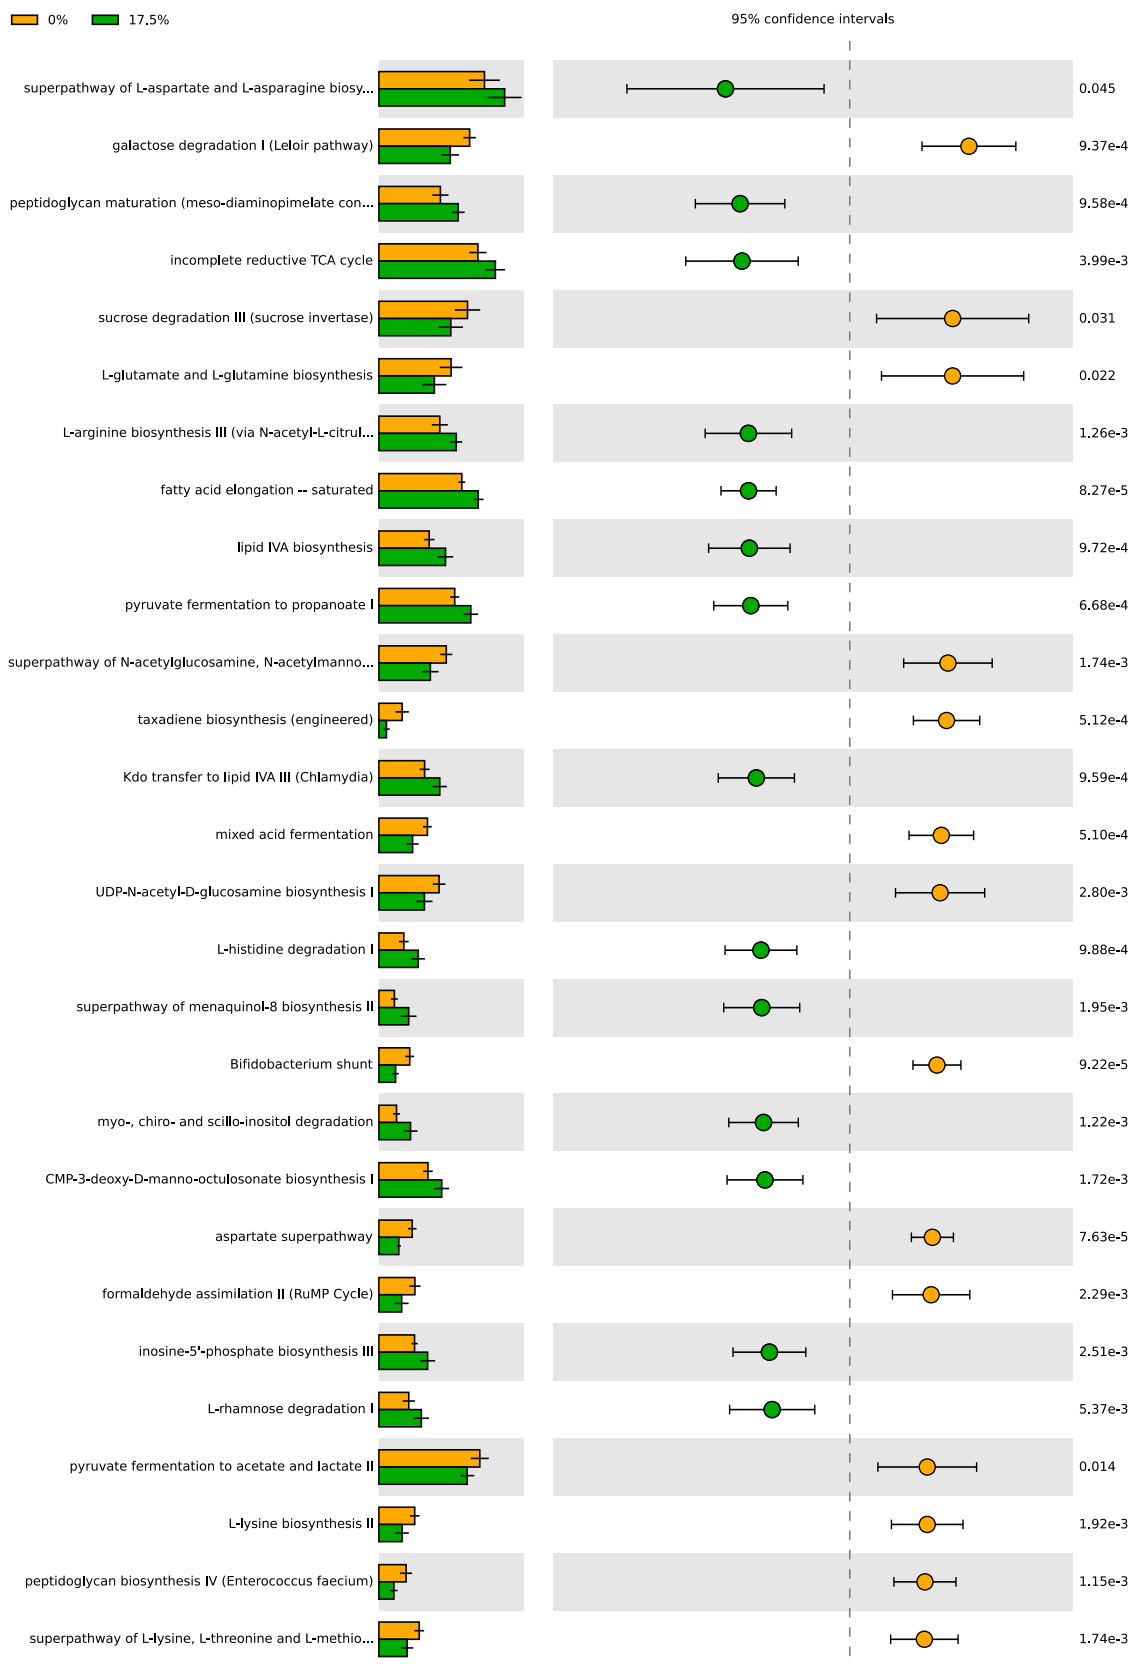

a.

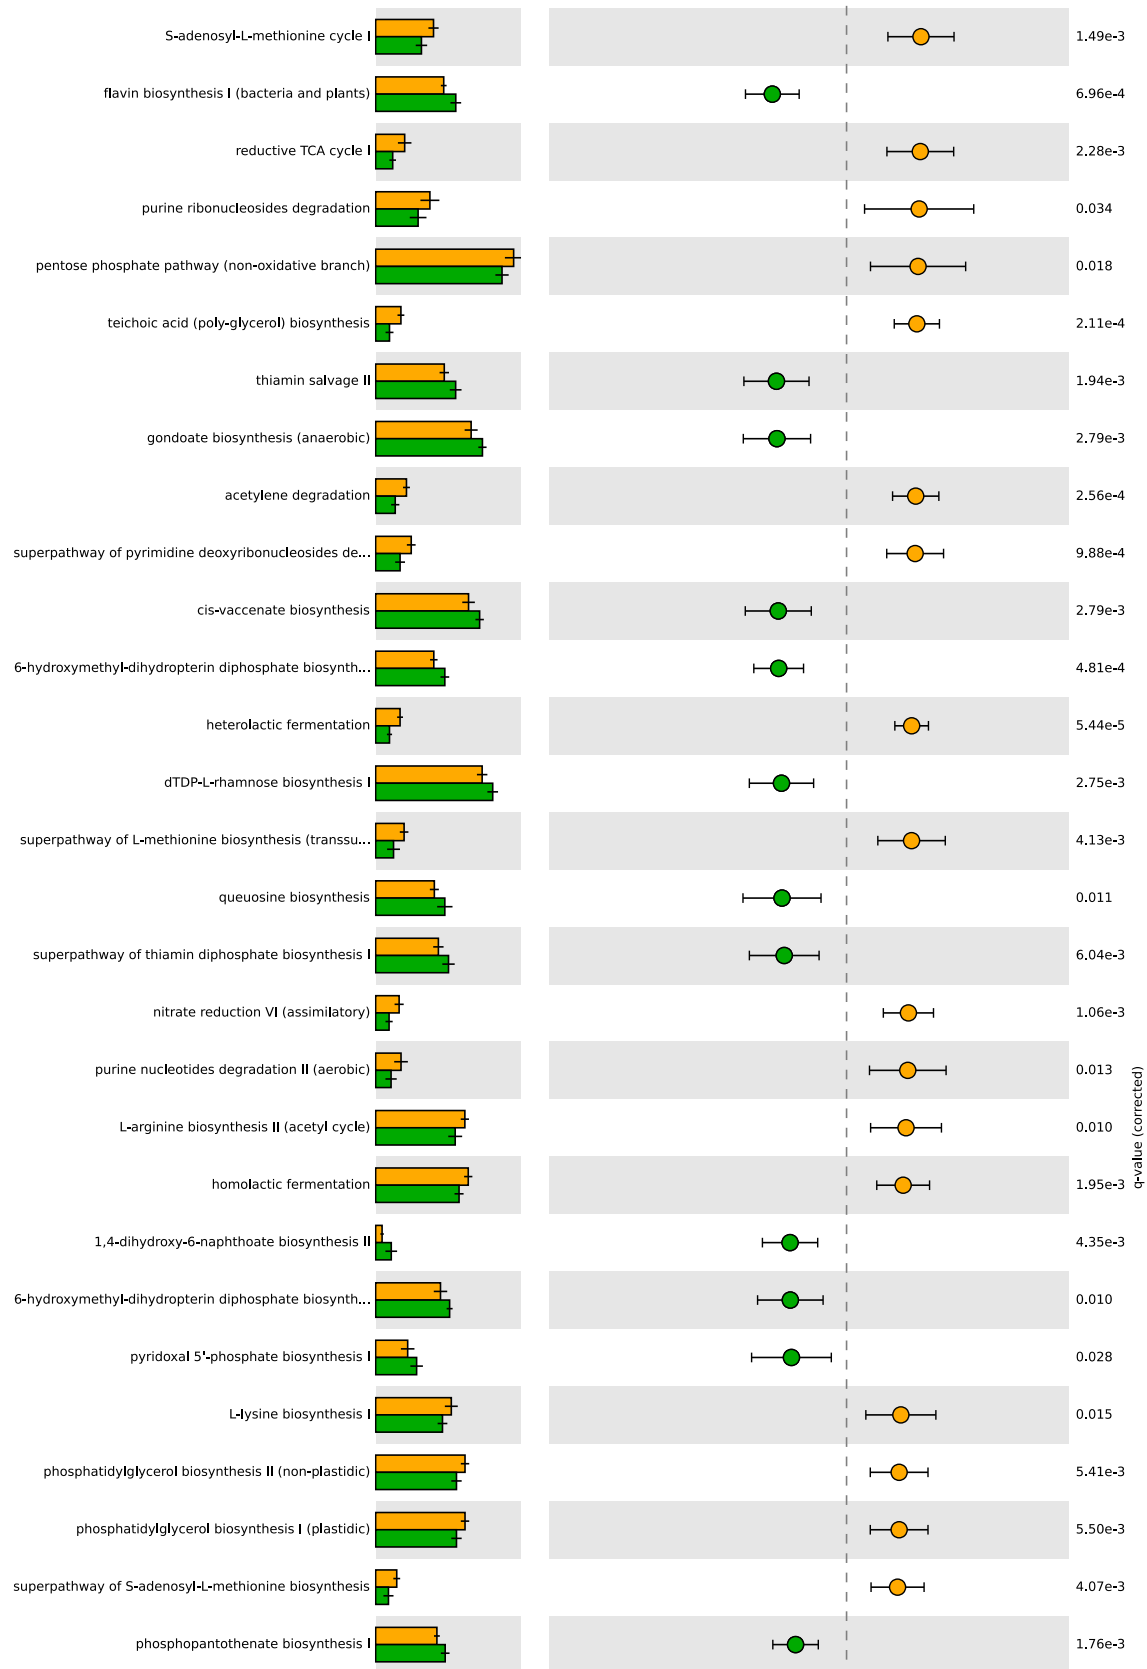

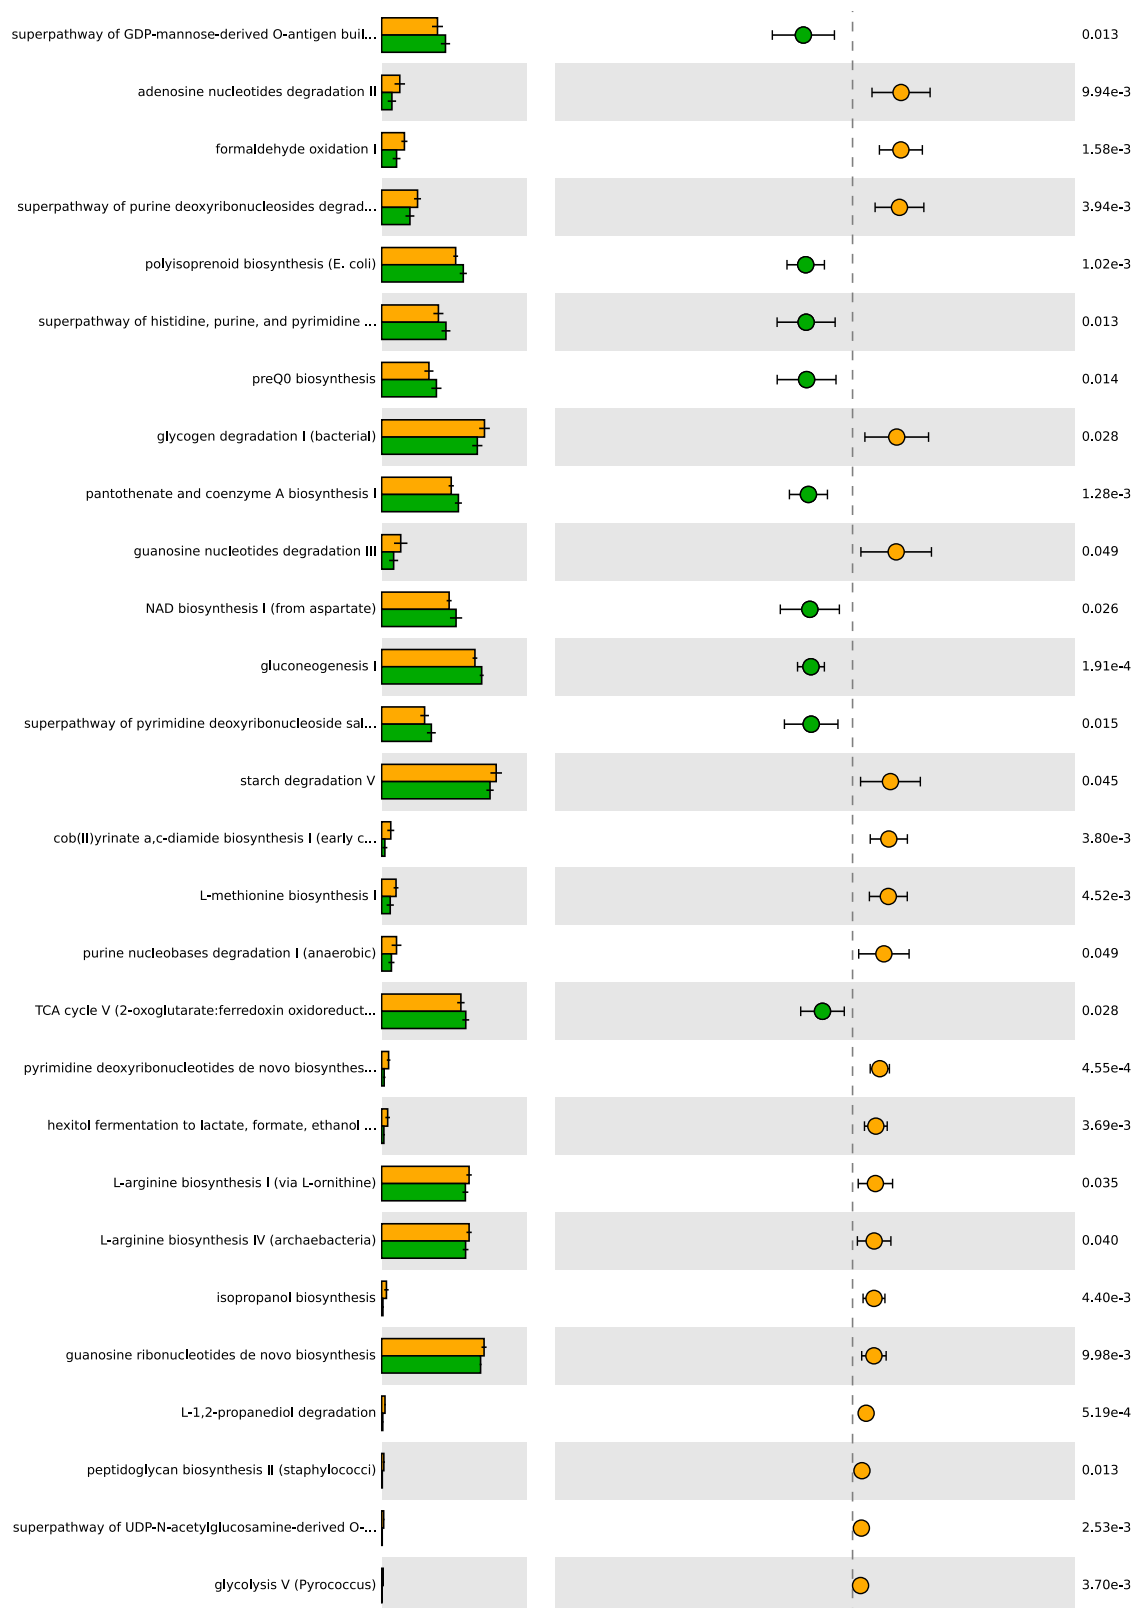

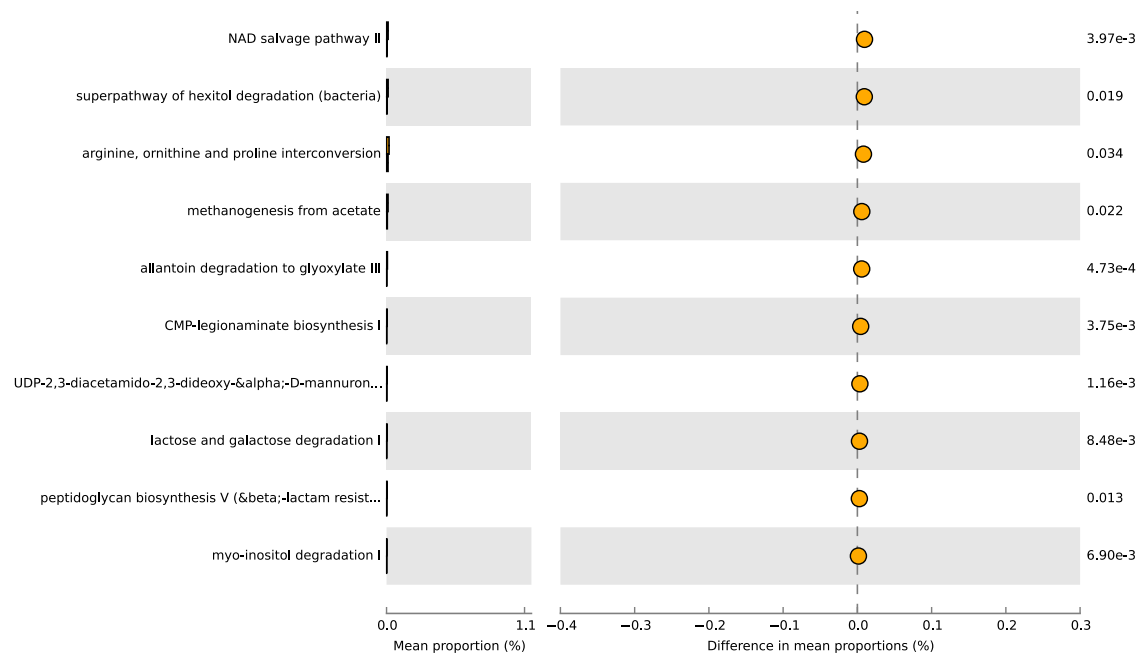

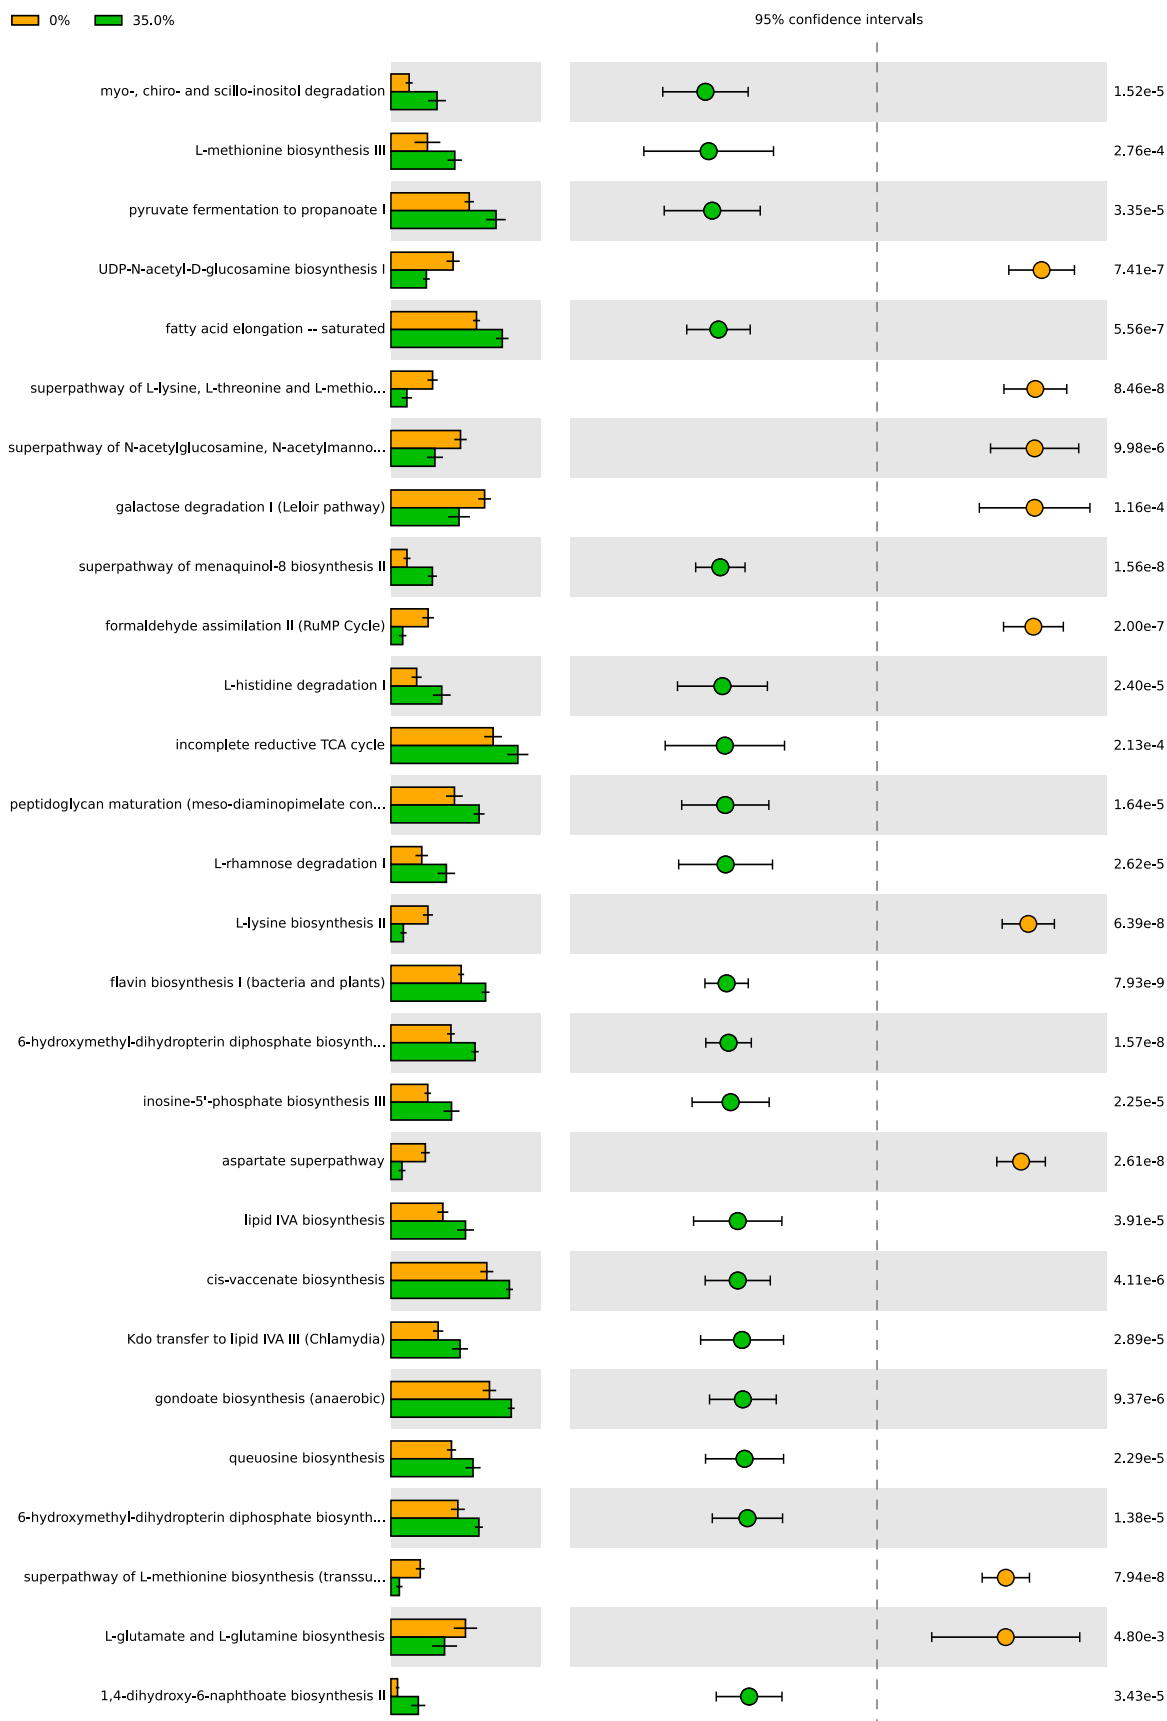

b.

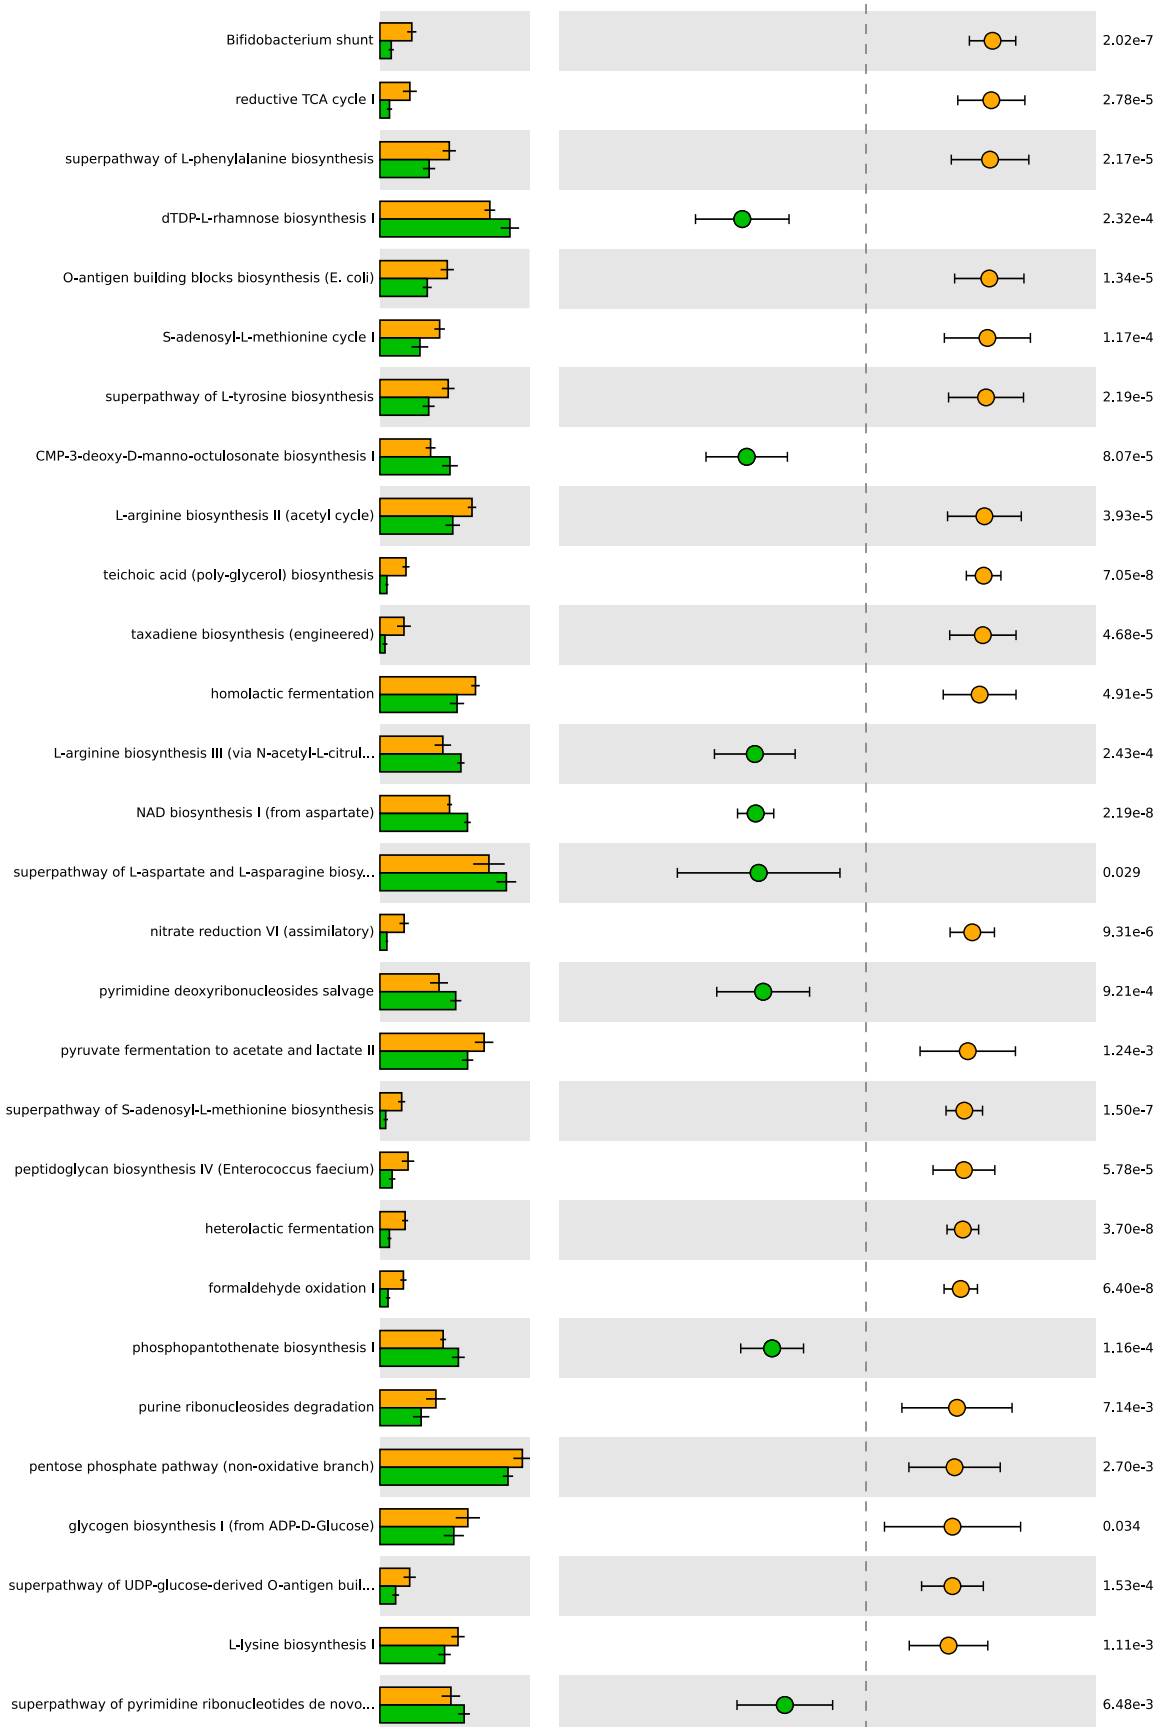



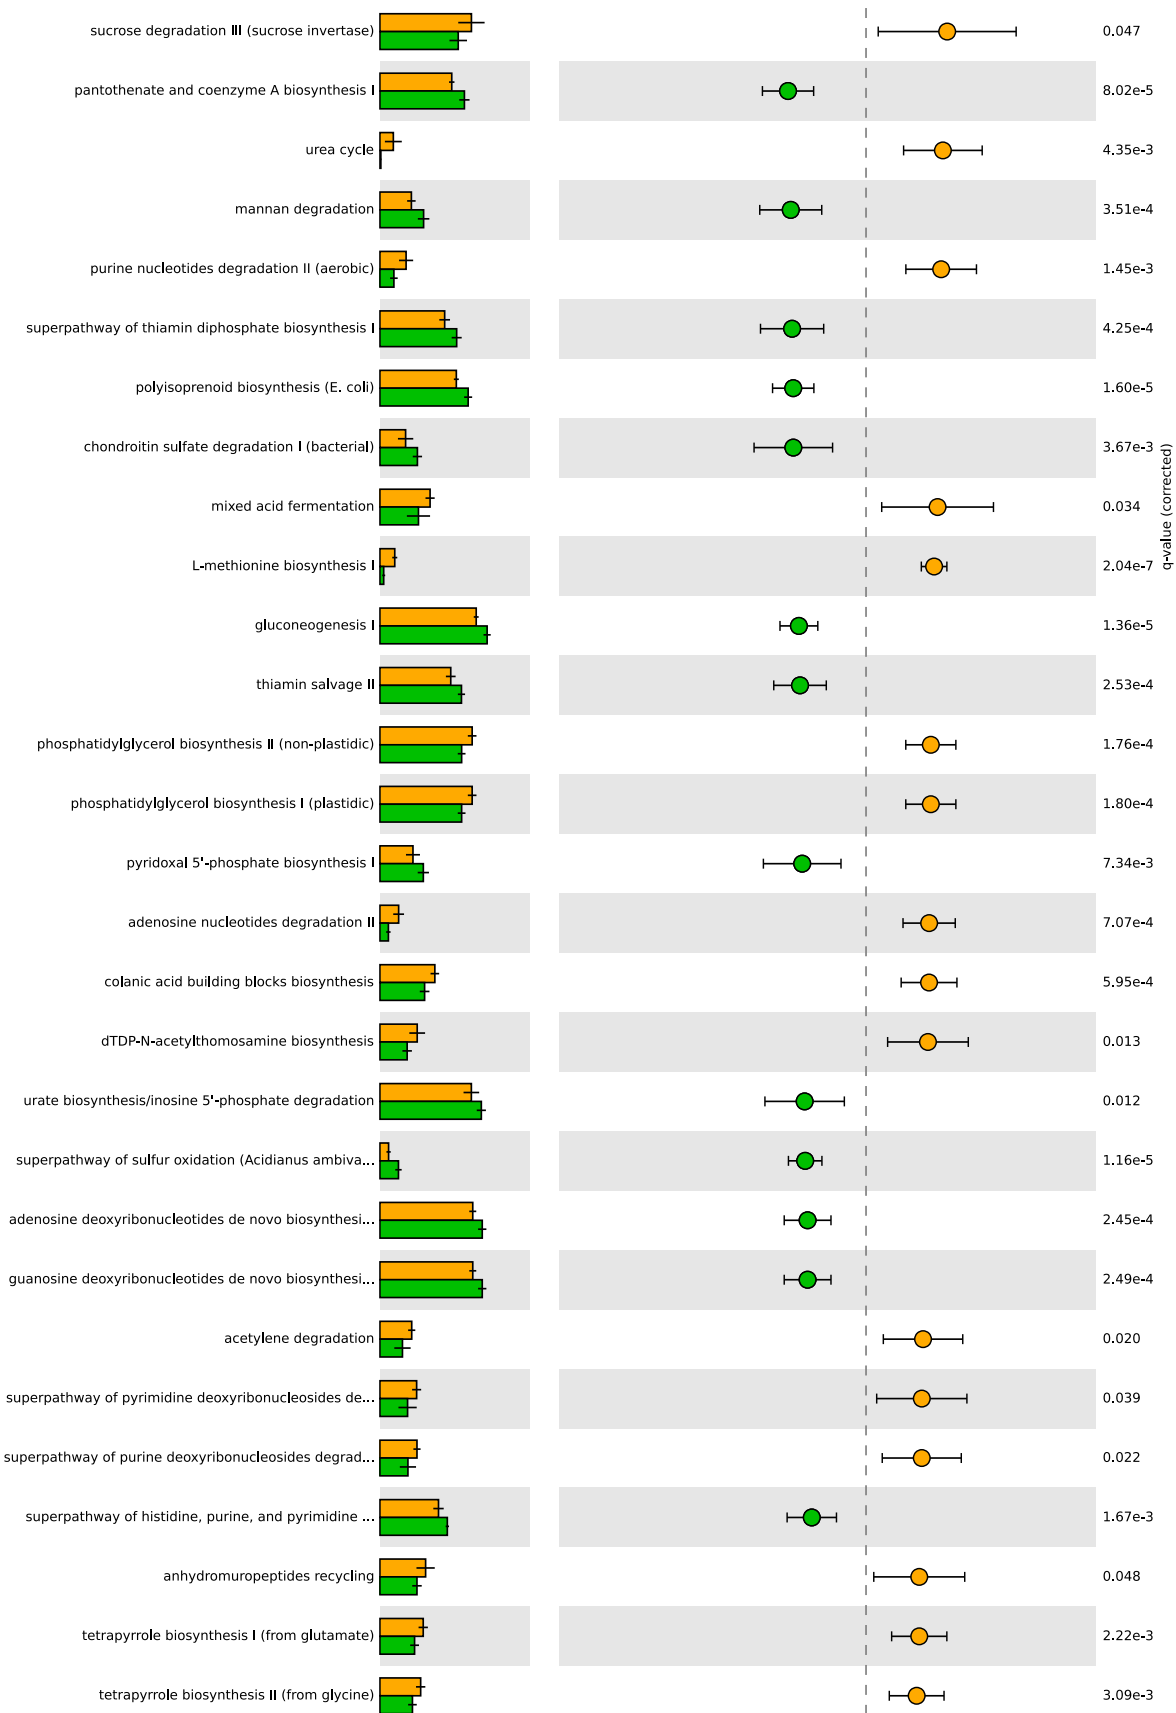

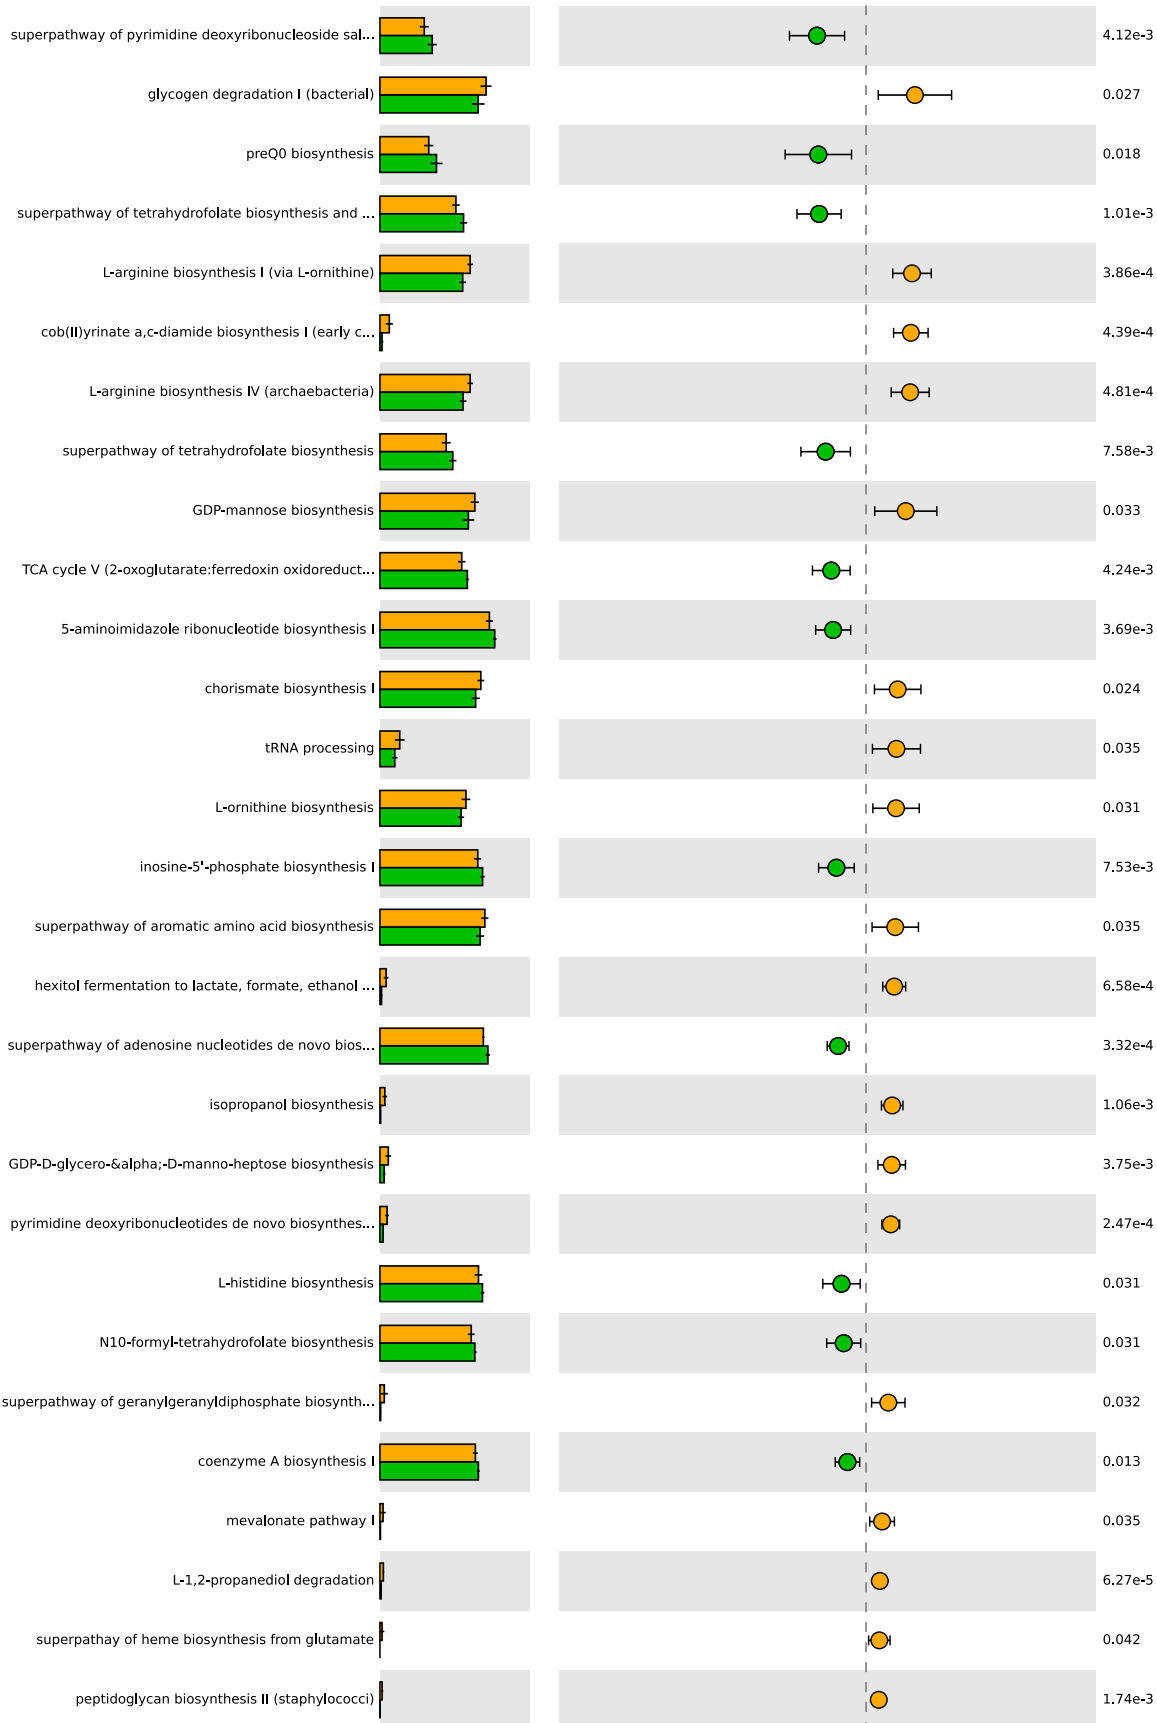

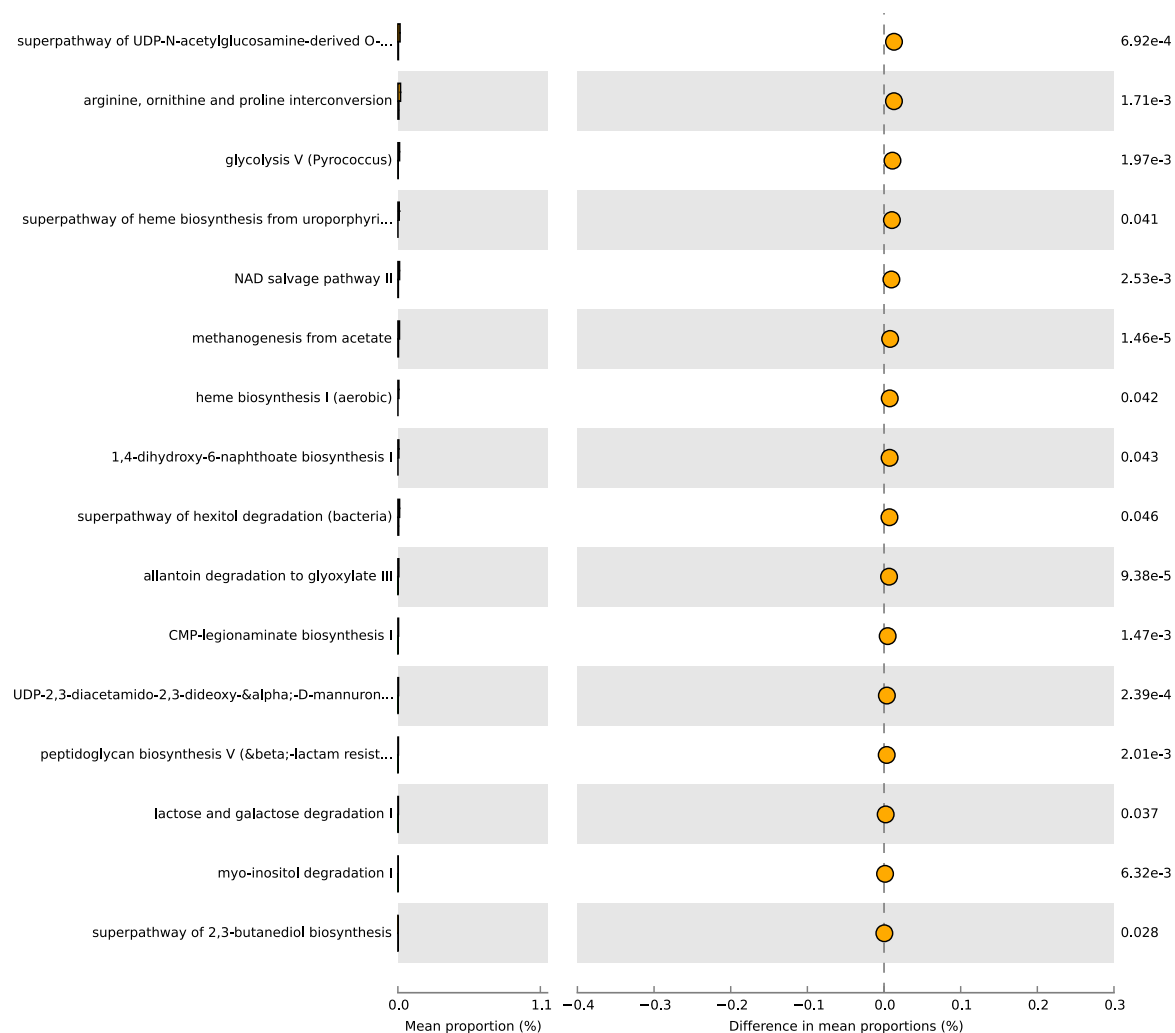

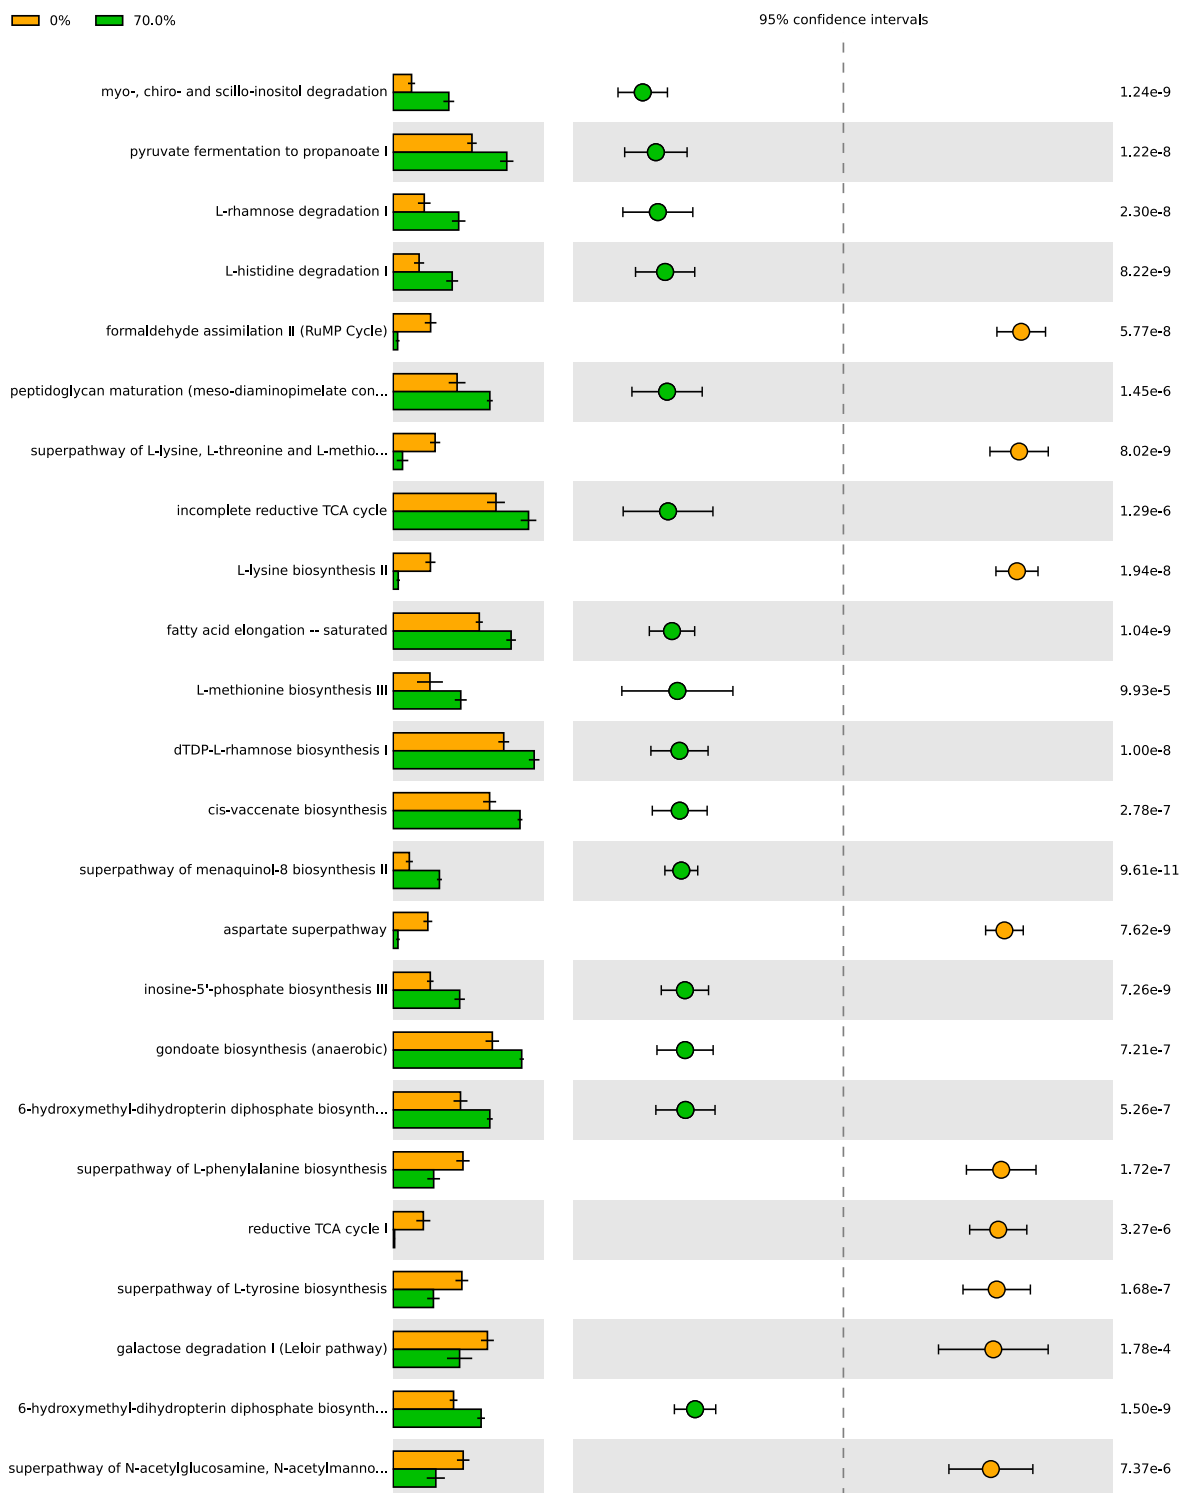

C.

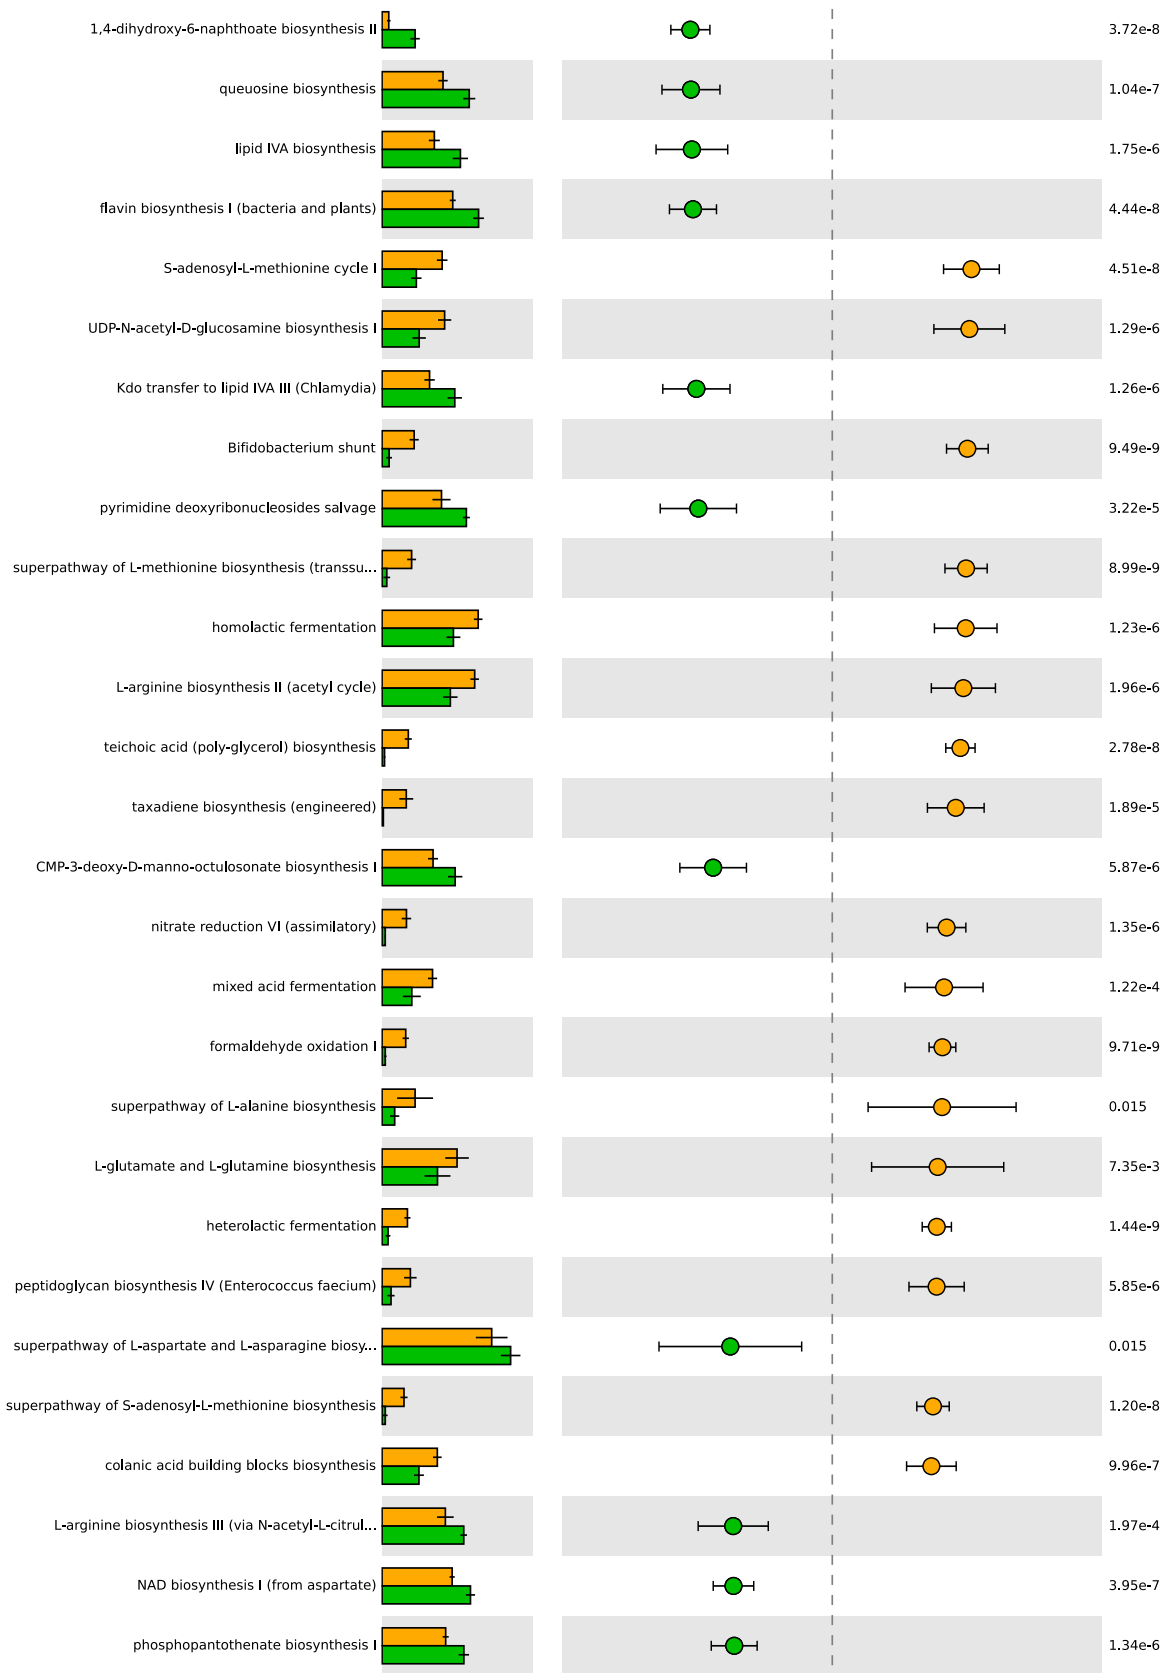

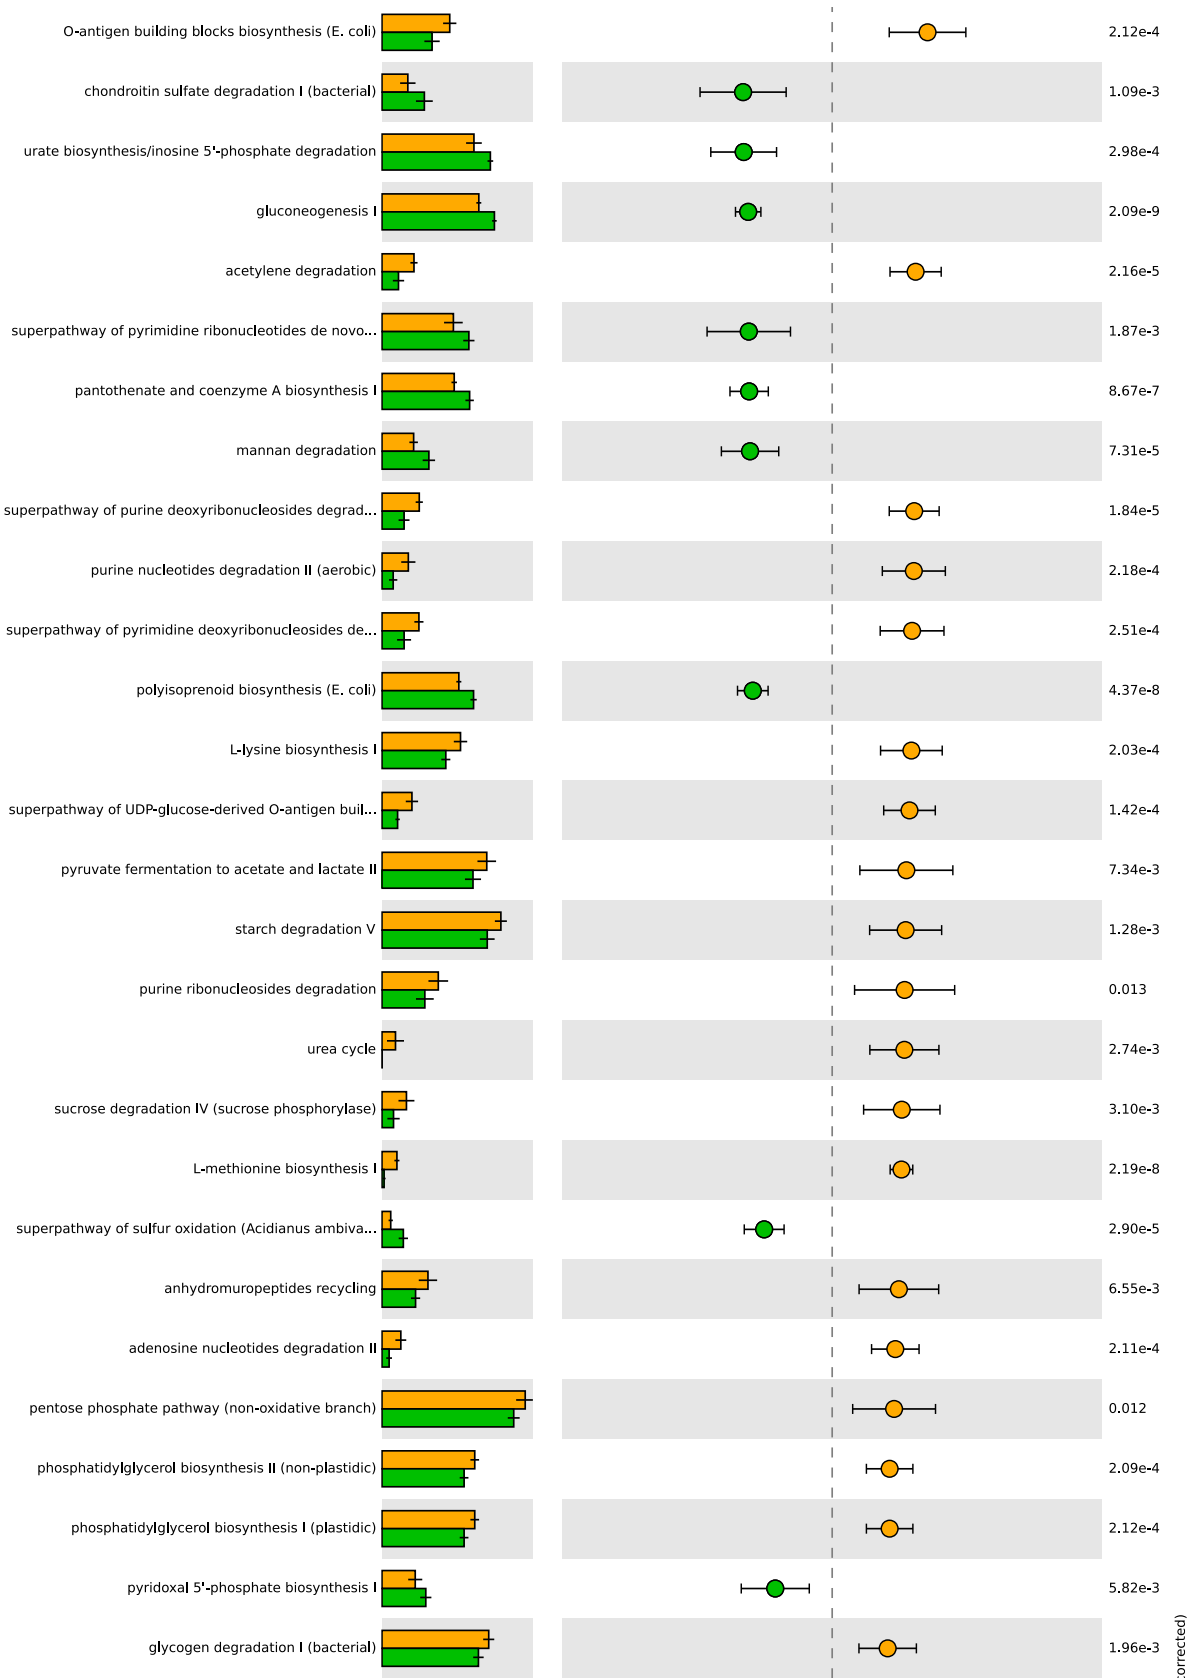

(corrected)

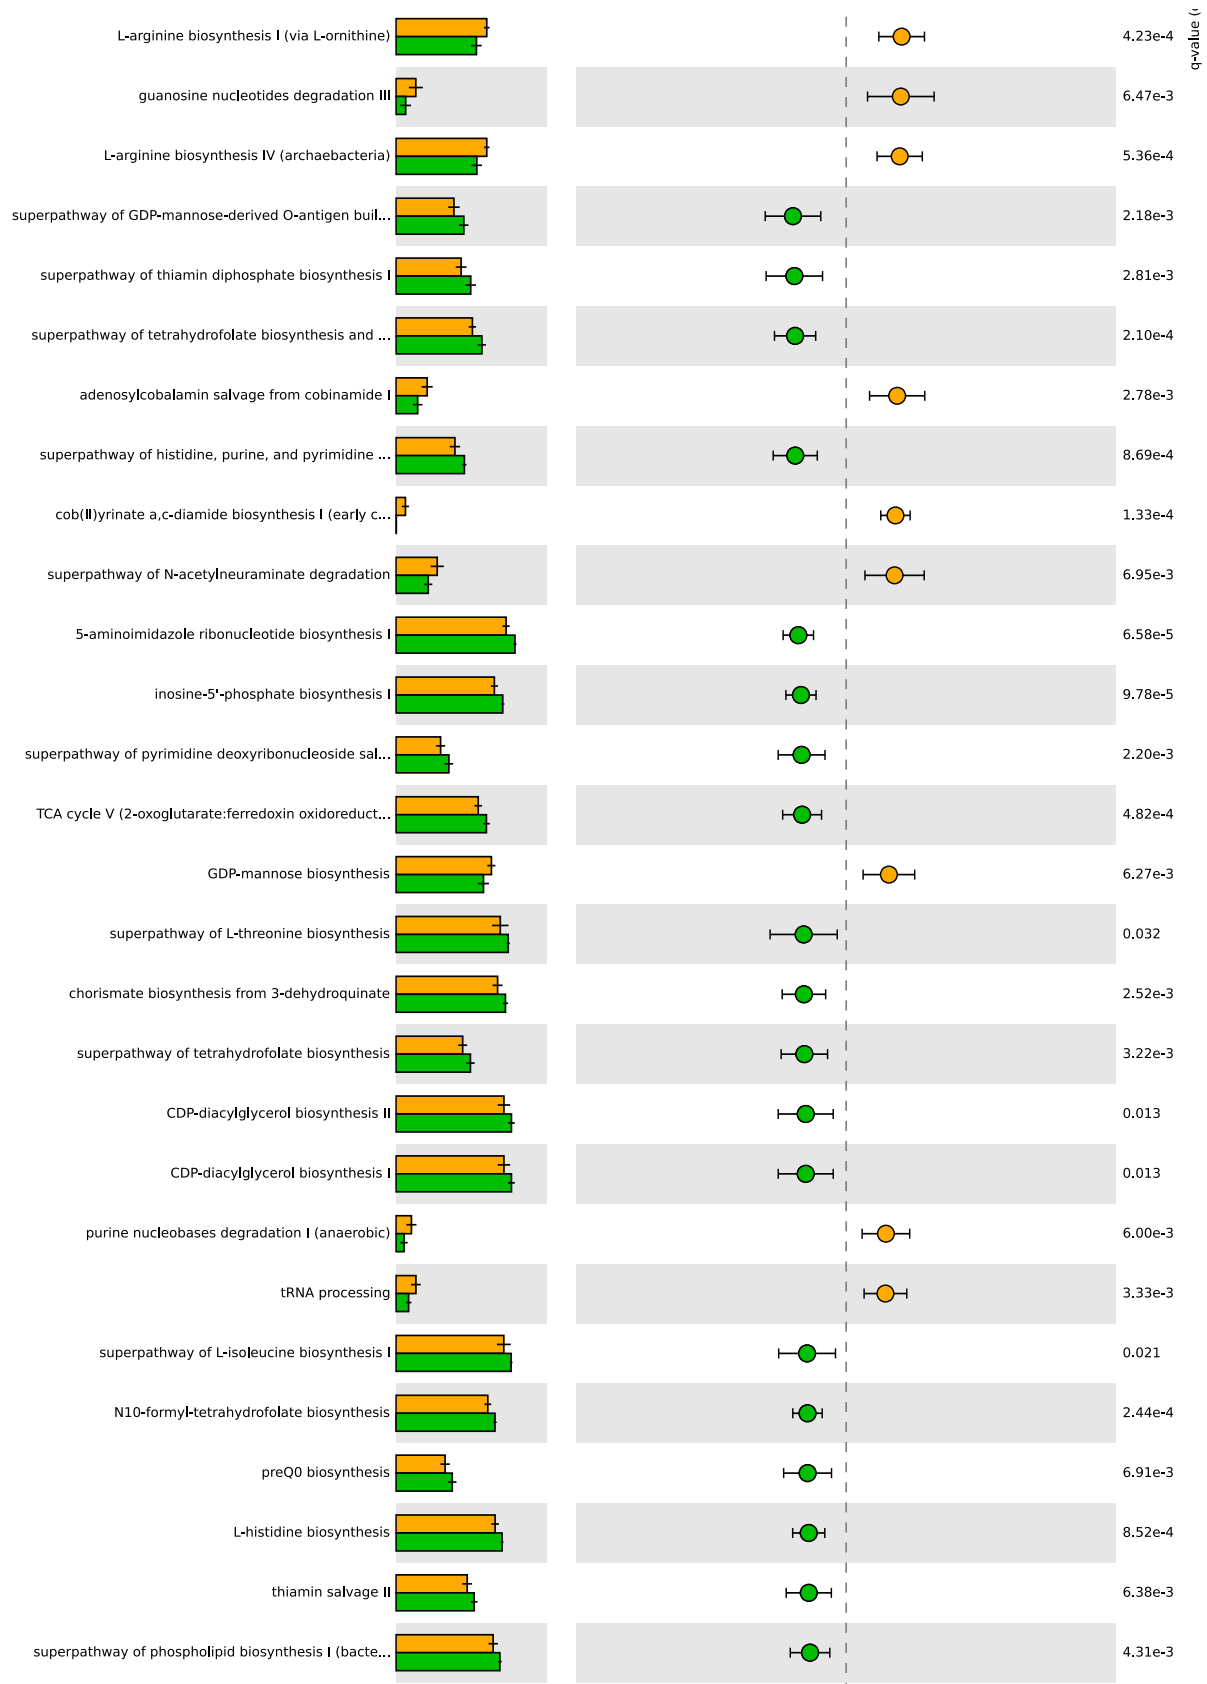

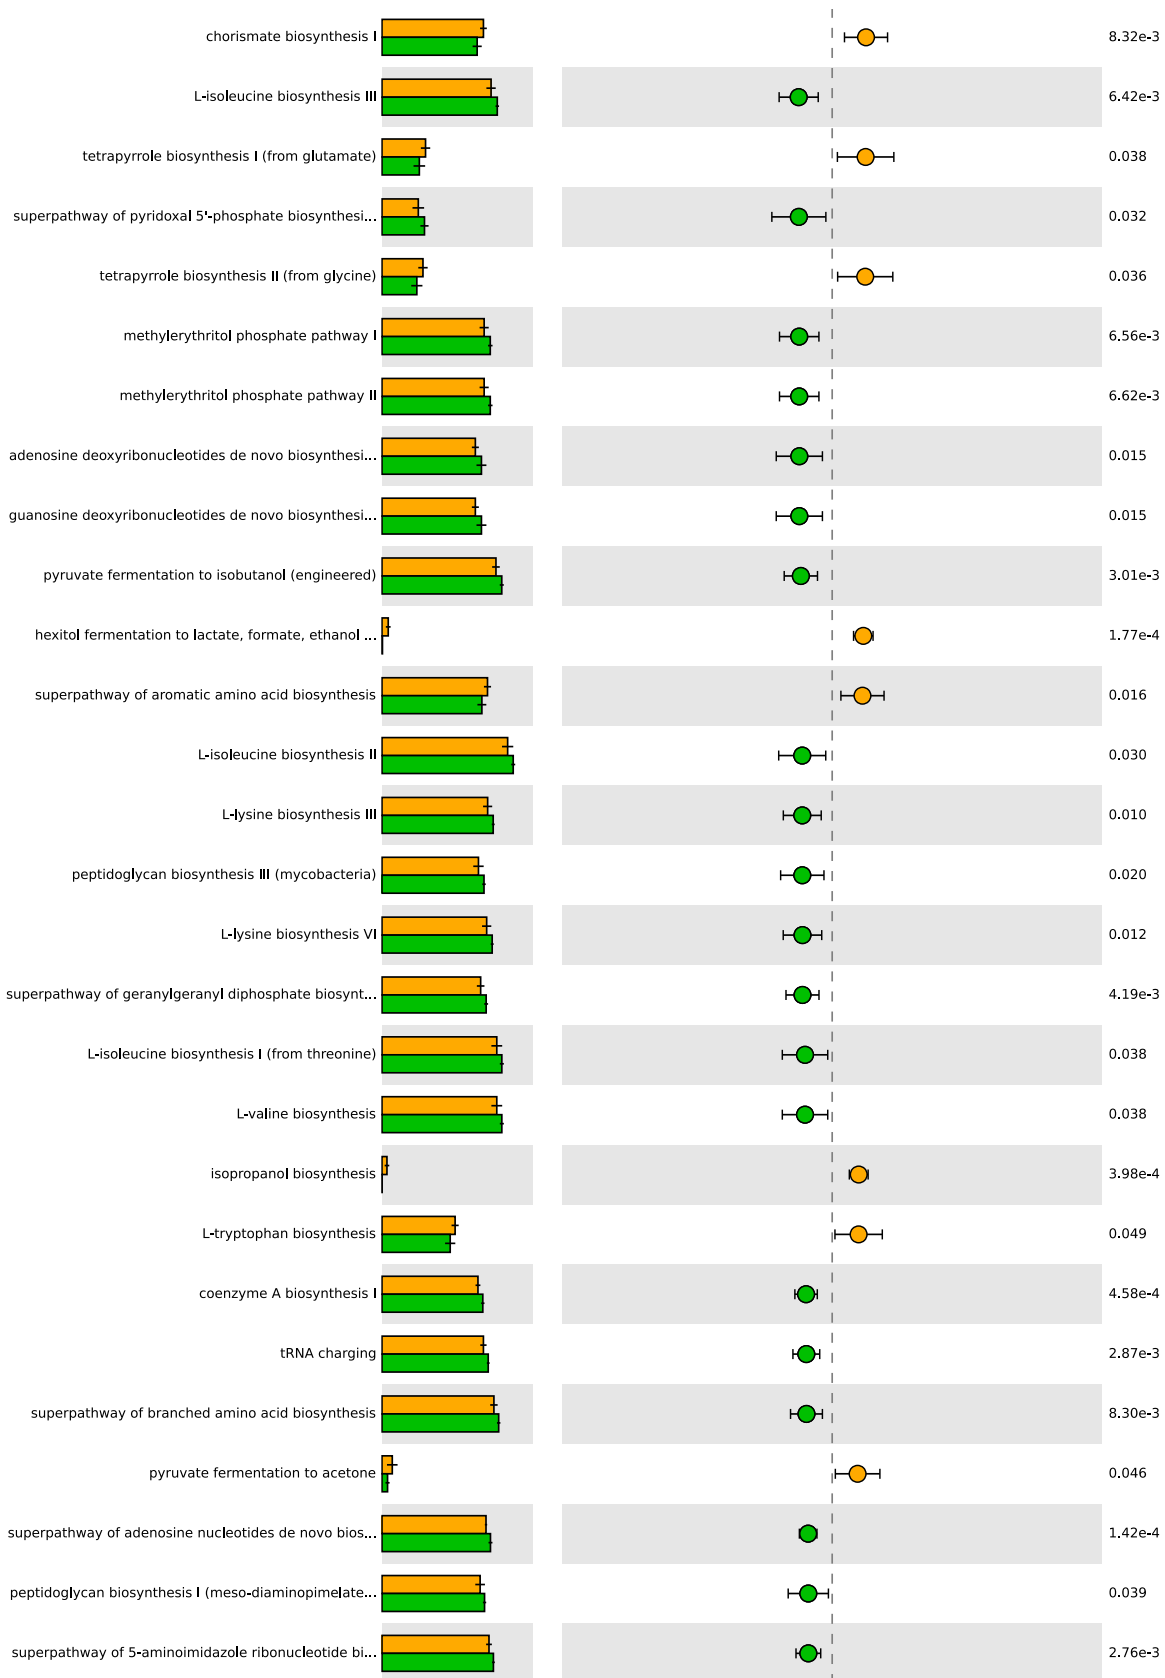



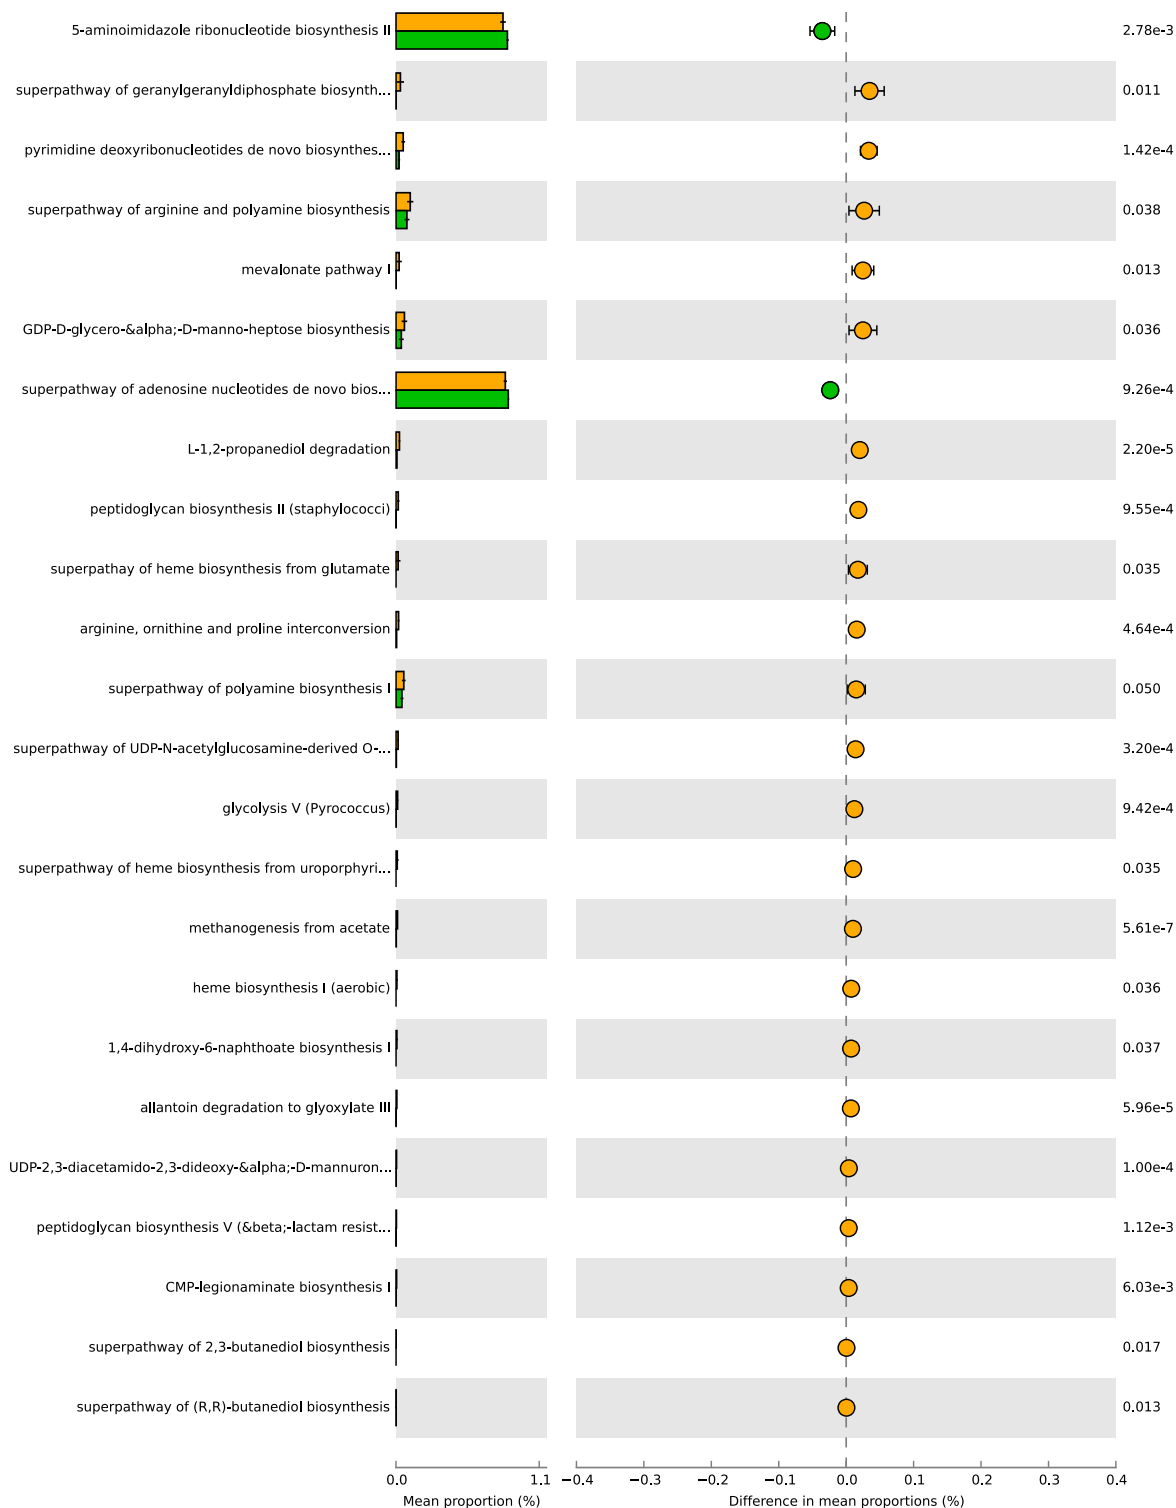

**Figure S9.** PICRUSt2 results indicating differential predicted functional pathways between the bean-free and the bean-containing diet groups in the male cohort: **(a)** 95 pathways in 0% vs 17.5% bean; **(b)** 131 pathways in 0% vs 35% bean; **(c)** 160 pathways in the 0% vs 70% bean. The bean-free diet (0%) is indicated in beige, while the bean-based diet samples (17.5%; 35%, and 70%)—in green. Extended error bar

plot indicating the mean proportion of pathways assigned to each group, difference between them, and corrected  $p$ -value ( $q$ -value) of each.
